# Supplementary material for: AMERICAN CAPITALISM IN EUROPE A EUROPEAN POINT OF VIEW
Source: MDPI journal article supplement (doi:10.3390/ijms232112883), 2016-01-01
Supplement: s1 [file s1]

## Situation description

The materials and methods in this article are similar to “Yongjiang Liu, Junna Liu, et al. Transcriptomics and metabolomics analyses of the mechanism of flavor synthesis in seeds of differently colored quinoa strains *Genomics*, (2022) ” [35] uses same batch of materials and different parts of the same set of transcriptome data. At present, this article is in nov-23-2021, genomics completed accept, It is hereby explained!
