# Supplementary material for: Transcriptome and Metabolome Combined to Analyze Quinoa Grain Quality Differences of Different Colors Cultivars
Source: Int J Mol Sci. 2022 Oct 25;23(21):12883. doi: 10.3390/ijms232112883 (PMC9656266; doi:10.3390/ijms232112883)
Supplement: Supplementary file 1 [file ijms-23-12883-s001.zip]

Archive with 25 entries (25 files):
- Situation description.pdf
- Table S1.xlsx
- Table S10.xlsx
- Table S11.xlsx
- Table S12.xlsx
- Table S13.xlsx
- Table S14.xlsx
- Table S15.xlsx
- Table S16.xlsx
- Table S17.xlsx
- Table S18.xlsx
- Table S19.xlsx
- Table S2.xlsx
- Table S20.xlsx
- Table S21.xlsx
- Table S22.xlsx
- Table S23.xlsx
- Table S24.xlsx
- Table S3.xlsx
- Table S4.xlsx
- Table S5.xlsx
- Table S6.xlsx
- Table S7.xlsx
- Table S8.xlsx
- Table S9.xlsx
