# Supplementary material for: Transcriptome and Metabolome Combined to Analyze Quinoa Grain Quality Differences of Different Colors Cultivars
Source: Int J Mol Sci. 2022 Oct 25;23(21):12883. doi: 10.3390/ijms232112883 (PMC9656266; doi:10.3390/ijms232112883)
Supplement: Supplementary file 1 [file ijms-23-12883-s001.zip › Table S1.xlsx]

## Sheet: Sheet1
Table S1 All sample date of metabolites
Index	Q1 (Da)	Q3 (Da)	Molecular Weight (Da)	Formula	Ionization model	Compounds	Class I	Class II	CAS	Level	B1	B2	B3	W1	W2	W3	R1	R2	R3	Y1	Y2	Y3	mix01	mix02	mix03	cpd_ID	kegg_map
pme3005	74.05	46.2	73.053	C3H7NO	[M+H]+	N,N-Dimethylformamide	Others	Others	1968/12/2	B	183000	177000	190000	54200	52400	82300	106000	142000	137000	64600	43200	28300	140000	99300	126000	C03134	--
pmb0782	86.1	69.2	85.089	C5H11N	[M+H]+	Piperidine	Alkaloids	Alkaloids	110-89-4	B	1530000	1650000	1410000	1520000	1700000	1540000	1160000	1410000	1390000	1330000	1000000	1250000	2030000	1590000	1450000	C01746	ko00960
pme2292	89.11	72.08	88.1	C4H12N2	[M+H]+	Putrescine	Alkaloids	Phenolamine	110-60-1	B	9	9	9	9	18900	27100	9	9	9	259000	146000	220000	101000	75300	112000	C00134	ko00330,ko00472,ko00480,ko00960,ko01100,ko01110,ko02010
ML10198895	88.04	88.04	89.048	C3H7NO2	[M-H]-	N-Methylglycine*	Amino acids and derivatives	Amino acids and derivatives	107-97-1	B	20300	19900	20700	16200	17100	20700	12600	16400	15700	7810	8540	8730	18400	15900	14500	C00213	ko00260,ko00330,ko01100
pme1987	88.05	71	89.048	C3H7NO2	[M-H]-	L-Alanine*	Amino acids and derivatives	Amino acids and derivatives	56-41-7	B	5550	4070	7030	7110	9870	11900	4540	2990	6020	3670	4760	2970	6450	9210	6020	C00041	ko00250,ko00270,ko00430,ko00450,ko00710,ko00970,ko00998,ko01100,ko01110,ko01200,ko01230,ko01502,ko02010,ko04122
pme2601	89	59	90.032	C3H6O3	[M-H]-	3-Hydroxypropanoic acid	Organic acids	Organic acids	503-66-2	B	42800	41400	44100	73000	58900	66900	35200	39500	47200	31500	26800	21100	48000	53000	41300	C01013	ko00240,ko00410,ko00640,ko01100,ko01200
Lmqp000873	101.02	55.02	100.018	C4H4O3	[M+H]+	Succinic anhydride	Organic acids	Organic acids	108-30-5	A	1610000	1440000	1790000	2660000	2190000	2320000	1630000	1550000	1780000	1670000	1590000	1920000	2130000	2020000	1820000	C19524	--
mws4052	102.05	56.05	101.048	C4H7NO2	[M+H]+	1-Aminocyclopropane-1-carboxylic acid	Organic acids	Organic acids	22059-21-8	B	309000	324000	294000	211000	246000	249000	192000	227000	204000	101000	138000	144000	305000	243000	207000	C01234	ko00270,ko01100,ko01110
pme1841	103.12	86.1	102.116	C5H14N2	[M+H]+	Cadaverine	Alkaloids	Phenolamine	462-94-2	B	15500	15200	15800	16800	12700	16400	10800	7890	12800	8210	9240	11000	12400	10100	15200	C01672	ko00310,ko00480,ko00960,ko01100,ko01110
pme3033	104.07	86	103.063	C4H9NO2	[M+H]+	N,N-Dimethylglycine*	Amino acids and derivatives	Amino acids and derivatives	1118-68-9	B	880000	949000	811000	1170000	1050000	1070000	720000	595000	805000	700000	925000	837000	1060000	958000	794000	C01026	ko00260,ko01100
pme3011	104.07	68.8	103.063	C4H9NO2	[M+H]+	γ-Aminobutyric acid*	Organic acids	Organic acids	1956/12/2	B	1170000	1260000	1090000	1580000	1320000	1450000	869000	596000	1020000	818000	1340000	1150000	1420000	1260000	1020000	C00334	ko00250,ko00330,ko00410,ko00650,ko00760,ko01100
pmb0484	104.1	60.1	103.091	C5H13NO	[M+H]+	Choline	Alkaloids	Alkaloids	62-49-7	A	327000	295000	360000	475000	450000	526000	329000	346000	366000	368000	378000	397000	425000	407000	357000	C00114	ko00260,ko00564,ko01100,ko02010
mws0206	103.04	57.03	104.047	C4H8O3	[M-H]-	2-Hydroxybutyric Acid	Organic acids	Organic acids	3347-90-8	B	11200	14500	7830	11400	13400	4920	16000	14500	13700	9	9	9	10600	5670	8100	C05984	ko00640
pme1975	103	59	104.06	C3H4O4	[M-H]-	Malonic acid	Organic acids	Organic acids	141-82-2	A	300000	327000	273000	361000	412000	500000	230000	211000	185000	110000	77200	103000	321000	266000	234000	C00383	ko00061,ko00240,ko00410,ko01100,ko01212
pme0010	106	60	105.043	C3H7NO3	[M+H]+	L-Serine	Amino acids and derivatives	Amino acids and derivatives	56-45-1	A	597000	539000	655000	345000	391000	308000	443000	441000	423000	335000	273000	331000	480000	453000	349000	C00065	ko00260,ko00261,ko00270,ko00460,ko00600,ko00630,ko00920,ko00970,ko01100,ko01110,ko01200,ko01230,ko01502,ko02010
pme2433	106.09	88	105.079	C4H11NO2	[M+H]+	Diethanolamine	Others	Others	111-42-2	B	26800	25700	28000	12300	10400	10800	20800	19900	8940	14900	19800	12500	30800	18200	15800	C06772	ko00564
mws0267	105.02	88	106.027	C3H6O4	[M-H]-	DL-Glyceric Acid	Organic acids	Organic acids	473-81-4	B	20300	14200	26300	27900	17200	9	28400	38100	16600	9	9	13200	24800	24900	13200	C00258	ko00030,ko00260,ko00561,ko00630,ko01100,ko01110,ko01200
mws0601	110.02	66	111.032	C5H5NO2	[M-H]-	Pyrrole-2-carboxylic acid	Organic acids	Organic acids	634-97-9	B	38800	41400	36300	31200	38600	28700	46800	31600	33800	43700	34700	48400	42700	37300	30200	C05942	ko00330
mws0177	111.01	67	112.016	C5H4O3	[M-H]-	2-Furanoic acid	Organic acids	Organic acids	88-14-2	B	125000	122000	128000	69300	63300	56800	122000	171000	94300	301000	199000	277000	161000	153000	147000	C01546	ko01100
pme0257	111.02	80	112.027	C4H4N2O2	[M-H]-	Uracil	Nucleotides and derivatives	Nucleotides and derivatives	66-22-8	A	125000	167000	83200	64400	183000	92700	70600	94300	84300	73800	81500	173000	97200	111000	106000	C00106	ko00240,ko00410,ko00770,ko01100
pme0006	116.07	70.1	115.063	C5H9NO2	[M+H]+	L-Proline	Amino acids and derivatives	Amino acids and derivatives	147-85-3	A	989000	1200000	780000	824000	1810000	2250000	383000	929000	771000	237000	366000	326000	1510000	1220000	1100000	C00148	ko00330,ko00332,ko00970,ko01100,ko01110,ko01230,ko02010
mws0376	115	71	116.011	C4H4O4	[M-H]-	Fumaric acid	Organic acids	Organic acids	110-17-8	B	265000	316000	214000	153000	158000	174000	186000	137000	145000	71100	84200	96500	222000	191000	164000	C00122	ko00020,ko00190,ko00220,ko00250,ko00350,ko00360,ko00620,ko00650,ko00760,ko01100,ko01110,ko01200
mws0823	115.04	71	116.047	C5H8O3	[M-H]-	3-Methyl-2-Oxobutanoic acid	Organic acids	Organic acids	759-05-7	B	57100	64000	50100	78200	82500	70800	50100	47300	54200	32800	32300	38600	55400	45600	43000	C00141	ko00280,ko00290,ko00770,ko00966,ko01100,ko01110,ko01210,ko01230
pme3193	116.04	74	117.043	C4H7NO3	[M-H]-	N-Acetyl-L-glycine	Amino acids and derivatives	Amino acids and derivatives	543-24-8	B	30300	26300	34300	44100	27900	39700	18300	19900	16900	14400	14600	15100	34400	21000	24100	--	--
pmb1096	118.07	91	117.058	C8H7N	[M+H]+	Indole	Alkaloids	Plumerane	120-72-9	A	5890	6410	5360	3180	4330	7510	7470	5080	5880	5180	1320	4700	3170	4330	3650	C00463	ko00380,ko00400,ko00402,ko01100,ko01110
mws0256	118.09	72.1	117.079	C5H11NO2	[M+H]+	L-Valine	Amino acids and derivatives	Amino acids and derivatives	72-18-4	A	1760000	1870000	1650000	2230000	2390000	2300000	1380000	1590000	1690000	1310000	1370000	1580000	2360000	1980000	1650000	C00183	ko00280,ko00290,ko00311,ko00460,ko00770,ko00966,ko00970,ko01100,ko01110,ko01210,ko01230,ko02010
mws0191	118.09	59	117.079	C5H11NO2	[M+H]+	Betaine	Alkaloids	Alkaloids	107-43-7	A	842000	833000	850000	768000	761000	728000	746000	790000	750000	821000	752000	684000	838000	800000	714000	C00719	ko00260,ko01100,ko02010
mws0192	117.02	73	118.027	C4H6O4	[M-H]-	Succinic acid	Organic acids	Organic acids	110-15-6	A	8880000	8540000	9230000	14100000	12700000	13000000	7360000	8000000	9800000	9510000	9800000	10500000	10900000	10800000	10700000	C00042	ko00020,ko00190,ko00250,ko00310,ko00350,ko00360,ko00620,ko00630,ko00640,ko00650,ko00760,ko00920,ko01100,ko01110,ko01200
mws0147	117.06	59	118.063	C5H10O3	[M-H]-	β-Hydroxyisovaleric acid	Organic acids	Organic acids	625-08-1	B	806000	979000	634000	416000	422000	662000	1070000	1040000	876000	421000	429000	414000	770000	691000	690000	C20827	ko00280,ko01100
pme3096	118	74	119.022	C3H5NO4	[M-H]-	Aminomalonic acid	Organic acids	Organic acids	1068-84-4	A	8040000	7650000	8430000	12700000	11300000	11500000	6810000	7420000	8730000	8500000	8930000	9140000	9920000	9490000	9230000	C00872	--
mws0671	120.07	74.1	119.058	C4H9NO3	[M+H]+	L-Homoserine*	Organic acids	Organic acids	672-15-1	A	472000	435000	510000	137000	194000	139000	340000	382000	277000	326000	227000	228000	394000	339000	237000	C00263	ko00260,ko00270,ko00300,ko00920,ko01100,ko01110,ko01230
mws0230	120.07	74	119.058	C4H9NO3	[M+H]+	L-Threonine*	Amino acids and derivatives	Amino acids and derivatives	72-19-5	A	470000	434000	505000	153000	169000	132000	295000	349000	280000	324000	126000	209000	370000	332000	222000	C00188	ko00260,ko00261,ko00290,ko00860,ko00970,ko01100,ko01110,ko01230,ko02010
pmp001287	120.08	103.05	119.073	C8H9N	[M+H]+	N-Benzylmethylene isomethylamine	Alkaloids	Alkaloids	-	A	1370000	1470000	1270000	2030000	2580000	2350000	1290000	1470000	1450000	1650000	1470000	1520000	2170000	1820000	1410000	--	--
pma0134	121.04	93.06	120.042	C4H8O4	[M+H]+	D-(-)-Threose	Others	Saccharides and Alcohols	95-43-2	B	36300	72500	9	19000	106000	8360	9	17400	9	9	9	22800	32800	28700	20900	C06463	--
pme0195	120.02	62	121.02	C3H7NO2S	[M-H]-	L-Cysteine	Amino acids and derivatives	Amino acids and derivatives	52-90-4	A	2710	3310	2110	3810	1910	2730	2890	4680	5510	4830	2760	7150	3050	4350	6010	C00097	ko00260,ko00270,ko00311,ko00332,ko00430,ko00460,ko00480,ko00730,ko00770,ko00920,ko00970,ko01100,ko01110,ko01200,ko01230,ko04122
pmb0069	122	105	121.053	C7H7NO	[M+H]+	Benzamide	Phenolic acids	Phenolic acids	55-21-0	B	294000	279000	308000	319000	692000	274000	211000	249000	256000	126000	79500	118000	337000	297000	255000	C09815	--
mws0491	122.1	105	121.089	C8H11N	[M+H]+	Phenethylamine	Others	Others	64-04-0	B	1120000	1060000	1170000	1260000	2530000	1020000	803000	925000	943000	471000	316000	441000	1260000	1080000	942000	C05332	ko00360,ko01100
mws0628	121.03	92	122.037	C7H6O2	[M-H]-	4-Hydroxybenzaldehyde	Phenolic acids	Phenolic acids	123-08-0	B	309000	338000	281000	173000	160000	155000	122000	154000	136000	141000	112000	123000	181000	167000	138000	C00633	ko01100
mws0133	123.06	79.9	122.048	C6H6N2O	[M+H]+	Nicotinamide	Others	Vitamin	98-92-0	B	1280000	1240000	1320000	563000	590000	643000	735000	996000	1150000	488000	618000	574000	1060000	871000	792000	C00153	ko00760,ko01100
pme2134	121	59	122.058	C4H10O4	[M-H]-	D-Threitol	Others	Saccharides and Alcohols	2418-52-2	B	70000	61900	78100	190000	268000	279000	136000	158000	76500	676000	716000	622000	266000	222000	221000	C16884	--
ML10179289	105.07	77.04	122.073	C8H10O	[M+H-H2O]+	2-Phenylethanol	Phenolic acids	Phenolic acids	1960/12/8	B	112000	98400	126000	139000	288000	111000	90400	112000	134000	55100	32600	83400	140000	135000	131000	C05853	ko00360
Lmbp000668	124.04	78.03	123.032	C6H5NO2	[M+H]+	Isonicotinic acid*	Organic acids	Organic acids	55-22-1	A	944000	1010000	874000	939000	1080000	847000	1110000	902000	941000	1200000	1370000	1210000	1410000	1150000	955000	C07446	--
pme1216	122.03	78	123.032	C6H5NO2	[M-H]-	2-Picolinic acid	Organic acids	Organic acids	98-98-6	B	1060000	1160000	964000	1180000	1190000	1000000	1490000	1040000	1140000	1580000	1890000	1720000	1550000	1320000	1250000	C10164	ko00380,ko01100
pme0490	124.04	78	123.032	C6H5NO2	[M+H]+	Nicotinic acid*	Others	Vitamin	59-67-6	A	909000	923000	896000	946000	1050000	789000	1180000	950000	946000	1120000	1460000	1200000	1380000	1200000	918000	C00253	ko00760,ko00960,ko01100,ko01110
Zmgn000216	125	78.96	126.008	C2H7O4P	[M-H]-	2-Hydroxyethylphosphonic acid	Organic acids	Organic acids	22987-21-9	B	85600	94500	76800	90300	85400	86100	89600	92400	57400	145000	179000	173000	99900	105000	89700	C06451	ko00440,ko00998,ko01100,ko01110
pmp001086	127.04	97	126.032	C6H6O3	[M+H]+	5-Hydroxymethylfurfural	Phenolic acids	Phenolic acids	67-47-0	B	191000	170000	212000	126000	127000	104000	147000	138000	158000	140000	115000	145000	188000	130000	139000	C11101	--
mws0251	127.05	110	126.043	C5H6N2O2	[M+H]+	Thymine	Nucleotides and derivatives	Nucleotides and derivatives	65-71-4	B	6500	6050	6960	9580	12600	21700	8920	6400	4270	3190	2810	3580	10800	7840	5020	C00178	ko00240,ko01100
mws0263	128.04	82.03	129.043	C5H7NO3	[M-H]-	5-Oxo-L-Proline	Amino acids and derivatives	Amino acids and derivatives	98-79-3	B	18800	23300	14300	13700	47800	25000	15300	19100	10900	6730	10400	25500	22400	18800	17200	C01879	ko00480,ko01100
ML10181668	130.09	84.08	129.079	C6H11NO2	[M+H]+	Cycloleucine	Amino acids and derivatives	Amino acids and derivatives	52-52-8	A	2890000	3660000	2130000	8380000	11100000	12200000	1600000	3400000	2420000	2000000	3140000	5430000	5740000	5030000	4640000	C03969	--
Rfmb319	130.09	84.08	129.079	C6H11NO2	[M+H]+	Pipecolic acid	Amino acids and derivatives	Amino acids and derivatives	4043-87-2	B	933000	1090000	778000	2320000	2990000	3690000	552000	1080000	801000	658000	941000	1800000	2020000	1610000	1490000	C00408	ko00310,ko00960,ko01100,ko01110
Zmgn000217	129.02	85.03	130.027	C5H6O4	[M-H]-	Methylenesuccinic acid	Organic acids	Organic acids	97-65-4	B	15900	16000	15900	34200	22800	33200	20900	21400	13100	10200	8880	17400	28800	19200	16600	C00490	ko00660,ko01100
ML10197929	130.09	88.04	131.069	C4H9N3O2	[M-H]-	Creatine	Others	Others	57-00-1	B	362000	311000	412000	515000	373000	591000	357000	290000	397000	474000	436000	535000	445000	376000	439000	C00300	ko00260,ko00330,ko01100
Zmpn000638	130.05	88.04	131.069	C4H9N3O2	[M-H]-	3-Guanidinopropionic acid	Organic acids	Organic acids	353-09-3	B	163000	149000	177000	246000	133000	212000	157000	145000	161000	122000	134000	135000	182000	170000	151000	C03065	--
mws0258	132.1	86	131.095	C6H13NO2	[M+H]+	L-Isoleucine*	Amino acids and derivatives	Amino acids and derivatives	73-32-5	A	347000	380000	314000	345000	362000	365000	245000	273000	296000	300000	208000	277000	415000	345000	315000	C00407	ko00280,ko00290,ko00460,ko00960,ko00966,ko00970,ko01100,ko01110,ko01210,ko01230,ko02010
mws0227	132.1	86.2	131.095	C6H13NO2	[M+H]+	L-Leucine*	Amino acids and derivatives	Amino acids and derivatives	61-90-5	A	363000	388000	339000	312000	374000	373000	251000	282000	294000	266000	234000	255000	439000	335000	318000	C00123	ko00280,ko00290,ko00966,ko00970,ko01100,ko01110,ko01210,ko01230,ko02010
pme0274	132.1	69	131.095	C6H13NO2	[M+H]+	6-Aminocaproic acid*	Organic acids	Organic acids	60-32-2	A	1860000	1840000	1880000	2230000	2280000	2660000	1550000	1480000	1860000	1730000	1130000	1780000	2520000	1980000	2000000	C02378	ko01100
pmp001198	132.1	57.1	131.095	C6H13NO2	[M+H]+	6-Deoxyfagomine*	Alkaloids	Alkaloids	197449-09-5	A	1720000	1910000	1530000	1680000	1720000	1820000	1240000	1420000	1420000	1380000	1060000	1380000	2130000	1730000	1440000	--	--
Lmmn000806	131.03	87.05	132.042	C5H8O4	[M-H]-	Dimethylmalonic acid	Organic acids	Organic acids	595-46-0	A	254000	270000	239000	228000	225000	257000	254000	272000	237000	103000	141000	103000	221000	228000	211000	--	--
Lmgn000160	131.05	70.03	132.053	C4H8N2O3	[M-H]-	3-Ureidopropionic Acid	Organic acids	Organic acids	462-88-4	B	28400	32200	24700	37400	36600	32200	27300	30000	33500	27500	23600	33600	39200	30800	28500	C02642	ko00240,ko00410,ko00770,ko01100
mws0001	133.06	74	132.054	C4H8N2O3	[M+H]+	L-Asparagine	Amino acids and derivatives	Amino acids and derivatives	70-47-3	A	107000	96300	117000	48700	49900	44700	68200	77200	72400	59100	47300	56000	99000	99800	63900	C00152	ko00250,ko00460,ko00970,ko01100,ko01110,ko01230
Lmrn002746	131.07	85.07	132.079	C6H12O3	[M-H]-	2-Hydroxy-4-methylpentanoic acid	Organic acids	Organic acids	498-36-2	A	126000	114000	138000	37400	33900	44300	145000	165000	157000	64200	68200	60000	118000	113000	99000	--	--
mws0972	131.07	85	132.079	C6H12O3	[M-H]-	6-Hydroxyhexanoic acid	Organic acids	Organic acids	1191-25-9	B	198000	214000	183000	445000	548000	290000	145000	146000	161000	92500	149000	124000	257000	235000	220000	C06103	--
mws0341	131.07	85	132.079	C6H12O3	[M-H]-	2-Hydroxyisocaproic acid	Organic acids	Organic acids	20312-37-2	A	196000	199000	193000	101000	166000	113000	157000	151000	173000	163000	128000	172000	164000	174000	155000	C03264	--
pme2527	133	116	132.09	C5H12N2O2	[M+H]+	L-Ornithine	Amino acids and derivatives	Amino acids and derivatives	70-26-8	B	32900	43200	22700	62000	86700	43800	14800	23600	34600	25400	27600	52900	49600	43300	44800	C00077	ko00220,ko00330,ko00472,ko00480,ko01100,ko01110,ko01210,ko01230,ko02010
mws0219	132.03	88	133.038	C4H7NO4	[M-H]-	L-Aspartic Acid	Amino acids and derivatives	Amino acids and derivatives	56-84-8	A	14300000	14800000	13700000	10400000	12700000	14000000	17600000	16100000	15000000	10400000	8280000	11800000	13800000	13400000	13100000	C00049	ko00220,ko00250,ko00260,ko00261,ko00270,ko00300,ko00340,ko00410,ko00460,ko00710,ko00760,ko00770,ko00970,ko01100,ko01110,ko01200,ko01210,ko01230,ko02010
mws0275	133.01	71.01	134.022	C4H6O5	[M-H]-	L-(-)-Malic acid*	Organic acids	Organic acids	636-61-3	A	678000	805000	552000	850000	1450000	1350000	523000	672000	511000	375000	482000	555000	1010000	792000	732000	C00149	ko00020,ko00620,ko00630,ko00710,ko01100,ko01110,ko01200
Lmbn000198	133.01	71.01	134.022	C4H6O5	[M-H]-	3-Dehydro-L-Threonic Acid*	Organic acids	Organic acids	-	A	22000000	25700000	18400000	26100000	34700000	36300000	15400000	18800000	17000000	11500000	15700000	13900000	26100000	23000000	22600000	C03064	ko00053,ko01100
Zmgn000503	133.05	71.01	134.058	C5H10O4	[M-H]-	2,3-Dihydroxy-3-Methylbutanoic Acid	Organic acids	Organic acids	1756-18-9	A	4400000	5820000	2980000	5140000	10100000	9280000	2980000	4280000	3520000	2600000	2220000	3760000	6600000	4000000	5030000	C04039	--
pme0040	136.06	119	135.054	C5H5N5	[M+H]+	Adenine	Nucleotides and derivatives	Nucleotides and derivatives	73-24-5	A	200000	237000	164000	304000	354000	315000	153000	200000	173000	149000	282000	197000	284000	195000	225000	C00147	ko00230,ko00908,ko01100
HJKP000649	136.07	91.05	135.068	C8H9NO	[M+H]+	N-benzylformamide	Alkaloids	Alkaloids	6343-54-0	B	563000	585000	541000	517000	543000	486000	568000	589000	557000	723000	477000	554000	697000	593000	473000	C15561	--
mws0889	135.03	75.01	136.037	C4H8O5	[M-H]-	D-Threonic Acid	Others	Saccharides and Alcohols	3909/12/4	A	396000	434000	358000	756000	754000	898000	209000	325000	344000	137000	277000	243000	506000	508000	488000	C21649	--
mws1336	138.06	120	137.048	C7H7NO2	[M+H]+	4-Aminobenzoic acid	Phenolic acids	Phenolic acids	150-13-0	A	80900	80200	81500	97400	119000	99700	46600	54400	66100	55100	83600	72600	95400	73900	69400	C00568	ko00790,ko01100
mws0146	138.05	78	137.048	C7H7NO2	[M+H]+	Nicotinic Acid Methyl Ester(Methyl Nicotinate)	Alkaloids	Alkaloids	93-60-7	B	112000	102000	123000	386000	386000	412000	84900	138000	156000	96000	115000	114000	229000	189000	178000	--	--
mws1078	138.05	92.1	137.048	C7H7NO2	[M+H]+	Anthranilic Acid	Phenolic acids	Phenolic acids	118-92-3	B	85700	66400	105000	252000	188000	130000	43400	48100	59700	22700	47400	39200	124000	85000	76100	C00108	ko00380,ko00400,ko00998,ko01058,ko01100,ko01110,ko01230
pme2268	138.05	94.07	137.048	C7H7NO2	[M+H]+	Trigonelline	Alkaloids	Alkaloids	535-83-1	A	7320000	6970000	7660000	7130000	7780000	7040000	7520000	7380000	6400000	7010000	6840000	6050000	8630000	7180000	6310000	C01004	ko00760
pma0948	138.09	121.1	137.084	C8H11NO	[M+H]+	Phenylethanolamine*	Others	Others	7568-93-6	B	237000	208000	265000	223000	187000	204000	78600	156000	89900	124000	143000	119000	215000	159000	153000	C02735	--
pme1002	138.09	103	137.084	C8H11NO	[M+H]+	L-Tyramine*	Amino acids and derivatives	Amino acids and derivatives	51-67-2	B	408000	355000	461000	176000	156000	162000	51200	265000	62300	140000	117000	103000	238000	194000	154000	C00483	ko00350,ko00950,ko01100,ko01110
Lmgn001670	137.03	108.02	138.032	C7H6O3	[M-H]-	Salicylic acid-2-O-glucoside	Phenolic acids	Phenolic acids	69-72-7	A	2170000	1830000	2500000	22200	24500	21400	490000	336000	325000	19100	19600	19000	615000	545000	486000	C00805	ko00360,ko01100,ko01110,ko04075
Lmbn002862	137.02	93.03	138.032	C7H6O3	[M-H]-	3-Hydroxybenzoic Acid	Organic acids	Organic acids	1999/6/9	B	1070000	1250000	882000	2150000	4420000	2800000	795000	966000	1440000	513000	1120000	964000	1760000	1610000	1520000	C00587	ko00400
Hmgn001653	137.02	93.04	138.032	C7H6O3	[M-H]-	Protocatechuic aldehyde	Phenolic acids	Phenolic acids	139-85-5	B	9600000	9690000	9510000	17600000	18000000	14700000	13300000	12400000	10500000	19300000	23100000	18900000	15500000	13900000	13800000	C16700	ko00950
mws2368	137.06	119.05	138.068	C8H10O2	[M-H]-	Tyrosol	Phenolic acids	Phenolic acids	501-94-0	B	273000	212000	333000	9	9	9	55200	35500	43300	9	9	9	75200	59800	64100	C06044	ko00350,ko01100
pme2828	140	99	139.027	C6H5NO3	[M+H]+	4-Nitrophenol	Phenolic acids	Phenolic acids	100-02-7	B	5740000	5650000	5830000	3230000	8760000	6490000	4030000	7010000	7990000	9850000	2700000	8030000	4060000	7200000	10100000	C00870	--
mws0704	140.01	78.96	141.019	C2H8NO4P	[M-H]-	O-Phosphorylethanolamine	Alkaloids	Alkaloids	1071-23-4	B	111000	93500	129000	73200	78800	73000	91700	90500	112000	64300	50300	39500	89100	74000	68600	C00346	ko00564,ko00600,ko01100
pma2987	142.1	124.09	141.09	C6H11N3O	[M+H]+	Histidinol	Others	Others	501-28-0	B	2620000	2930000	2320000	3300000	4020000	4590000	2230000	2650000	2410000	2400000	3190000	3110000	3450000	3320000	2900000	C00860	ko00340,ko01100,ko01110,ko01230
pme3207	141.02	59	142.027	C6H6O4	[M-H]-	Muconic acid	Organic acids	Organic acids	1119-72-8	B	3080000	3840000	2330000	2540000	3590000	1800000	2500000	2260000	2710000	3020000	2920000	3300000	2870000	2360000	2740000	C02480	ko01100
pmb0764	144.05	113.2	143.04	C6H9NOS	[M+H]+	4-Methyl-5-thiazoleethanol	Others	Others	137-00-8	B	24300	23800	24900	7610	13700	18400	17600	18500	13200	5480	6050	8200	20500	15900	13800	C04294	ko00730,ko01100
MA10074217	144.05	115.04	145.053	C9H7NO	[M-H]-	4-Hydroxyquinoline	Alkaloids	Quinoline alkaloids	611-36-9	B	12100	13200	11000	10800	10900	10200	14100	13200	10700	4660	7930	5630	7580	6930	6450	C06343	--
mws0103	146.06	91	145.053	C9H7NO	[M+H]+	Indole-3-carboxaldehyde	Alkaloids	Plumerane	487-89-8	B	279000	266000	292000	39200	37700	31000	46200	42700	42500	20700	22500	25900	90300	79400	64800	C08493	--
mws0567	146.09	87	145.085	C5H11N3O2	[M+H]+	4-Guanidinobutyric acid	Organic acids	Organic acids	463-00-3	B	156000	136000	177000	101000	121000	124000	90300	127000	123000	85700	100000	94100	157000	122000	106000	C01035	ko00330,ko01100
pme2380	145.01	101	146.022	C5H6O5	[M-H]-	α-Ketoglutaric acid	Organic acids	Organic acids	328-50-7	B	640000	640000	640000	543000	639000	686000	504000	526000	503000	414000	257000	380000	610000	435000	446000	C00026	ko00020,ko00040,ko00053,ko00220,ko00250,ko00300,ko00310,ko00340,ko00430,ko00630,ko00650,ko00660,ko01100,ko01110,ko01200,ko01210,ko01230
Lmgn000224	145.01	57.03	146.022	C5H6O5	[M-H]-	(S)-2-methyl-3-oxosuccinic acid	Organic acids	Organic acids	-	B	49100	50200	48000	39400	46700	50700	47800	51300	40300	40300	43700	48200	49100	50800	41100	C06030	ko00660
Lmbn001609	145.05	83.05	146.058	C6H10O4	[M-H]-	(S)-2-Acetyl-2-Hydroxybutanoic Acid	Organic acids	Organic acids	-	B	31800	26600	37000	54100	56800	32800	35200	32500	23500	24000	25600	31000	44100	35500	29400	C06006	ko00290,ko01100,ko01110,ko01210,ko01230
mws0924	145.05	101	146.058	C6H10O4	[M-H]-	2-Methylglutaric acid	Organic acids	Organic acids	617-62-9	A	1650000	1770000	1520000	2300000	2410000	1880000	1680000	1650000	1490000	1350000	1730000	1630000	2040000	1830000	1640000	--	--
Wmzn000227	145.06	109.04	146.058	C6H10O4	[M-H]-	2,2-Dimethylsuccinic acid	Organic acids	Organic acids	597-43-3	A	155000	155000	156000	180000	192000	219000	137000	132000	149000	111000	103000	143000	160000	166000	141000	--	--
pme0193	147.08	84	146.069	C5H10N2O3	[M+H]+	L-Glutamine	Amino acids and derivatives	Amino acids and derivatives	56-85-9	A	1760000	1870000	1660000	3330000	4030000	3800000	1610000	1670000	1950000	1650000	2000000	2230000	2960000	2530000	2380000	C00064	ko00220,ko00230,ko00240,ko00250,ko00630,ko00910,ko00970,ko01100,ko01230,ko02010
pme0026	147.11	84	146.106	C6H14N2O2	[M+H]+	L-Lysine	Amino acids and derivatives	Amino acids and derivatives	56-87-1	A	1460000	1590000	1340000	2840000	3190000	3010000	1310000	1290000	1540000	1380000	1570000	1730000	2420000	2030000	1900000	C00047	ko00300,ko00310,ko00780,ko00960,ko00970,ko01100,ko01110,ko01210,ko01230,ko02010
pme1691	147.13	87.2	146.118	C7H16NO2	[M+H]+	Acetylcholine	Alkaloids	Alkaloids	60-31-1	B	104000	105000	103000	118000	155000	176000	82900	82200	87800	47700	34400	51600	122000	76400	109000	C01996	ko00564
Zmzn000113	146.05	102.06	147.053	C5H9NO4	[M-H]-	L-threo-3-Methylaspartate*	Amino acids and derivatives	Amino acids and derivatives	6061-13-8	A	4600000	4790000	4410000	5100000	6930000	6160000	3620000	3860000	4120000	2850000	2450000	3680000	4710000	4790000	4190000	C03618	ko00630,ko00660,ko01100,ko01200
pme0014	148.06	84	147.053	C5H9NO4	[M+H]+	L-Glutamic acid*	Amino acids and derivatives	Amino acids and derivatives	56-86-0	A	26700000	26800000	26500000	17100000	20900000	18400000	16300000	20700000	18600000	12000000	10700000	8960000	21900000	22400000	14700000	C00025	ko00220,ko00250,ko00330,ko00332,ko00340,ko00430,ko00480,ko00630,ko00650,ko00660,ko00860,ko00910,ko00970,ko01100,ko01110,ko01200,ko01210,ko01230,ko02010
mws1050	148.06	88	147.053	C5H9NO4	[M+H]+	O-Acetylserine*	Amino acids and derivatives	Amino acids and derivatives	5147-00-2	A	482000	471000	493000	790000	1150000	936000	374000	475000	441000	75800	134000	110000	692000	580000	495000	C00979	ko00270,ko00908,ko00920,ko01100,ko01110,ko01200,ko01230,ko04122
Zmyn000247	147.03	57.03	148.037	C5H8O5	[M-H]-	(S)-2-Hydroxyglutaric Acid	Organic acids	Organic acids	13095-48-2	A	88600	106000	71600	140000	154000	116000	124000	133000	87900	98800	92200	133000	110000	103000	99600	C03196	ko00310,ko01100
mws2213	147.05	77.01	148.052	C9H8O2	[M-H]-	Cinnamic acid	Phenolic acids	Phenolic acids	140-10-3	B	51900	53200	50700	13400	20200	19000	20600	17600	33400	3460	4550	4350	23800	20600	19600	C00423	ko00130,ko00360,ko00940,ko00998,ko01100,ko01110
mws1024	147.05	129	148.052	C9H8O2	[M-H]-	p-Coumaraldehyde	Phenolic acids	Phenolic acids	2538-87-6	A	674000	387000	961000	9	9	9	9	9	9	9	9	9	126000	101000	110000	C05608	ko00940,ko01100,ko01110
Lmgp000796	150.06	61.01	149.048	C8H7NO2	[M+H]+	4-Hydroxymandelonitrile	Alkaloids	Alkaloids	13093-65-7	A	1480000	1550000	1410000	2920000	3270000	2760000	1320000	1640000	1770000	1410000	1500000	1700000	2460000	2030000	1830000	C00650	--
pme1210	150.06	61	149.051	C5H11NO2S	[M+H]+	L-Methionine	Amino acids and derivatives	Amino acids and derivatives	63-68-3	A	1380000	1450000	1300000	2470000	3000000	2730000	1160000	1520000	1600000	1150000	1330000	1440000	2240000	1810000	1590000	C00073	ko00270,ko00966,ko00970,ko01100,ko01110,ko01210,ko01230
mws0847	150.08	133	149.07	C6H7N5	[M+H]+	1-Methyladenine	Nucleotides and derivatives	Nucleotides and derivatives	5142-22-3	B	26600	30200	23000	38900	42800	46100	34200	33400	42300	22900	19300	27000	38500	32800	19900	C02216	--
mws0262	149.01	87	150.016	C4H6O6	[M-H]-	L-Tartaric acid	Organic acids	Organic acids	87-69-4	B	291000	365000	217000	27100	40100	33500	84000	225000	126000	92500	55600	74000	162000	111000	123000	C00898	ko00630,ko01100
Zmgn000173	149.05	75.01	150.053	C5H10O5	[M-H]-	D-Ribose*	Others	Saccharides and Alcohols	50-69-1	A	57600	65200	49900	118000	125000	153000	39100	52200	73500	27700	55800	38600	87200	67500	69400	C00121	ko00030,ko01100,ko02010
mws1499	149.05	59.01	150.053	C5H10O5	[M-H]-	D-(-)-Arabinose*	Others	Saccharides and Alcohols	10323-20-3	A	301000	325000	277000	141000	162000	169000	307000	295000	212000	136000	161000	120000	230000	222000	228000	C00216	--
pme0183	152.06	135	151.049	C5H5N5O	[M+H]+	Isoguanine	Nucleotides and derivatives	Nucleotides and derivatives	3373-53-3	A	388000	367000	409000	277000	454000	400000	229000	213000	341000	161000	243000	249000	392000	345000	294000	--	--
pme1109	152.06	135	151.049	C5H5N5O	[M+H]+	Guanine	Nucleotides and derivatives	Nucleotides and derivatives	73-40-5	A	1640000	1570000	1720000	917000	2100000	1630000	990000	928000	1710000	536000	814000	641000	1730000	1430000	1320000	C00242	ko00230,ko01100
pme0256	151.03	151	152.033	C5H4N4O2	[M-H]-	Xanthine	Nucleotides and derivatives	Nucleotides and derivatives	69-89-6	A	201000	250000	153000	7690000	25100000	13800000	268000	122000	166000	211000	217000	241000	6360000	6550000	4440000	C00385	ko00230,ko00232,ko01100,ko01110
mws0458	151.04	136	152.047	C8H8O3	[M-H]-	Vanillin	Phenolic acids	Phenolic acids	121-33-5	B	365000	400000	330000	458000	319000	296000	261000	204000	235000	381000	318000	281000	363000	321000	339000	C00755	ko00998,ko01100,ko01110
mws0182	151.04	106.9	152.047	C8H8O3	[M-H]-	p-Hydroxyphenyl acetic acid	Phenolic acids	Phenolic acids	156-38-7	B	1480000	1510000	1460000	3820000	4480000	3390000	1780000	1570000	1470000	2000000	2740000	2490000	2580000	2250000	2450000	C00642	ko00350,ko00360,ko01100
pme0513	151.06	59	152.068	C5H12O5	[M-H]-	Xylitol*	Others	Saccharides and Alcohols	87-99-0	B	48200	36300	60000	40600	54800	60000	32200	49500	40600	41400	91600	60700	44900	47500	31100	C00379	ko00040,ko01100,ko02010
mws0213	151.06	71	152.068	C5H12O5	[M-H]-	Ribitol*	Others	Saccharides and Alcohols	488-81-3	B	27900	26500	29300	27700	29700	35300	34500	25900	25000	22000	42800	29800	43800	30000	38000	C00474	ko00040,ko00740,ko01100
ML10177402	152.03	108.05	153.043	C7H7NO3	[M-H]-	4-Aminosalicylic acid	Phenolic acids	Phenolic acids	65-49-6	B	21700	17600	25900	9	9	9	12100	8970	5740	9	9	9	7490	5500	6290	C02518	--
mws4002	154.09	137	153.079	C8H11NO2	[M+H]+	Dopamine	Alkaloids	Alkaloids	51-61-6	B	642000	700000	584000	52400	112000	110000	217000	244000	186000	163000	115000	115000	343000	254000	191000	C03758	ko00350,ko00950,ko00965,ko01100,ko01110
mws0183	153.02	109.03	154.027	C7H6O4	[M-H]-	3,4-Dihydroxybenzoic acid (Protocatechuic acid)*	Phenolic acids	Phenolic acids	99-50-3	A	3550000	2930000	4180000	174000	287000	175000	1500000	1140000	957000	162000	263000	156000	1100000	1040000	957000	C00230	ko01100,ko01110
mws0180	153.02	109.03	154.027	C7H6O4	[M-H]-	2,5-Dihydroxybenzoic acid*	Phenolic acids	Phenolic acids	490-79-9	A	1570000	1270000	1880000	94000	125000	84700	654000	507000	421000	79400	125000	80000	514000	486000	421000	C00628	ko00350,ko01100
pmb3099	153.03	125	154.039	C4H11O4P	[M-H]-	Diethyl phosphate	Organic acids	Organic acids	598-02-7	B	354000	411000	297000	346000	243000	299000	316000	311000	267000	284000	238000	235000	246000	248000	224000	C06608	--
mws0254	156.08	110	155.069	C6H9N3O2	[M+H]+	L-Histidine	Amino acids and derivatives	Amino acids and derivatives	71-00-1	A	3000000	3310000	2690000	4550000	2970000	4470000	2760000	2480000	3520000	2510000	1260000	2750000	3780000	3230000	3290000	C00135	ko00340,ko00410,ko00970,ko01100,ko01110,ko01230,ko02010
pmb0819	157	130	156.069	C10H8N2	[M+H]+	3-Indoleacetonitrile	Alkaloids	Plumerane	771-51-7	B	157000	164000	149000	155000	166000	153000	173000	178000	150000	168000	116000	145000	180000	174000	152000	C02938	ko00380,ko01100
Lmbn001467	158.08	116.07	159.09	C7H13NO3	[M-H]-	5-Acetamidopentanoic Acid	Organic acids	Organic acids	1072-10-2	B	281000	248000	314000	678000	286000	548000	343000	288000	290000	273000	171000	283000	352000	309000	332000	C03087	ko00310,ko01100
Lmbn002072	159.07	97.07	160.074	C7H12O4	[M-H]-	2-Propylsuccinic acid	Organic acids	Organic acids	618-57-5	B	30100	28500	31700	29600	21700	20800	23800	21100	22600	24600	21400	32700	25300	28600	16800	C16657	--
pme0128	159.08	88	160.085	C6H12N2O3	[M-H]-	L-Alanyl-L-Alanine	Amino acids and derivatives	Amino acids and derivatives	1948-31-8	B	25800	25500	26100	37800	37300	31500	30900	28500	29700	10100	14600	13300	26700	33400	28000	--	--
mws0005	161.11	144	160.1	C10H12N2	[M+H]+	Tryptamine	Alkaloids	Plumerane	61-54-1	B	744000	722000	766000	840000	1060000	1160000	742000	765000	790000	118000	153000	131000	876000	790000	764000	C00398	ko00380,ko00901,ko01100,ko01110
Lmgp001898	162.06	116.05	161.048	C9H7NO2	[M+H]+	4,6-Dihydroxyquinoline	Alkaloids	Quinoline alkaloids	3517-61-1	A	19800	20700	19000	44000	65200	69800	20400	15800	20300	17600	31500	26900	36000	36000	40500	C05639	ko00380,ko01100
mws1417	160.04	116	161.048	C9H7NO2	[M-H]-	Indole-3-carboxylic acid	Alkaloids	Plumerane	771-50-6	B	435000	437000	433000	287000	326000	286000	347000	346000	298000	853000	828000	683000	496000	468000	420000	C19837	--
mws1346	162.08	98	161.069	C6H11NO4	[M+H]+	DL-2-Aminoadipic acid	Alkaloids	Alkaloids	542-32-5	B	408000	409000	407000	268000	240000	280000	436000	526000	309000	194000	126000	227000	395000	334000	324000	C00956	ko00300,ko00310,ko00311,ko01100,ko01110,ko01210,ko01230
pme2914	161.05	99	162.053	C6H10O5	[M-H]-	3-Hydroxy-3-methylpentane-1,5-dioic acid	Amino acids and derivatives	Amino acids and derivatives	503-49-1	B	1460000	1550000	1360000	1130000	1140000	1350000	1110000	1410000	1320000	738000	601000	681000	1280000	1210000	1100000	C03761	--
pmf0440	163.08	91.1	162.068	C10H10O2	[M+H]+	4-MethoxycinnaMaldehyde	Phenolic acids	Phenolic acids	1963-36-6	B	64200	67700	60600	53200	48600	60000	49800	56000	57900	43000	28900	33000	55000	45200	43600	C10475	--
pme2758	162.04	144	163.048	C5H9NO5	[M-H]-	4-Hydroxy-L-glutamic acid	Amino acids and derivatives	Amino acids and derivatives	3913-68-6	B	47400	46700	48100	54300	71900	62600	60800	53100	57300	33900	30500	34700	56900	54600	53500	C03079	--
pme1419	164.07	104	163.067	C6H13NO2S	[M+H]+	L-Methionine methyl ester	Amino acids and derivatives	Amino acids and derivatives	10332-17-9	B	34000	46000	21900	55700	51800	47400	28000	35400	38700	33200	50800	45700	40200	36100	36600	--	--
Lmbp000123	164.07	56.05	163.067	C6H13NO2S	[M+H]+	L-Homomethionine	Amino acids and derivatives	Amino acids and derivatives	25148-30-5	B	37000	36600	37400	71200	90300	115000	23400	55500	50100	23000	40800	35100	88100	80300	39400	C17213	ko00966,ko01110,ko01210
Lmbn002739	163.04	119.05	164.047	C9H8O3	[M-H]-	3-Hydroxycinnamic Acid	Phenolic acids	Phenolic acids	14755-02-3	B	464000	424000	503000	606000	725000	590000	609000	615000	806000	111000	108000	79700	485000	422000	407000	C12621	ko00360,ko01100
pmb0142	165.1	95.2	164.047	C9H8O3	[M+H]+	Caffeic aldehyde	Phenolic acids	Phenolic acids	141632-15-7	B	9850	10400	9320	6480	6040	6950	14100	8000	7770	9	9	9	7470	5870	6880	C10945	ko00940,ko01110
pme1439	165.05	119	164.047	C9H8O3	[M+H]+	p-Coumaric acid	Phenolic acids	Phenolic acids	501-98-4	A	1270000	946000	1600000	530000	581000	364000	1510000	1220000	1200000	257000	172000	224000	824000	899000	598000	C00811	ko00130,ko00350,ko00940,ko00950,ko00998,ko01100,ko01110
pme2529	163.2	101	164.068	C6H12O5	[M-H]-	1,5-Anhydro-D-glucitol	Others	Saccharides and Alcohols	154-58-5	B	116000	129000	104000	57000	74300	77300	115000	111000	110000	67600	129000	90300	95100	79100	101000	C07326	--
pme3083	164.04	120	165.043	C8H7NO3	[M-H]-	2-(Formylamino)benzoic acid	Phenolic acids	Phenolic acids	3342-77-6	B	555000	664000	447000	262000	261000	280000	495000	387000	505000	134000	67700	112000	376000	366000	316000	C05653	ko00380,ko01100
pme2617	166.05	102	165.046	C5H11NO3S	[M+H]+	L-Methionine Sulfoxide	Amino acids and derivatives	Amino acids and derivatives	3226-65-1	B	2800000	2980000	2610000	4200000	4220000	4610000	2720000	2960000	2500000	2770000	3060000	3460000	4260000	3440000	3500000	C02989	ko00270
pme0021	166.09	120.08	165.07	C9H11NO2	[M+H]+	L-Phenylalanine	Amino acids and derivatives	Amino acids and derivatives	63-91-2	A	4200000	4520000	3890000	6630000	7990000	8010000	4300000	4540000	4420000	6180000	4550000	5370000	6240000	5740000	5200000	C00079	ko00360,ko00400,ko00460,ko00940,ko00960,ko00966,ko00970,ko00998,ko01100,ko01110,ko01210,ko01230,ko02010
pme0282	165.02	77.04	166.027	C8H6O4	[M-H]-	Phthalic acid	Organic acids	Organic acids	88-99-3	A	41400	52200	30600	34200	44900	39400	49900	50700	37600	28500	31400	42800	51200	46000	33100	C01606	ko01100,ko02010
pmc0274	167.1	121.1	166.031	C6H6N4S	[M+H]+	6-Methylmercaptopurine	Nucleotides and derivatives	Nucleotides and derivatives	50-66-8	B	2690000	2840000	2540000	4520000	5110000	4710000	2610000	3110000	2900000	3460000	2810000	3350000	4190000	3750000	3210000	C16614	--
mws0344	165.04	75	166.048	C5H10O6	[M-H]-	D-Xylonic acid	Organic acids	Organic acids	526-91-0	A	12400000	13300000	11500000	14100000	14200000	13400000	10600000	11100000	10600000	2140000	3960000	2600000	12300000	11400000	10100000	C00502	ko00040,ko01100
mws0467	165.06	119.05	166.063	C9H10O3	[M-H]-	3-(4-Hydroxyphenyl)-propionic acid	Phenolic acids	Phenolic acids	501-97-3	B	39600	41700	37500	32000	27800	42500	42500	34700	28800	15800	29600	22700	26400	29800	27900	C01744	--
mws1382	165.06	122.04	166.063	C9H10O3	[M-H]-	4'-Hydroxy-3'-methoxyacetophenone (Acetovanillone)	Phenolic acids	Phenolic acids	498-02-2	B	6780	8800	4770	18400	27800	17700	9	9	9	5640	12700	8850	10700	9250	8550	C11380	--
mws0851	143.11	143.11	166.097	C8H15NaO2	[M-Na]-	Sodium Valproate	Others	Others	1069-66-5	B	3280000	3400000	3160000	2800000	2830000	2420000	2470000	2770000	2900000	1670000	1970000	1710000	2570000	2420000	2290000	--	--
Zmjp000624	168.06	150.05	167.058	C8H9NO3	[M+H]+	Pyridoxal	Others	Vitamin	66-72-8	B	72700	65100	80300	80600	103000	108000	71900	62800	47600	168000	220000	152000	98600	89200	80900	C00250	ko00750,ko01100
NK10253223	168.06	94.06	167.058	C8H9NO3	[M+H]+	2-Amino-3-methoxybenzoic acid	Phenolic acids	Phenolic acids	3177-80-8	B	74500	66900	82200	82800	89500	91600	69000	57000	55200	166000	203000	159000	102000	91800	84300	C05831	ko00380
mws2125	166.98	78.7	167.982	C3H5O6P	[M-H]-	Phosphoenolpyruvate	Organic acids	Organic acids	138-08-9	B	438000	372000	505000	295000	373000	374000	296000	233000	395000	109000	74300	98000	357000	292000	259000	C00074	ko00010,ko00020,ko00400,ko00440,ko00620,ko00710,ko00998,ko01100,ko01110,ko01200,ko01230
mws0028	167.03	108.02	168.042	C8H8O4	[M-H]-	Vanillic acid	Phenolic acids	Phenolic acids	121-34-6	A	17400000	18500000	16400000	38200000	43100000	33800000	19000000	19600000	19700000	20700000	25600000	21800000	25700000	23700000	21900000	C06672	--
Hmbp001276	169.05	65.03	168.042	C8H8O4	[M+H]+	Gallacetophenone	Phenolic acids	Phenolic acids	528-21-2	A	8580000	8030000	9120000	12800000	15100000	10600000	7310000	8740000	7400000	5950000	6670000	7460000	10800000	9380000	8820000	--	--
pme1383	170.08	134.1	169.074	C8H11NO3	[M+H]+	Pyridoxine	Others	Vitamin	65-23-6	A	1590000	1690000	1490000	988000	1410000	1020000	1920000	2410000	2590000	199000	498000	380000	1700000	1380000	1240000	C00314	ko00750,ko01100
pme0181	170.09	124	169.085	C7H11N3O2	[M+H]+	3-Methyl-L-Histidine	Amino acids and derivatives	Amino acids and derivatives	368-16-1	B	26500	21800	31100	27800	26800	30800	36700	35300	23100	31100	32700	30000	35900	27100	21200	C01152	ko00340,ko01100
pme3186	169	79	169.998	C3H7O6P	[M-H]-	DL-Glyceraldehyde-3-phosphate	Organic acids	Organic acids	591-59-3	B	37200	31400	42900	45000	30200	40600	17100	26700	29600	22400	11500	14500	39900	29600	28400	C00661	--
Zmzn000078	168.99	78.96	169.998	C3H7O6P	[M-H]-	Dihydroxyacetone phosphate	Others	Saccharides and Alcohols	1957/4/5	B	22100	17300	26900	31300	26500	29400	15600	16800	14900	12900	26200	25000	21700	29600	24100	C00111	ko00010,ko00040,ko00051,ko00052,ko00561,ko00562,ko00564,ko00640,ko00710,ko00760,ko01100,ko01110,ko01200,ko01230
Lmbn003524	171.1	99.08	172.11	C9H16O3	[M-H]-	9-Oxononanoic acid	Organic acids	Organic acids	2553-17-5	B	11800	12000	11600	21000	15300	15600	8660	11700	10500	8170	5440	8100	16400	11200	15300	C16322	ko00592,ko01110
pme0253	174.11	86	173.105	C8H15NO3	[M+H]+	N-Acetyl-L-leucine	Amino acids and derivatives	Amino acids and derivatives	1188-21-2	B	14800	16900	12700	7530	17000	11100	7420	4520	10400	7890	7780	5540	17900	13200	13600	C02710	--
MA10039492	173.01	71.03	174.016	C6H6O6	[M-H]-	Dehydroascorbic acid	Others	Vitamin	490-83-5	A	216000	234000	198000	180000	167000	198000	172000	204000	236000	48900	55300	68800	151000	125000	145000	C05422	ko00053,ko00480,ko01100
pme3009	175.02	99	174.016	C6H6O6	[M+H]+	Trans-Citridic acid	Organic acids	Organic acids	4023-65-8	A	792000	788000	795000	713000	843000	889000	665000	819000	633000	952000	782000	787000	849000	1150000	618000	C02341	ko00660,ko01100
mws0242	173.08	111	174.089	C8H14O4	[M-H]-	Suberic Acid	Organic acids	Organic acids	505-48-6	A	120000	149000	90600	181000	281000	197000	107000	118000	120000	89400	115000	128000	167000	139000	101000	C08278	--
Lmgn002555	173.08	59.01	174.089	C8H14O4	[M-H]-	2-Propylglutaric acid	Organic acids	Organic acids	32806-62-5	B	460000	484000	436000	794000	801000	825000	372000	422000	390000	398000	509000	433000	601000	532000	526000	C16658	--
Zmyn000155	173.11	131.08	174.1	C7H14N2O3	[M-H]-	N-α-Acetyl-L-ornithine	Amino acids and derivatives	Amino acids and derivatives	6205/8/9	A	354000	413000	295000	967000	478000	595000	441000	351000	533000	531000	232000	594000	573000	486000	425000	C00437	ko00220,ko01100,ko01110,ko01210,ko01230
mws0260	175.12	116	174.112	C6H14N4O2	[M+H]+	L-Arginine	Amino acids and derivatives	Amino acids and derivatives	74-79-3	A	565000	639000	490000	599000	466000	630000	402000	421000	578000	404000	213000	401000	594000	573000	377000	C00062	ko00220,ko00261,ko00330,ko00472,ko00970,ko01100,ko01110,ko01230,ko02010
pme2559	174.04	88	175.048	C6H9NO5	[M-H]-	N-Acetyl-L-Aspartic Acid	Amino acids and derivatives	Amino acids and derivatives	997-55-7	B	354000	344000	365000	439000	229000	323000	304000	265000	291000	217000	168000	226000	318000	322000	276000	C01042	ko00250,ko01100
pme1651	176.1	130.1	175.063	C10H9NO2	[M+H]+	Indole 3-acetic acid (IAA)	Alkaloids	Plumerane	87-51-4	B	744000	787000	701000	585000	613000	532000	652000	753000	553000	271000	360000	305000	574000	442000	362000	C00954	ko00380,ko01100,ko04075
pme0008	176.1	113	175.096	C6H13N3O3	[M+H]+	L-Citrulline	Amino acids and derivatives	Amino acids and derivatives	372-75-8	B	57700	60700	54700	180000	106000	108000	46200	59100	60300	47600	50500	33900	90400	86400	83100	C00327	ko00220,ko01100,ko01110,ko01230
mws4175	175.02	85.03	176.032	C6H8O6	[M-H]-	D-Glucurono-6,3-lactone	Others	Saccharides and Alcohols	32449-92-6	B	19400	5230	33600	192000	192000	162000	165000	200000	227000	64400	121000	68400	75200	92700	111000	C02670	ko00053,ko01100
Hmfn000531	175.02	87.01	176.032	C6H8O6	[M-H]-	L-Ascorbic acid	Others	Vitamin	50-81-7	A	580000	191000	969000	4540000	6140000	4730000	5100000	7420000	7640000	1960000	3590000	2560000	2080000	3310000	2690000	C00072	ko00053,ko00480,ko01100,ko01110
Lmbn001754	175.06	115.04	176.068	C7H12O5	[M-H]-	3-Isopropylmalic Acid	Organic acids	Organic acids	921-28-8	A	518000	505000	531000	2090000	2480000	2710000	382000	714000	726000	260000	369000	302000	1110000	1050000	947000	C04411	ko00290,ko01100,ko01110,ko01210,ko01230
pmb3101	175.06	115	176.068	C7H12O5	[M-H]-	2-Isopropylmalic Acid	Organic acids	Organic acids	49601-06-1	A	550000	555000	546000	1900000	2470000	2740000	370000	695000	725000	287000	383000	339000	971000	1030000	938000	C02504	ko00290,ko00620,ko01100,ko01110,ko01210,ko01230
pmb0774	177.1	160.3	176.095	C10H12N2O	[M+H]+	N-Hydroxytryptamine	Alkaloids	Phenolamine	-	B	25900	21000	30800	119000	109000	104000	27400	25900	24500	14300	27500	15700	57400	46700	36100	C17203	ko00380,ko01100
pmf0367	177.02	88.9	178.027	C9H6O4	[M-H]-	5,7-Dihydroxychromone	Others	Others	31721-94-5	B	17000	11500	22500	116000	112000	75800	17600	19000	33200	30700	17100	11300	39900	33900	32100	C09001	--
mws0875	179.05	76	178.041	C5H10N2O3S	[M+H]+	L-Cysteinyl-L-glycine	Amino acids and derivatives	Amino acids and derivatives	19246-18-5	B	82100	73000	91200	132000	159000	103000	89000	82800	94200	80400	120000	105000	98100	108000	80300	C01419	ko00480,ko01100
pme2253	177.04	59	178.048	C6H10O6	[M-H]-	L-Gulono-1,4-Lactone	Others	Saccharides and Alcohols	1128-23-0	B	43800	43100	44500	40200	45100	44400	37000	47600	45600	40200	39600	54300	63500	38100	41400	C01040	ko00053,ko01100
pmb2795	177	145	178.063	C10H10O3	[M-H]-	4-Methoxycinnamic acid	Phenolic acids	Phenolic acids	830-09-1	B	85900	87000	84800	87300	68500	72300	144000	148000	145000	5240	2470	3800	44400	45100	42200	--	--
mws0981	178.04	136.02	179.044	C6H5N5O2	[M-H]-	Isoxanthopterin	Nucleotides and derivatives	Nucleotides and derivatives	529-69-1	B	16600	19100	14100	31500	14800	16900	30200	20000	25800	41000	48200	41200	27900	30700	24800	C03975	--
mws2212	179.03	135.05	180.042	C9H8O4	[M-H]-	Caffeic acid	Phenolic acids	Phenolic acids	331-39-5	A	631000	578000	684000	618000	733000	742000	553000	454000	411000	1510000	712000	1130000	863000	846000	754000	C01197	ko00940,ko01100,ko01110
pme0516	179.06	87	180.063	C6H12O6	[M-H]-	Inositol	Others	Saccharides and Alcohols	87-89-8	B	206000	221000	191000	159000	151000	114000	212000	193000	152000	328000	311000	286000	193000	188000	174000	C00137	ko00052,ko00053,ko00562,ko01100,ko01110,ko02010,ko04070
mws4170	179.06	59.01	180.063	C6H12O6	[M-H]-	D-Glucose	Others	Saccharides and Alcohols	14431-43-7	B	2730000	3390000	2080000	5460000	6430000	7570000	2420000	2830000	2680000	1240000	2060000	1800000	3730000	3460000	3310000	C00031	ko00010,ko00030,ko00052,ko00500,ko00520,ko00901,ko01100,ko01110,ko02010,ko04933
mws0250	182.08	136.1	181.074	C9H11NO3	[M+H]+	L-Tyrosine	Amino acids and derivatives	Amino acids and derivatives	60-18-4	A	12900000	13900000	11800000	10800000	13500000	11100000	12700000	13900000	13100000	16400000	10800000	12800000	15700000	13200000	12000000	C00082	ko00130,ko00261,ko00350,ko00360,ko00400,ko00460,ko00730,ko00940,ko00950,ko00965,ko00966,ko00970,ko00998,ko01100,ko01110,ko01210,ko01230
mws1350	181.05	151	182.058	C9H10O4	[M-H]-	Syringaldehyde; 4-Hydroxy-3,5-Dimethoxybenzaldehyde	Phenolic acids	Phenolic acids	134-96-3	B	18400	17400	19400	5530	9890	5150	15400	11900	11500	12300	9	9	8920	11700	10100	--	--
pme2237	181.07	101	182.079	C6H14O6	[M-H]-	Dulcitol*	Others	Saccharides and Alcohols	608-66-2	B	4440000	4380000	4500000	3540000	3670000	3760000	4080000	3440000	4110000	4260000	4890000	4980000	4420000	3790000	3940000	C01697	ko00052,ko01100
mws0214	181.07	71	182.079	C6H14O6	[M-H]-	D-Sorbitol*	Others	Saccharides and Alcohols	50-70-4	B	4230000	4390000	4070000	3380000	3740000	3600000	3810000	3470000	3730000	4250000	4780000	4930000	4080000	3720000	3990000	C00794	ko00051,ko00052,ko01100,ko02010
pme2596	184.06	148	183.053	C8H9NO4	[M+H]+	4-Pyridoxic acid	Others	Vitamin	82-82-6	B	131000	126000	137000	50100	33500	38500	153000	125000	83100	54100	73600	67700	110000	84500	86000	C00847	ko00750,ko01100
MA10002917	183.01	109.02	184.012	C6H4N2O5	[M-H]-	2,4-Dinitrophenol	Phenolic acids	Phenolic acids	51-28-5	B	35600	35100	36100	37800	50100	41400	41500	30800	29700	16200	14600	18700	27200	18200	21600	C02496	--
pme0309	183.03	124	184.037	C8H8O5	[M-H]-	3-O-Methylgallic Acid	Tannins	Tannin	3934-84-7	B	34300	36100	32500	87600	120000	88000	42400	32700	33900	41400	63700	58300	64800	56300	46100	C05616	--
Zmgn000447	184.98	78.96	185.993	C3H7O7P	[M-H]-	3-Phospho-D-glyceric acid	Others	Others	820-11-1	A	3290000	3020000	3560000	3950000	4610000	4080000	2180000	2310000	2930000	869000	836000	867000	3390000	2310000	2290000	C00197	ko00010,ko00030,ko00260,ko00270,ko00561,ko00630,ko00710,ko01100,ko01110,ko01200,ko01230
mws0752	185.15	185.16	186.162	C11H22O2	[M-H]-	Undecylic Acid	Lipids	Free fatty acids	112-37-8	B	614000	703000	524000	451000	530000	481000	582000	539000	633000	523000	511000	453000	571000	479000	478000	C17715	--
pmn001492	187.1	123.1	188.041	C11H8O3	[M-H]-	Ayapin	Lignans and Coumarins	Coumarins	494-56-4	B	91100	125000	57700	74000	138000	83500	63100	55100	52800	36500	41300	40700	75800	83900	66400	C18078	--
pme0137	187.07	125	188.08	C7H12N2O4	[M-H]-	N-Acetyl-L-Glutamine	Amino acids and derivatives	Amino acids and derivatives	2490-97-3	B	35900	25600	46200	56500	36400	43200	16200	30600	18600	30200	19500	21900	27200	41200	25800	--	--
mws0237	187.1	125	188.105	C9H16O4	[M-H]-	Anchoic Acid	Organic acids	Organic acids	123-99-9	A	1460000	1940000	981000	1310000	2110000	1540000	1060000	1060000	959000	627000	756000	853000	1280000	1310000	1110000	C08261	--
pme0122	189.12	126	188.116	C8H16N2O3	[M+H]+	N6-Acetyl-L-lysine	Amino acids and derivatives	Amino acids and derivatives	692-04-6	B	69000	83800	54100	33100	76500	57200	49200	55600	67700	30700	52600	30000	74600	55600	55700	C02727	ko00310,ko01100
mws0736	189.12	86	188.116	C8H16N2O3	[M+H]+	N-Glycyl-L-leucine*	Amino acids and derivatives	Amino acids and derivatives	869-19-2	A	271000	282000	259000	619000	715000	678000	242000	180000	243000	243000	330000	268000	453000	418000	353000	C02155	--
mws5041	189.12	86.1	188.116	C8H16N2O3	[M+H]+	L-Glycyl-L-isoleucine*	Amino acids and derivatives	Amino acids and derivatives	19461-38-2	A	194000	209000	179000	375000	527000	486000	168000	120000	184000	178000	224000	195000	325000	289000	265000	--	--
pme3388	189.13	144	188.127	C7H16N4O2	[M+H]+	Homoarginine*	Amino acids and derivatives	Amino acids and derivatives	156-86-5	A	33900	34000	33800	39500	35000	42000	37700	33600	38100	117000	65000	69600	50400	65900	39500	C01924	--
pme0075	188.06	128	189.064	C7H11NO5	[M-H]-	N-Acetyl-L-glutamic acid	Amino acids and derivatives	Amino acids and derivatives	1188-37-0	A	406000	419000	394000	848000	645000	656000	358000	309000	307000	250000	255000	256000	486000	448000	372000	C00624	ko00220,ko01100,ko01110,ko01210,ko01230
mws0193	190.12	127	189.111	C7H15N3O3	[M+H]+	L-Homocitrulline	Amino acids and derivatives	Amino acids and derivatives	1190-49-4	B	33300	42200	24300	33100	27400	29400	22400	38000	22100	15600	30300	20800	31600	40400	36500	C02427	--
pme0278	191.1	128	190.095	C7H14N2O4	[M+H]+	2,6-Diaminooimelic acid	Amino acids and derivatives	Amino acids and derivatives	583-93-7	B	277000	275000	279000	135000	190000	162000	153000	180000	210000	82600	103000	93600	228000	173000	158000	C00666	ko00300,ko01100,ko01110,ko01230
mws0597	190.05	146	191.058	C10H9NO3	[M-H]-	5-Hydroxyindole-3-acetic acid	Alkaloids	Plumerane	54-16-0	A	95800	81200	110000	82800	60800	81800	79900	93600	93400	144000	205000	171000	102000	97800	114000	C05635	ko00380,ko01100
pmb2561	190.1	84	191.062	C7H13NO3S	[M-H]-	N-Acetyl-L-methionine	Amino acids and derivatives	Amino acids and derivatives	65-82-7	B	20700	20300	21200	51400	35000	33300	30000	18600	14300	118000	29900	59200	39100	32100	34100	C02712	--
mws0281	191.02	111.01	192.027	C6H8O7	[M-H]-	Citric Acid	Organic acids	Organic acids	77-92-9	A	5340000	6040000	4650000	10300000	13900000	13400000	5160000	6270000	5710000	2990000	4000000	4370000	8230000	7580000	6790000	C00158	ko00020,ko00250,ko00630,ko01100,ko01110,ko01200,ko01210,ko01230
Zmyn000453	191.02	111.01	192.027	C6H8O7	[M-H]-	Isocitric Acid	Organic acids	Organic acids	320-77-4	A	13000000	13700000	12200000	19800000	23200000	26200000	10800000	11900000	11200000	6260000	5470000	6940000	16300000	15000000	14700000	C00311	ko00020,ko00630,ko01100,ko01110,ko01200,ko01210,ko01230
Hmjp002337	193.04	133.03	192.033	C10H8O4	[M+H]+	Isoscopoletin (6-Hydroxy-7-Methoxycoumarin)	Lignans and Coumarins	Coumarins	776-86-3	B	102000	115000	89100	122000	124000	92600	146000	106000	125000	171000	173000	154000	151000	150000	109000	C18079	--
pme2993	193.05	133	192.042	C10H8O4	[M+H]+	Scopoletin (7-Hydroxy-5-methoxycoumarin)	Lignans and Coumarins	Coumarins	92-61-5	B	77900	75800	80000	31600	12600	13100	107000	86600	76200	250000	202000	228000	110000	92300	91800	C01752	ko00940,ko01110
mws0277	191.06	85	192.063	C7H12O6	[M-H]-	Quinic Acid	Organic acids	Organic acids	77-95-2	A	4150000	4590000	3720000	6460000	7950000	9600000	2870000	3720000	3350000	2010000	1510000	1860000	5250000	4840000	4330000	C00296	ko00400,ko01100
pme3705	193.04	73	194.043	C6H10O7	[M-H]-	D-Glucoronic acid	Others	Saccharides and Alcohols	6556/12/3	B	184000	105000	264000	98700	97300	118000	162000	122000	149000	46800	76500	56500	132000	149000	97500	C00191	ko00040,ko00053,ko00520,ko00562,ko01100
mws0014	193.05	134.01	194.058	C10H10O4	[M-H]-	Ferulic acid	Phenolic acids	Phenolic acids	537-98-4	A	5020000	5260000	4780000	4590000	4790000	3810000	6680000	4260000	5450000	4070000	3140000	4090000	5480000	5060000	4770000	C01494	ko00940,ko01100,ko01110
Lmdn003756	193.05	135.05	194.058	C10H10O4	[M-H]-	Methyl caffeate	Phenolic acids	Phenolic acids	3843-74-1	B	260000	301000	220000	98200	44700	37700	259000	256000	237000	125000	138000	135000	175000	166000	155000	C10477	--
pme0534	195.05	74.9	196.058	C6H12O7	[M-H]-	Gluconic acid	Others	Saccharides and Alcohols	526-95-4	B	4040000	4420000	3660000	1480000	1550000	1700000	3690000	3200000	2640000	1140000	1410000	1180000	2550000	2450000	2200000	C00257	ko00030,ko01100,ko01110,ko01200
pme3827	198.08	152.2	197.069	C9H11NO4	[M+H]+	3,4-Dihydroxy-L-phenylalanine	Amino acids and derivatives	Amino acids and derivatives	59-92-7	A	7570000	7880000	7260000	9	16800	6620	50100	67800	53600	5850	9640	5650	2500000	2090000	1800000	C00355	ko00350,ko00950,ko00965,ko01100,ko01110
pmb2497	197	153	198.053	C9H10O5	[M-H]-	4-Hydroxy-3-methoxymandelate	Phenolic acids	Phenolic acids	1955/10/7	B	115000	136000	93500	103000	140000	108000	90200	116000	81300	70200	90000	120000	120000	107000	112000	C05584	ko00350,ko01100
mws0027	197.05	123	198.053	C9H10O5	[M-H]-	Syringic acid	Phenolic acids	Phenolic acids	530-57-4	B	36600	47800	25500	88600	110000	60700	56400	55800	54600	26200	38900	29200	48900	49000	44700	C10833	--
Zmzn000079	199	78.96	200.009	C4H9O7P	[M-H]-	D-Erythrose-4-phosphate	Others	Saccharides and Alcohols	585-18-2	B	52300	52400	52300	104000	146000	106000	41300	30900	46100	36700	49200	42500	73700	73800	73800	C00279	ko00030,ko00400,ko00710,ko00750,ko00998,ko01100,ko01110,ko01200,ko01230
pmb2640	199.17	181	200.178	C12H24O2	[M-H]-	Lauric acid	Organic acids	Organic acids	143-07-7	B	12600	15400	9820	8740	8960	7370	8060	6860	7630	8780	9800	8950	10500	8010	7460	C02679	ko00061,ko01100,ko01110
NK10251888	203.15	70.07	202.143	C8H18N4O2	[M+H]+	NG,NG-Dimethyl-L-arginine	Amino acids and derivatives	Amino acids and derivatives	30315-93-6	B	45000	49500	40500	89000	79900	78700	52100	44100	47500	89100	73300	86000	91700	75000	73500	C03626	--
mws0018	203.22	83	202.216	C10H26N4	[M+H]+	Spermine	Alkaloids	Phenolamine	71-44-3	B	8860000	10000000	7680000	12900000	13500000	15900000	8390000	9700000	7800000	8700000	9760000	10900000	12200000	10900000	10900000	C00750	ko00330,ko00410,ko00480,ko01100
mws0282	203.08	116.05	204.09	C11H12N2O2	[M-H]-	L-Tryptophan	Amino acids and derivatives	Amino acids and derivatives	73-22-3	A	9300000	10500000	8080000	9800000	9590000	10200000	10400000	9740000	8700000	10000000	6640000	9460000	10900000	9570000	9380000	C00078	ko00260,ko00380,ko00400,ko00901,ko00966,ko00970,ko00998,ko01100,ko01110,ko01210,ko01230
Zmtn001464	204.03	160.04	205.038	C10H7NO4	[M-H]-	4,8-Dihydroxyquinoline-2-carboxylic acid	Organic acids	Organic acids	59-00-7	B	26700	29000	24400	80000	84000	94100	22000	16200	22800	143000	140000	113000	64000	77700	63300	C02470	ko00380
pmb0818	206.1	147.5	205.074	C11H11NO3	[M+H]+	Methoxyindoleacetic acid	Alkaloids	Plumerane	3471-31-6	B	240000	269000	210000	243000	235000	260000	251000	225000	219000	228000	151000	208000	280000	244000	222000	C05660	ko00380
pme1261	206.14	76	205.131	C9H19NO4	[M+H]+	D-Panthenol	Others	Saccharides and Alcohols	81-13-0	B	36000	18800	53200	8990	32500	41800	15600	60100	71200	10300	68300	48400	36100	34700	30600	C05944	ko00770
Lmln010063	205.16	189.13	206.167	C14H22O	[M-H]-	2,6-Di-t-butylphenol	Phenolic acids	Phenolic acids	128-39-2	B	1810000	2000000	1620000	1520000	1470000	1610000	1460000	1780000	1710000	1260000	1320000	1130000	1330000	1310000	1120000	--	--
Zmgn002106	206.08	58.03	207.09	C11H13NO3	[M-H]-	N-Acetyl-L-phenylalanine	Amino acids and derivatives	Amino acids and derivatives	2018-61-3	B	445000	481000	410000	385000	380000	432000	368000	364000	271000	2220000	727000	1120000	731000	667000	574000	C03519	ko00360,ko01100
mws1014	209.04	149.1	208.037	C10H8O5	[M+H]+	Fraxetin (7,8-Dihydroxy-6-methoxycoumarin)	Lignans and Coumarins	Coumarins	574-84-5	B	55000	56500	53500	85100	143000	125000	42100	45000	37800	14600	56500	51600	80300	52000	66100	C09265	--
pme3443	207.07	192	208.074	C11H12O4	[M-H]-	Sinapinaldehyde	Phenolic acids	Phenolic acids	4206-58-0	B	28000	30400	25500	10000	7250	6210	26800	15300	16800	50600	18600	20100	25700	19000	15900	C05610	ko00940,ko01100,ko01110
pmb2620	207.07	133.1	208.074	C11H12O4	[M-H]-	3,4-Dimethoxycinnamic acid	Phenolic acids	Phenolic acids	14737-89-4	B	5380	5060	5690	5620	7780	4920	3820	3840	4280	478	126	1150	5490	2920	3130	--	--
Zmpn000199	209.03	85.03	210.038	C6H10O8	[M-H]-	D-Galactaric acid*	Others	Saccharides and Alcohols	526-99-8	A	3800000	3570000	4040000	2900000	2460000	3900000	3220000	3090000	3470000	1340000	2630000	1580000	2940000	3090000	3310000	C00879	ko00053,ko01100
Zmyn000108	209.03	85.03	210.038	C6H10O8	[M-H]-	D-Saccharic acid*	Others	Saccharides and Alcohols	87-73-0	A	3380000	3300000	3460000	2910000	2710000	4080000	3330000	3410000	3630000	1480000	2520000	1560000	3160000	3280000	3390000	C00818	ko00053,ko01100
Hmcn000192	209.07	59.01	210.073	C7H14O7	[M-H]-	Sedoheptulose	Others	Saccharides and Alcohols	3019-74-7	B	1390000	1350000	1440000	946000	919000	1280000	1140000	1160000	1240000	612000	1090000	648000	1160000	1110000	1280000	C02076	ko00710,ko01100
mws0863	213.02	97	214.024	C5H11O7P	[M-H]-	2-Deoxyribose-5'-phosphate	Nucleotides and derivatives	Nucleotides and derivatives	102916-66-5	B	40100	48200	31900	11500	15500	21500	21500	25400	35000	10500	9980	14800	29600	14600	24900	C00673	ko00030,ko01100
mws5045	215.17	169.16	216.173	C12H24O3	[M-H]-	12-Hydroxydodecanoic acid	Lipids	Free fatty acids	505-95-3	B	5650	7130	4160	20400	21200	16400	2370	4310	3510	9	9	9	4640	5740	6530	C08317	--
mws1337	220.12	202.1	219.111	C9H17NO5	[M+H]+	D-Pantothenic Acid	Others	Vitamin	79-83-4	B	2990000	2950000	3030000	4150000	3780000	3700000	2780000	2470000	3110000	1310000	1430000	1510000	3290000	2760000	2530000	C00864	ko00410,ko00770,ko01100,ko01110
pme1228	221.09	204	220.085	C11H12N2O3	[M+H]+	5-Hydroxy-L-tryptophan	Amino acids and derivatives	Amino acids and derivatives	56-69-9	B	41100	35700	46500	26000	20300	19800	31100	31800	29800	40100	31300	38100	39000	33400	32000	C00643	ko00380,ko01100
mws2608	222.1	84.05	221.09	C8H15NO6	[M+H]+	N-Acetyl-D-galactosamine*	Others	Saccharides and Alcohols	1811-31-0	B	152000	149000	155000	313000	443000	331000	166000	154000	153000	97200	135000	86800	266000	244000	199000	C01132	ko00052,ko01100
mws4174	222.1	138	221.09	C8H15NO6	[M+H]+	N-Acetyl-D-mannosamine*	Others	Saccharides and Alcohols	7772-94-3	B	522000	518000	526000	1390000	1540000	1070000	569000	581000	517000	335000	356000	312000	681000	750000	657000	C00645	ko00520,ko01100
mws5042	223.11	120.09	222.1	C11H14N2O3	[M+H]+	L-Glycyl-L-phenylalanine	Amino acids and derivatives	Amino acids and derivatives	721-66-4	B	103000	111000	94700	212000	235000	245000	91600	68000	91300	95900	104000	106000	171000	143000	127000	--	--
mws4085	223.06	193	224.068	C11H12O5	[M-H]-	Sinapic acid	Phenolic acids	Phenolic acids	530-59-6	A	251000	287000	216000	206000	178000	193000	319000	222000	249000	149000	201000	239000	265000	256000	207000	C00482	ko00940,ko01100,ko01110
pmb2643	225.19	207	226.193	C14H26O2	[M-H]-	Myristoleic acid	Lipids	Free fatty acids	544-64-9	A	6560	9830	3280	8870	4610	1340	1250	3000	2700	9	9	9	4380	4450	3920	C08322	--
pme1194	228.1	112	227.091	C9H13N3O4	[M+H]+	2'-Deoxycytidine	Nucleotides and derivatives	Nucleotides and derivatives	951-77-9	B	86400	97700	75000	69400	154000	98500	84900	82000	69500	112000	140000	105000	125000	103000	91500	C00881	ko00240,ko01100,ko02010
pme3882	227.1	184	228.075	C9H12N2O5	[M-H]-	2'-Deoxyuridine	Nucleotides and derivatives	Nucleotides and derivatives	951-78-0	B	5270	6680	3860	8570	11300	9970	4340	4930	6330	3770	5080	4440	6780	9530	6890	C00526	ko00240,ko01100,ko02010
Zmjn003398	227.13	183.14	228.136	C12H20O4	[M-H]-	2-Dodecenedioic acid	Lipids	Free fatty acids	6402-36-4	B	57800	91700	24000	126000	86300	79600	22900	7690	20000	1620	1280	1300	23000	16000	16000	C16308	ko00592,ko01110
mws0119	227.2	227.2	228.209	C14H28O2	[M-H]-	Myristic Acid	Lipids	Free fatty acids	544-63-8	A	18700000	28100000	9350000	10000000	10400000	8710000	7830000	9080000	8320000	16600000	22700000	19700000	14700000	14100000	12400000	C06424	ko00061,ko01100
pmb0962	235.1	118.3	234.158	C10H22N2O4	[M+H]+	L-Lysine-Butanoic Acid	Amino acids and derivatives	Amino acids and derivatives	80407-71-2	B	38900000	44200000	33600000	37500000	37100000	35100000	36300000	35900000	36900000	41800000	44500000	37900000	36000000	34900000	39300000	--	--
mws4176	237.12	120.09	236.116	C12H16N2O3	[M+H]+	L-Alanyl-L-Phenylalanine	Amino acids and derivatives	Amino acids and derivatives	3061-90-3	B	20500	17500	23500	57800	82300	98200	25200	15400	30300	16400	18700	17800	40400	43800	32300	--	--
Lmzn001925	239.09	195.1	240.1	C12H16O5	[M-H]-	3,4'-Dihydroxy-3'-methoxybenzenepentanoic acid	Phenolic acids	Phenolic acids	-	A	6140	4530	7750	11600	6740	11900	5400	7740	6060	5720	15500	9920	9440	4390	6390	--	--
pme2827	239	223	240.245	C16H32O	[M-H]-	Palmitaldehyde	Others	Others	629-80-1	B	6080000	5920000	6230000	8100000	6070000	6780000	6240000	5870000	5940000	2150000	2330000	2250000	5780000	5910000	8370000	C00517	ko00071
pme0264	243.1	127	242.09	C10H14N2O5	[M+H]+	Thymidine	Nucleotides and derivatives	Nucleotides and derivatives	50-89-5	A	209000	253000	165000	328000	451000	370000	209000	185000	223000	141000	171000	151000	288000	262000	234000	C00214	ko00240,ko01100
Zmyn005209	241.22	225.02	242.225	C15H30O2	[M-H]-	12-Methyltetradecanoic Acid	Lipids	Free fatty acids	5502-94-3	A	21300	24100	18600	16400	26200	22800	196000	9	9	19000	18900	25500	188000	180000	199000	C16665	--
mws0359	241.22	241.22	242.225	C15H30O2	[M-H]-	Pentadecanoic Acid	Lipids	Free fatty acids	1002-84-2	A	428000	516000	341000	524000	521000	430000	358000	356000	367000	530000	553000	613000	562000	513000	517000	C16537	--
ML10180524	244.09	112.05	243.086	C9H13N3O5	[M+H]+	Cytarabine	Nucleotides and derivatives	Nucleotides and derivatives	147-94-4	A	1700000	1610000	1780000	1390000	2380000	1930000	1650000	1860000	1600000	2770000	3730000	3220000	2190000	2270000	2080000	C02961	--
pme3732	244.09	112	243.086	C9H13N3O5	[M+H]+	Cytidine	Nucleotides and derivatives	Nucleotides and derivatives	65-46-3	A	4000000	3150000	4850000	3120000	3950000	3650000	3490000	3400000	3080000	4200000	4770000	3970000	4520000	3870000	3100000	C00475	ko00240,ko01100,ko02010
mws0248	243.06	110	244.07	C9H12N2O6	[M-H]-	Uridine	Nucleotides and derivatives	Nucleotides and derivatives	58-96-8	A	3010000	3340000	2680000	7190000	5340000	6020000	2840000	2590000	3060000	2770000	4740000	3080000	4790000	4600000	3700000	C00299	ko00240,ko01100,ko02010
pme2266	245.1	227	244.088	C10H16N2O3S	[M+H]+	Biotin	Others	Vitamin	58-85-5	B	135000	135000	136000	263000	301000	298000	55100	78000	67700	343000	415000	430000	245000	219000	204000	C00120	ko00780,ko01100,ko02010
pmb2591	245.09	203.2	246.1	C13H14N2O3	[M-H]-	N-Acetyl-L-Tryptophan	Amino acids and derivatives	Amino acids and derivatives	1218-34-4	A	4260000	4700000	3820000	2580000	2500000	2160000	6100000	4610000	4010000	9360000	7080000	9010000	5080000	4780000	4570000	--	--
Lmrj002087	247.13	86.09	246.121	C10H18N2O5	[M+H]+	L-Isoleucyl-L-Aspartate	Amino acids and derivatives	Amino acids and derivatives	-	A	42000	37800	46300	76500	107000	169000	24800	18500	36100	19200	28800	28200	83600	60800	58200	--	--
pme2563	249.06	128	250.062	C8H14N2O5S	[M-H]-	γ-Glu-Cys	Amino acids and derivatives	Amino acids and derivatives	636-58-8	A	153000	151000	155000	357000	380000	253000	165000	165000	250000	78400	93500	132000	243000	221000	207000	C00669	ko00480,ko01100
pme3961	252.11	136	251.102	C10H13N5O3	[M+H]+	2'-Deoxyadenosine	Nucleotides and derivatives	Nucleotides and derivatives	958-09-8	B	634000	789000	479000	470000	1050000	729000	1080000	770000	687000	162000	255000	180000	779000	671000	583000	C00559	ko00230,ko01100,ko02010
mws0361	253.22	235.19	254.225	C16H30O2	[M-H]-	Palmitoleic Acid	Lipids	Free fatty acids	373-49-9	A	73000	113000	33400	86900	84100	33000	21400	41700	32900	35200	45600	63500	61700	59200	51700	C08362	ko00061
pma3101	256.2	124.1	256.082	C11H14NO6+	[M+H]+	Nicotinate D-ribonucleoside	Others	Vitamin	17720-18-2	B	1140000	1130000	1140000	1700000	2040000	1590000	1140000	980000	943000	4320000	3540000	2980000	2140000	2060000	1680000	C05841	ko00760,ko01100
mws0120	258.11	104.11	257.103	C8H20NO6P	[M+H]+	Choline Alfoscerate	Lipids	PC	28319-77-9	A	549000	422000	675000	537000	360000	540000	391000	269000	543000	137000	167000	112000	515000	470000	399000	C00670	ko00564,ko00565
Zmyn000110	258.04	78.96	259.046	C6H14NO8P	[M-H]-	D-Glucosamine 1-phosphate	Others	Saccharides and Alcohols	2152-75-2	B	42900	40100	45600	127000	136000	97900	20900	38800	31300	36800	29100	29500	68000	64600	59400	C06156	ko00520,ko01100
pme3313	259	97	260.03	C6H13O9P	[M-H]-	D-Fructose 6-phosphate	Others	Saccharides and Alcohols	643-13-0	B	2300000	2300000	2300000	1500000	2180000	2060000	1530000	1290000	1710000	1050000	626000	1020000	2310000	1450000	1210000	C00085	ko00052,ko00500,ko00710,ko01100,ko01110,ko01200
Zmpn000095	261.04	78.96	262.045	C6H15O9P	[M-H]-	Sorbitol-6-phosphate	Others	Saccharides and Alcohols	20479-58-7	A	139000	120000	158000	111000	108000	97300	138000	107000	124000	78800	96900	96400	106000	108000	118000	C01096	ko00051,ko01100
Lmhp001732	263.13	70.07	263.139	C14H18N2O3	[M+H]+	L-Prolyl-L-Phenylalanine	Amino acids and derivatives	Amino acids and derivatives	13589-02-1	B	58000	65300	50600	97100	80900	103000	61800	101000	96100	43300	36200	41200	84200	71400	65500	--	--
mws0715	263.1	145	264.111	C13H16N2O4	[M-H]-	Phenylacetyl-L-glutamine	Amino acids and derivatives	Amino acids and derivatives	28047-15-6	A	8720000	9260000	8190000	5210000	4000000	6780000	9870000	8620000	7350000	7670000	7510000	6860000	8220000	7620000	6950000	C04148	ko00360
Lmtn004049	263.13	204.12	264.136	C15H20O4	[M-H]-	Abscisic acid	Organic acids	Organic acids	21293-29-8	B	61800	59300	64200	80700	70700	92400	60900	77900	64700	26900	31500	31300	62500	60900	48300	C06082	ko00906,ko01100,ko01110,ko04075
Lmhp002001	265.15	72.08	265.155	C14H20N2O3	[M+H]+	L-Valyl-L-Phenylalanine	Amino acids and derivatives	Amino acids and derivatives	3918-92-1	B	92700	68500	117000	149000	194000	216000	92600	62600	102000	105000	125000	96300	138000	132000	113000	--	--
Hmsn000210	133.01	115.01	266.224	C17H30O2	[M-H]-	Methyl 7,10-hexadecadienoate	Lipids	Free fatty acids	-	B	3970000	4630000	3310000	4770000	6600000	6430000	2710000	3190000	2650000	2080000	2740000	2450000	4630000	4090000	4060000	--	--
pme1184	268.1	152	267.097	C10H13N5O4	[M+H]+	2'-Deoxyguanosine	Nucleotides and derivatives	Nucleotides and derivatives	961-07-9	A	1340000	1550000	1120000	1130000	2240000	1620000	2360000	1680000	1210000	808000	594000	494000	1630000	1520000	1370000	C00330	ko00230,ko01100,ko02010
pme0230	268.1	136.06	267.097	C10H13N5O4	[M+H]+	Adenosine	Nucleotides and derivatives	Nucleotides and derivatives	58-61-7	A	6210000	5080000	7340000	6440000	6930000	6990000	9630000	8190000	8230000	7440000	6960000	6890000	7700000	7200000	6270000	C00212	ko00230,ko01100,ko02010
pme2890	269.06	136	268.055	C8H16N2O4S2	[M+H]+	L-Homocystine	Amino acids and derivatives	Amino acids and derivatives	626-72-2	B	11200	10500	12000	15500	29500	26600	10500	4520	7440	11100	14000	11900	15900	13200	15400	C01817	ko00270
mws1060	267.07	135	268.081	C10H12N4O5	[M-H]-	9-(Arabinosyl)hypoxanthine	Nucleotides and derivatives	Nucleotides and derivatives	7013-16-3	A	1010000	1040000	977000	1890000	1980000	1210000	1280000	1440000	1380000	1340000	1510000	1710000	1480000	1470000	1380000	--	--
pmp000086	269.1	177.05	268.095	C13H16O6	[M+H]+	1-Feruloyl-sn-glycerol	Phenolic acids	Phenolic acids	-	B	66900	72400	61300	69800	87700	75500	73800	65900	75200	88100	163000	119000	84600	77700	71700	--	--
mws0383	267.23	267.23	268.24	C17H32O2	[M-H]-	Cis-10-Heptadecenoic Acid	Lipids	Free fatty acids	29743-97-3	B	1180000	1530000	838000	1900000	2080000	2400000	887000	912000	1020000	3850000	5930000	4570000	2530000	2270000	2160000	--	--
mws1297	269.1	101.02	270.11	C13H18O6	[M-H]-	Benzyl glucoside	Phenolic acids	Phenolic acids	4304/12/5	A	20700	21800	19500	37600	28700	31800	9890	10700	16200	16300	20900	13800	17000	27200	13200	--	--
Lmmn003323	271.23	225.22	272.235	C16H32O3	[M-H]-	2-Hydroxyhexadecanoic acid	Organic acids	Organic acids	764-67-0	B	1810000	1790000	1830000	6000000	7770000	7340000	1800000	1860000	1860000	4330000	6120000	4820000	4210000	4090000	3710000	--	--
pme1712	275	257	276.132	C11H20N2O6	[M-H]-	L-Saccharopine	Amino acids and derivatives	Amino acids and derivatives	997-68-2	B	160000	177000	143000	219000	191000	182000	153000	218000	170000	70200	79500	115000	151000	188000	169000	C00449	ko00300,ko00310,ko01100,ko01110,ko01230
mws1038	277.12	146	278.13	C11H22N2O4S	[M-H]-	Pantetheine	Others	Others	496-65-1	B	181000	199000	163000	621000	574000	501000	233000	194000	268000	373000	451000	426000	369000	366000	321000	C00831	ko00332,ko00770,ko01110
Lmlp012720	279.16	149.02	278.152	C16H22O4	[M+H]+	Dibutyl phthalate	Phenolic acids	Phenolic acids	84-74-2	A	17900000	18900000	17000000	12600000	11900000	12000000	12300000	11400000	14000000	10400000	9740000	9200000	14500000	11700000	10600000	C14214	--
pmb0889	279.23	95.1	278.225	C18H30O2	[M+H]+	Punicic acid (9Z,11E,13Z-octadecatrienoic acid)	Lipids	Free fatty acids	544-72-9	B	898000	1100000	699000	883000	863000	1200000	513000	770000	643000	807000	1340000	1070000	1040000	904000	946000	C08364	--
pmb1650	279.2	149.4	278.225	C18H30O2	[M+H]+	Octadeca-11E,13E,15Z-trienoic acid	Lipids	Glycerol ester	25575-00-2	B	5600000	5690000	5500000	3920000	3610000	3690000	3950000	3420000	4250000	3120000	2970000	2730000	4460000	3390000	3140000	--	--
mws0367	277.22	277.22	278.225	C18H30O2	[M-H]-	α-Linolenic Acid*	Lipids	Free fatty acids	463-40-1	B	13500000	14100000	13000000	17300000	18500000	19100000	12700000	13700000	14900000	27300000	31100000	29800000	24600000	22700000	21500000	C06427	ko00592,ko01040,ko01100,ko01110
Lmbn005923	277.22	59.01	278.225	C18H30O2	[M-H]-	Crepenynic acid	Lipids	Free fatty acids	2277-31-8	A	215000	223000	207000	276000	290000	312000	202000	210000	228000	427000	506000	479000	378000	358000	354000	C07289	ko00591
mws0366	277.22	277.22	278.225	C18H30O2	[M-H]-	γ-Linolenic Acid*	Lipids	Free fatty acids	506-26-3	B	13300000	14000000	12700000	17700000	18500000	19500000	12700000	13700000	15300000	26800000	30300000	29200000	23800000	21500000	20900000	C06426	ko00591,ko01040,ko01100
Lmhn002926	279.05	163.04	280.058	C13H12O7	[M-H]-	p-Coumaroylmalic acid	Phenolic acids	Phenolic acids	-	A	2700000	2720000	2680000	1180000	1200000	790000	4620000	4200000	3700000	204000	189000	200000	2360000	2260000	1990000	--	--
mws0629	281.11	166	280.106	C13H16N2O5	[M+H]+	L-Aspartyl-L-Phenylalanine	Amino acids and derivatives	Amino acids and derivatives	13433-09-5	B	26700	25200	28300	40600	34700	39700	25000	26200	24100	22100	25300	28500	33200	26800	27700	--	--
Lmbn006152	279.23	59.01	280.24	C18H32O2	[M-H]-	(9Z,11E)-Octadecadienoic acid	Lipids	Free fatty acids	2540-56-9	A	134000	137000	131000	135000	127000	138000	129000	118000	128000	207000	224000	229000	165000	160000	163000	C04056	ko00591
mws1491	279.23	279.23	280.24	C18H32O2	[M-H]-	Linoleic acid	Lipids	Free fatty acids	60-33-3	A	41900000	41800000	42000000	44000000	44100000	46700000	41300000	40100000	41400000	64400000	69300000	66200000	54900000	52200000	53000000	C01595	ko00591,ko01040,ko01100
YC512118	282.28	247.24	281.272	C18H35NO	[M+H]+	Oleamide (9-Octadecenamide)	Lipids	Free fatty acids	301-02-0	B	35200	44900	25400	33800	38000	20300	88100	30900	24100	38700	47700	51700	80200	71000	59000	C19670	--
mws2623	281.25	281.25	282.256	C18H34O2	[M-H]-	11-Octadecanoic acid(Vaccenic acid)	Lipids	Free fatty acids	506-17-2	A	17600000	19200000	15900000	27600000	27700000	26500000	15100000	16500000	15000000	34100000	34200000	33600000	37300000	30400000	27900000	C21944	--
mws0396	281.25	281.25	282.256	C18H34O2	[M-H]-	Elaidic Acid	Lipids	Free fatty acids	112-79-8	B	19200000	20600000	17700000	30000000	31800000	30400000	16400000	17800000	16600000	38900000	38800000	37500000	42400000	34600000	32900000	C01712	--
pme1178	284.1	152	283.092	C10H13N5O5	[M+H]+	Guanosine	Nucleotides and derivatives	Nucleotides and derivatives	118-00-3	A	25700000	23500000	27900000	28300000	29000000	30000000	28800000	22800000	25700000	32100000	29000000	29200000	30300000	28800000	27300000	C00387	ko00230,ko01100,ko02010
Lmhn002051	283.05	167.04	284.053	C12H12O8	[M-H]-	Vnilloylmalic acid	Phenolic acids	Phenolic acids	-	B	573000	611000	535000	587000	540000	513000	1070000	1210000	859000	506000	359000	398000	675000	654000	626000	--	--
mws0668	283.07	151	284.076	C10H12N4O6	[M-H]-	Xanthosine	Nucleotides and derivatives	Nucleotides and derivatives	146-80-5	A	1870000	1720000	2030000	2240000	1580000	1620000	2450000	1810000	1630000	2650000	1330000	2410000	1880000	1750000	1860000	C01762	ko00230,ko00232,ko01100,ko01110,ko02010
mws1489	283.26	283.26	284.272	C18H36O2	[M-H]-	Stearic Acid	Lipids	Free fatty acids	1957/11/4	B	65400000	62000000	68800000	58100000	61400000	64800000	60900000	59400000	61600000	59100000	74600000	75500000	26300000	25300000	24900000	C01530	ko00061,ko01040
Zmyn005026	283.26	283.26	284.272	C18H36O2	[M-H]-	16-Methylheptadecanoic acid	Lipids	Free fatty acids	2724-58-5	B	21300000	25100000	17500000	14600000	21800000	19600000	20800000	14000000	13100000	10100000	13700000	18900000	51200	72100	52400	C20356	--
mws1521	285.1	121.03	286.105	C13H18O7	[M-H]-	Salicin	Phenolic acids	Phenolic acids	138-52-3	B	64600	68500	60600	82400	90000	94500	40400	45100	43500	75200	78300	67300	70100	62700	70100	C01451	ko00010
pme3163	289	97	290.04	C7H15O10P	[M-H]-	D-Sedoheptuiose 7-phosphate	Others	Saccharides and Alcohols	2646-35-7	B	3570000	4050000	3080000	9810000	6740000	5840000	6340000	7280000	4810000	2200000	3800000	2770000	6100000	6100000	4780000	--	--
pmb2657	289.1	97.1	290.123	C10H18N4O6	[M-H]-	Argininosuccinic acid	Organic acids	Organic acids	2387-71-5	B	478000	462000	495000	345000	408000	327000	425000	367000	481000	288000	285000	255000	421000	399000	378000	C03406	ko00220,ko00250,ko01100,ko01110,ko01230
Zmyn004548	291.2	235.17	292.204	C18H28O3	[M-H]-	12-Oxo-phytodienoic acid	Lipids	Free fatty acids	85551-10-6	B	4240	4570	3910	6180	5700	7240	3610	2690	4140	2090	2310	1940	4540	3990	3670	C01226	ko00592,ko01100,ko01110
Zmpn003368	293.21	195.14	294.219	C18H30O3	[M-H]-	13S-Hydroxy-9Z,11E,15Z-octadecatrienoic acid	Lipids	Free fatty acids	87984-82-5	B	183000	186000	180000	154000	156000	253000	98500	152000	160000	24400	71100	44300	153000	142000	134000	C16316	ko00592
Lmbn005443	293.21	235.17	294.219	C18H30O3	[M-H]-	13-KODE; (9Z,11E)-13-Oxooctadeca-9,11-dienoic acid	Lipids	Free fatty acids	54739-30-9	B	18800	20000	17600	22800	24100	27700	19300	18800	18900	42200	76300	64300	35000	32000	29100	C14765	ko00591
pmb2799	295.23	195.2	296.235	C18H32O3	[M-H]-	12,13-Epoxy-9-Octadecenoic Acid	Lipids	Free fatty acids	6799-85-5	A	31200	35200	27200	67800	62000	73000	26100	34200	31600	111000	165000	152000	79600	72100	71700	C14826	ko00591,ko01100
Rfmb091	295.23	195.14	296.235	C18H32O3	[M-H]-	9S-Hydroxy-10E,12Z-octadecadienoic acid	Lipids	Free fatty acids	15514-85-9	A	772000	970000	574000	779000	785000	1090000	478000	774000	606000	534000	973000	781000	907000	798000	775000	C14767	ko00591
pme1474	298.1	136	297.09	C11H15N5O3S	[M+H]+	5'-Deoxy-5'-(methylthio)adenosine	Nucleotides and derivatives	Nucleotides and derivatives	2457-80-9	A	4490000	4230000	4750000	2610000	2110000	2920000	4650000	5890000	4400000	5040000	4930000	4760000	4640000	4190000	4190000	C00170	ko00270,ko00908,ko01100
pmb0197	298.1	166.3	297.107	C11H15N5O5	[M+H]+	N7-Methylguanosine	Nucleotides and derivatives	Nucleotides and derivatives	20244-86-4	B	184000	176000	192000	514000	504000	484000	259000	215000	192000	531000	327000	420000	345000	325000	306000	C20674	--
Zmyn004714	297.24	183.14	298.251	C18H34O3	[M-H]-	Ricinoleic acid	Lipids	Free fatty acids	141-22-0	A	112000	127000	96500	101000	127000	96200	88900	126000	95400	481000	1170000	763000	328000	305000	297000	C08365	--
ML10195036	300.3	60.05	299.282	C18H37NO2	[M+H]+	3-Dehydrosphinganine	Lipids	Sphingolipids	16105-69-4	B	40300	43500	37100	57800	70500	52800	63600	44000	52600	62700	38800	48400	62600	47900	47300	C02934	ko00600,ko01100
Zmhn001358	299.08	137.02	300.084	C13H16O8	[M-H]-	4-O-Glucosyl-4-hydroxybenzoic acid	Phenolic acids	Phenolic acids	-	A	848000	826000	870000	2730000	3060000	2480000	962000	976000	941000	670000	1250000	963000	1390000	1430000	1360000	--	--
Zmhn001926	299.08	137.02	300.084	C13H16O8	[M-H]-	1-O-Salicyl-D-glucose	Phenolic acids	Phenolic acids	60517-74-0	A	2720000	3240000	2200000	5180000	8560000	6920000	2010000	2470000	2010000	720000	1180000	921000	3400000	3340000	3010000	--	--
Zmyn005384	299.26	253.26	300.266	C18H36O3	[M-H]-	2R-Hydroxyoctadecanoic Acid	Lipids	Free fatty acids	26633-48-7	B	4680	6430	2920	7440	8800	6610	4350	4010	3930	5060	6030	8510	6150	4840	5270	C03042	--
pmb3079	300.05	96.9	301.056	C8H16NO9P	[M-H]-	N-Acetyl-D-glucosamine-1-phosphate	Others	Saccharides and Alcohols	6866-69-9	A	26100	11400	40800	28500	34600	23900	58600	47200	55400	111000	58700	98200	39900	38900	42800	C04256	--
pme1373	306.05	110	307.057	C9H14N3O7P	[M-H]-	2'-Deoxycytidine-5'-monophosphate	Nucleotides and derivatives	Nucleotides and derivatives	1032-65-1	B	16500	18700	14400	37700	25400	22500	23100	21000	25400	26600	33000	32200	26900	27800	23100	C00239	ko00240,ko01100
pme1086	306.08	143	307.084	C10H17N3O6S	[M-H]-	Glutathione reduced form	Amino acids and derivatives	Amino acids and derivatives	70-18-8	A	2540000	2420000	2660000	4520000	4180000	4210000	3130000	2760000	3070000	3510000	3690000	3920000	3800000	3450000	2940000	C00051	ko00270,ko00480,ko01100,ko02010
pmb2855	307	145	308.122	C11H20N2O8	[M-H]-	L-Glutamine-O-glycoside	Amino acids and derivatives	Amino acids and derivatives	-	B	225000	278000	172000	521000	802000	960000	158000	225000	232000	38200	66100	77500	360000	338000	288000	--	--
pmn001610	307.26	307.3	308.272	C20H36O2	[M-H]-	Eicosadienoic acid	Lipids	Free fatty acids	5598-38-9	B	1210000	1300000	1120000	1410000	1590000	1540000	1090000	1060000	1180000	4100000	6370000	5630000	2460000	2310000	2140000	C16525	ko01040
Lmhn003074	309.06	193.05	310.069	C14H14O8	[M-H]-	Feruloylmalic acid	Phenolic acids	Phenolic acids	-	A	4420000	3290000	5550000	7590000	7210000	4430000	12700000	9080000	8520000	858000	777000	560000	6610000	5460000	5630000	--	--
pmb2791	309.21	209.1	310.1	C18H30O4	[M-H]-	9-Hydroperoxy-10E,12,15Z-octadecatrienoic acid	Lipids	Free fatty acids	111004-08-1	B	64600	115000	14600	20900	30100	19800	30600	42600	79100	8420	9870	51500	31000	26400	25300	C16321	ko00592,ko01110
pmb2789	309	209	310.214	C18H30O4	[M-H]-	13S-Hydroperoxy-6Z,9Z,11E-octadecatrienoic acid	Lipids	Free fatty acids	121107-97-9	B	102000	186000	19200	26600	44100	17700	48800	67300	142000	13500	15900	86300	41000	39700	39900	--	--
pmn001606	309.28	309.28	310.287	C20H38O2	[M-H]-	Eicosenoic acid	Lipids	Free fatty acids	26764-41-0	B	2510000	2980000	2050000	1600000	4540000	5530000	16000000	1400000	2080000	1390000	29000000	49800000	34600	52300	91800	C16526	ko01040
pme3967	312.13	180	311.123	C12H17N5O5	[M+H]+	2-(Dimethylamino)guanosine	Nucleotides and derivatives	Nucleotides and derivatives	2140-67-2	A	1350000	1280000	1420000	941000	1330000	979000	1580000	1380000	1350000	1590000	1410000	1340000	1540000	1310000	1180000	--	--
mws0636	313.15	166	312.147	C18H20N2O3	[M+H]+	L-Phenylalanyl-L-phenylalanine	Amino acids and derivatives	Amino acids and derivatives	2577-40-4	B	2620	3500	1740	11300	8360	7410	4430	6780	2540	7580	9320	7020	8210	7230	7560	--	--
Lmbn005287	311.22	249.22	312.23	C18H32O4	[M-H]-	7S,8S-DiHODE; (9Z,12Z)-(7S,8S)-Dihydroxyoctadeca-9,12-dienoic acid	Lipids	Free fatty acids	143288-65-7	A	206000	218000	194000	475000	645000	738000	144000	182000	166000	304000	256000	253000	374000	343000	341000	C07354	ko00591
pmb2804	311.1	171.3	312.23	C18H32O4	[M-H]-	13S-Hydroperoxy-9Z,11E-octadecadienoic acid	Lipids	Free fatty acids	33964-75-9	B	26700	33500	19900	41300	46300	60300	11000	22000	16500	18200	26300	23300	30700	30000	27900	C04717	ko00591,ko01100
mws1433	314.14	177.05	313.131	C18H19NO4	[M+H]+	N-Feruloyltyramine	Alkaloids	Phenolamine	66648-43-9	A	576000	834000	319000	1540000	1330000	2040000	1060000	486000	813000	2060000	4480000	1950000	1660000	1520000	1410000	C02717	--
pmn001367	315.07	153.02	316.079	C13H16O9	[M-H]-	Protocatechuic acid-4-O-glucoside	Phenolic acids	Phenolic acids	-	A	673000	775000	571000	508000	569000	355000	738000	747000	544000	649000	794000	498000	681000	665000	586000	--	--
pmb0751	321.1	147.3	320.09	C16H16O7	[M+H]+	Trans-5-O-(p-Coumaroyl)shikimate	Phenolic acids	Phenolic acids	-	B	168000	156000	180000	91100	73300	58700	199000	165000	201000	37900	24700	22700	122000	142000	105000	C02947	ko00940,ko00941,ko00945,ko01100,ko01110
mws0582	322.11	130	321.099	C11H19N3O6S	[M+H]+	S-(Methyl)glutathione	Amino acids and derivatives	Amino acids and derivatives	2922-56-7	A	55400	62300	48500	36500	45100	35800	39900	54800	52700	31300	24400	25800	53100	36700	44100	C11347	--
pme3174	324.06	112	323.052	C9H14N3O8P	[M+H]+	Cytidine 5'-monophosphate(Cytidylic acid)	Nucleotides and derivatives	Nucleotides and derivatives	63-37-6	B	84300	77900	90700	63000	117000	140000	84800	68000	116000	42800	37300	41100	109000	102000	113000	C00055	ko00240,ko01100
pme3188	323.03	211	324.036	C9H13N2O9P	[M-H]-	Uridine 5'-monophosphate	Nucleotides and derivatives	Nucleotides and derivatives	58-97-9	B	664000	670000	657000	391000	962000	856000	639000	362000	792000	314000	280000	230000	606000	652000	497000	C00105	ko00240,ko01100
mws0983	326.31	62.06	325.298	C20H39NO2	[M+H]+	N-Oleoylethanolamine	Alkaloids	Alkaloids	111-58-0	A	3350000	3960000	2740000	8390000	7700000	8370000	2900000	3840000	2910000	5870000	7250000	5810000	5830000	4930000	4350000	C20792	--
Lmhn002140	325.06	193.05	326.064	C14H14O9	[M-H]-	Feruloyltartaric acid (Fertaric acid)	Phenolic acids	Phenolic acids	-	A	9	9	9	9	9	9	9	9	9	2790000	2420000	2720000	772000	712000	686000	--	--
Zmdn001863	325	193	326.078	C18H14O6	[M-H]-	2-(7-Dihydroxyl)-benzofuranyl-ferulic acid	Phenolic acids	Phenolic acids	-	B	9	9	9	9	9	9	9	9	9	3080000	2400000	2840000	759000	757000	643000	--	--
Zmhn002301	325.09	163.04	326.1	C15H18O8	[M-H]-	p-Coumaric acid-4-O-glucoside	Phenolic acids	Phenolic acids	117405-48-8	A	4170000	4370000	3970000	4470000	6010000	4510000	3320000	3410000	4260000	1120000	1770000	1230000	3650000	3580000	3160000	C06739	--
Lmtn002233	327.11	165.05	328.116	C15H20O8	[M-H]-	Androsin	Others	Others	531-28-2	A	67700	65300	70200	97300	133000	150000	41600	32900	29500	61800	79000	55300	84300	66300	68100	--	--
pmn001691	327.22	291.2	328.225	C18H32O5	[M-H]-	9,12,13-Trihydroxy-10,15-octadecadienoic acid	Lipids	Free fatty acids	-	B	37800	37100	38500	64200	136000	94100	34400	22800	45300	5600	2370	6380	48000	42900	38300	--	--
mws0884	328.05	134.2	329.053	C10H12N5O6P	[M-H]-	Cyclic 3',5'-Adenylic acid	Nucleotides and derivatives	Nucleotides and derivatives	60-92-4	A	9220	8190	10200	12900	10400	12700	10300	14300	16500	10100	11300	10600	15700	15300	6990	C00575	ko00230,ko01100
Lmtn002565	329.11	167.03	330.095	C14H18O9	[M-H]-	1-O-Vanilloyl-D-Glucose	Phenolic acids	Phenolic acids	-	A	2270000	2420000	2130000	35400	59600	45400	900000	1280000	1190000	366000	440000	241000	1120000	1030000	1100000	C20470	--
pmn001517	329.12	167	330.131	C15H22O8	[M-H]-	3,4,5-Trimethoxyphenyl-1-O-Glucoside	Phenolic acids	Phenolic acids	-	B	2080000	2290000	1870000	1490000	2050000	1850000	1230000	1320000	1370000	3010000	3320000	3210000	2480000	2290000	2260000	--	--
pmn001694	329.23	229.15	330.241	C18H34O5	[M-H]-	9,10,13-Trihydroxy-11-Octadecenoic Acid	Lipids	Free fatty acids	29907-57-1	A	175000	204000	145000	324000	573000	618000	155000	148000	187000	92600	79100	93300	235000	211000	149000	C14835	ko00591
pmp001284	331.28	313.27	330.277	C19H38O4	[M+H]+	Monopalmitin	Lipids	Glycerol ester	542-44-9	A	22600	25400	19900	27600	26900	31000	25100	28400	26400	33100	42200	38300	37000	36200	29100	--	--
pme3184	332.08	136	331.068	C10H14N5O6P	[M+H]+	2'-Deoxyadenosine-5'-monophosphate	Nucleotides and derivatives	Nucleotides and derivatives	653-63-4	B	130000	112000	148000	122000	91400	109000	90300	98400	112000	85200	89700	74900	138000	116000	110000	C00360	ko00230,ko01100
pmb0789	332.13	152.07	331.127	C14H21NO8	[M+H]+	Pyridoxine-5'-O-glucoside	Others	Vitamin	-	B	123000	101000	144000	90000	64100	83600	58800	90700	109000	24600	41100	30600	86800	75600	78800	C03996	--
pmc0066	333.05	137.05	332.052	C10H13N4O7P	[M+H]+	2'-Deoxyinosine-5'-monophosphate	Nucleotides and derivatives	Nucleotides and derivatives	3393-18-8	B	12900000	11200000	14600000	8170000	7020000	6160000	13000000	10900000	12600000	9550000	7700000	7580000	11500000	9530000	7900000	C06196	ko00230
pmn001518	331.07	169.01	332.074	C13H16O10	[M-H]-	1-O-Galloyl-D-glucose	Tannins	Tannin	58511-73-2	A	363000	399000	328000	244000	339000	293000	211000	230000	225000	469000	528000	493000	376000	353000	359000	C01158	--
mws0675	335.06	123	334.057	C11H15N2O8P	[M+H]+	β-Nicotinamide mononucleotide	Nucleotides and derivatives	Nucleotides and derivatives	1094-61-7	B	87300	91900	82700	133000	188000	167000	77000	62700	82800	90900	110000	83300	107000	143000	99000	C00455	ko00760,ko01100
pmb0776	337.15	177.4	336.147	C20H20N2O3	[M+H]+	N-Feruloyltryptamine	Alkaloids	Phenolamine	53905-13-8	A	31200	51800	10600	10300	8340	12600	31800	38300	19700	9110	11800	15900	25500	19000	19500	--	--
Zmyn000083	338.99	78.96	339.996	C6H14O12P2	[M-H]-	D-Glucose 1,6-bisphosphate	Others	Saccharides and Alcohols	10139-18-1	B	16400	17000	15700	16600	12400	16500	9600	13400	13500	17100	17600	12300	10500	18100	13500	C01231	ko00500,ko01100
pme3311	339	97	339.996	C6H14O12P2	[M-H]-	D-Fructose-1,6-biphosphate	Others	Saccharides and Alcohols	488-69-7	B	34000	34600	33400	30600	29500	24900	37200	31900	32800	29300	33100	25100	37900	30100	30800	C00354	ko00400,ko00710,ko01100,ko01110,ko01200
mws1015	339.07	177	340.079	C15H16O9	[M-H]-	Esculin (6,7-DihydroxyCoumarin-6-glucoside)*	Lignans and Coumarins	Coumarins	531-75-9	B	52700	60400	45000	74500	122000	80800	53500	38300	54100	34400	31500	30100	59500	63200	46200	C09264	--
pmn001420	341.09	179.04	342.095	C15H18O9	[M-H]-	1-O-[(E)-Caffeoyl]-D-glucose	Phenolic acids	Phenolic acids	-	A	3020000	3050000	2980000	5270000	7220000	5910000	2150000	2090000	2560000	1150000	2050000	1660000	3610000	3170000	3200000	--	--
mws1333	341.11	113	342.116	C12H22O11	[M-H]-	Melibiose*	Others	Saccharides and Alcohols	585-99-9	A	616000	696000	536000	555000	579000	439000	912000	536000	741000	1430000	1720000	1310000	977000	518000	917000	C05402	ko00052,ko01100,ko02010
mws5038	341.11	89.02	342.116	C12H22O11	[M-H]-	Isomaltulose*	Others	Saccharides and Alcohols	13718-94-0	A	1330000	1560000	1100000	710000	1340000	899000	1330000	1550000	2080000	3870000	3760000	2920000	1920000	1060000	1580000	C01742	--
MA10039641	341.11	89.02	342.116	C12H22O11	[M-H]-	Lactobiose*	Others	Saccharides and Alcohols	63-42-3	A	2470000	2410000	2530000	1650000	1900000	1650000	2570000	2210000	1990000	3840000	4920000	4430000	2410000	2340000	2610000	C00243	ko00052,ko01100,ko02010
mws0264	341.11	119	342.116	C12H22O11	[M-H]-	D-(+)-Trehalose*	Others	Saccharides and Alcohols	99-20-7	A	1200000	1280000	1130000	780000	1160000	740000	1080000	1090000	1070000	2350000	2330000	2140000	1210000	1210000	1070000	C01083	ko00500,ko01100,ko01110,ko02010
mws0906	341.12	179	342.131	C16H22O8	[M-H]-	Coniferin	Phenolic acids	Phenolic acids	531-29-3	B	741000	674000	808000	262000	406000	226000	264000	227000	217000	212000	171000	348000	386000	408000	374000	C00761	ko00940
pmb2211	343.3	240.7	342.288	C19H38N2O3	[M+H]+	Cocamidopropyl betaine	Alkaloids	Alkaloids	4292/10/8	A	17700	26800	8570	16600	32600	9510	8600	26000	10300	14100	10800	20900	83800	66900	58200	--	--
HJAP050	344.15	177.05	343.142	C19H21NO5	[M+H]+	N-Feruloyl-3-methoxytyramine	Alkaloids	Phenolamine	78510-19-7	A	241000	295000	187000	7000	9230	58100	1110000	268000	1560000	171000	290000	251000	440000	413000	345000	--	--
mws0609	344.04	150	345.047	C10H12N5O7P	[M-H]-	Guanosine 3',5'-cyclic monophosphate	Nucleotides and derivatives	Nucleotides and derivatives	7665-99-8	B	258000	172000	343000	216000	623000	292000	327000	233000	411000	140000	169000	151000	291000	315000	253000	C00942	ko00230,ko01100
pmb0801	346.11	184.1	345.106	C14H19NO9	[M+H]+	4-Pyridoxic acid-O-glucoside	Others	Vitamin	-	B	11400	7050	15700	7430	6110	6250	13800	16300	23400	9	9	9	8680	9010	9540	--	--
pmb0981	348.07	136	347.063	C10H14N5O7P	[M+H]+	Adenosine 5'-monophosphate	Nucleotides and derivatives	Nucleotides and derivatives	61-19-8	A	452000	377000	527000	174000	194000	178000	360000	277000	281000	221000	221000	209000	333000	254000	233000	C00020	ko00230,ko00908,ko01100,ko01110
Lmhp011388	353.27	261.22	352.261	C21H36O4	[M+H]+	2-α-Linolenoyl-glycerol*	Lipids	Glycerol ester	55268-58-1	A	447000	402000	493000	459000	548000	495000	279000	386000	388000	988000	1360000	1250000	914000	781000	655000	--	--
Lmhp011562	353.27	261.22	352.261	C21H36O4	[M+H]+	1-α-Linolenoyl-glycerol*	Lipids	Glycerol ester	-	A	795000	786000	804000	1020000	1230000	1070000	595000	711000	844000	1370000	1670000	1830000	1340000	1210000	1100000	--	--
mws1077	355.1	193.05	354.095	C16H18O9	[M+H]+	Scopoletin-7-O-glucoside (Scopolin)	Lignans and Coumarins	Coumarins	531-44-2	B	54700	48800	60700	139000	127000	107000	53200	46500	70000	94800	95100	94600	72800	70200	64200	C01527	ko00940,ko01110
mws0178	353.09	191.01	354.095	C16H18O9	[M-H]-	Chlorogenic acid*	Phenolic acids	Phenolic acids	327-97-9	A	23400	13200	33500	24000	203000	38100	34100	55300	40900	22700	49400	37300	41100	45300	37500	C00852	ko00940,ko00941,ko00945,ko01110
mws2108	353.09	135.1	354.095	C16H18O9	[M-H]-	Cryptochlorogenic acid*	Phenolic acids	Phenolic acids	905-99-7	A	16000	10800	21100	19400	12700	9810	14600	17500	13600	9	9	9	17100	15000	11600	--	--
pme1816	353.09	191	354.095	C16H18O9	[M-H]-	Neochlorogenic acid(5-O-Caffeoylquinic acid)*	Phenolic acids	Phenolic acids	906-33-2	A	5240	9	10500	4000	16600	13300	13500	16600	12800	5020	15300	19400	13300	12100	11800	C17147	--
Lmhp112042	355.28	263.24	354.277	C21H38O4	[M+H]+	1-Linoleoylglycerol*	Lipids	Glycerol ester	2277-28-3	A	696000	690000	702000	914000	891000	957000	582000	624000	696000	1130000	1170000	1290000	1080000	934000	867000	--	--
pmp001283	355.28	337.27	354.277	C21H38O4	[M+H]+	1-Monolinolein	Lipids	Glycerol ester	26545-74-4	A	73100	71100	75000	201000	140000	233000	55100	65400	74600	109000	105000	111000	123000	116000	106000	--	--
Lmhp012042	355.28	263.24	354.277	C21H38O4	[M+H]+	2-Linoleoylglycerol*	Lipids	Glycerol ester	3443-82-1	A	429000	400000	459000	565000	576000	637000	352000	356000	402000	1040000	1190000	1230000	872000	698000	650000	--	--
Zmhn002422	355.1	193.05	356.11	C16H20O9	[M-H]-	1-O-Feruloyl-D-Glucose	Phenolic acids	Phenolic acids	-	A	3540000	3280000	3790000	7430000	7410000	6160000	3500000	2920000	4160000	5470000	5520000	5080000	5010000	4810000	4660000	C17759	--
pmb0296	357.3	265.4	356.293	C21H40O4	[M+H]+	1-Oleoyl-Sn-Glycerol	Lipids	Glycerol ester	129784-87-8	B	118000	117000	119000	418000	386000	400000	86200	110000	87900	159000	194000	135000	242000	217000	183000	--	--
pmb3107	359.1	182.1	360.106	C15H20O10	[M-H]-	Glucosyringic Acid	Phenolic acids	Phenolic acids	-	B	63100	64600	61500	130000	117000	100000	83000	79100	79500	62800	49300	57100	79300	74000	69200	--	--
pmb0998	364.07	152.1	363.058	C10H14N5O8P	[M+H]+	Guanosine 5'-monophosphate	Nucleotides and derivatives	Nucleotides and derivatives	85-32-5	B	23400	23500	23300	12300	7440	10600	19200	16200	11400	8680	12900	5030	22300	16700	10700	C00144	ko00230,ko01100
mws5040	365.11	203.05	364.078	C12H21O11Na	[M+H]+	Turanose	Others	Saccharides and Alcohols	547-25-1	B	811000	726000	897000	675000	830000	746000	1010000	1030000	972000	810000	542000	870000	898000	847000	606000	C19636	--
Lmgp003270	369.16	177.06	368.074	C16H16O10	[M+H]+	Scopoletin-7-O-glucuronide	Lignans and Coumarins	Coumarins	132752-65-9	B	1440	9	2880	24700	11300	9790	7340	4050	6230	19100	15300	23200	6900	8280	8820	--	--
pmn001695	371.1	249.06	372.106	C16H20O10	[M-H]-	Trihydroxycinnamoylquinic acid	Phenolic acids	Phenolic acids	-	B	33800	31800	35700	29700	35000	48900	8640	18300	14300	25200	38900	26000	30600	27300	26100	--	--
mws0011	371.13	209	372.142	C17H24O9	[M-H]-	Syringin	Phenolic acids	Phenolic acids	118-34-3	B	29400	21000	37800	10800	10500	11300	105000	95000	98100	13800	21900	15100	40800	45300	41100	C01533	ko00940
mws0232	377.15	243	376.138	C17H20N4O6	[M+H]+	Riboflavin	Others	Vitamin	83-88-5	A	92600	102000	82700	286000	290000	328000	94300	99500	110000	116000	199000	162000	187000	188000	156000	C00255	ko00740,ko01100,ko01110,ko02010
pme3337	384.12	252	383.108	C14H17N5O8	[M+H]+	Succinyladenosine	Nucleotides and derivatives	Nucleotides and derivatives	4542-23-8	B	397000	467000	328000	539000	643000	627000	278000	192000	275000	226000	251000	285000	440000	386000	374000	--	--
pme1286	385.13	250	384.122	C14H20N6O5S	[M+H]+	S-(5'-Adenosy)-L-homocysteine	Amino acids and derivatives	Amino acids and derivatives	979-92-0	A	97600	114000	81600	169000	182000	153000	121000	117000	103000	69300	91000	70700	140000	127000	114000	C00021	ko00270,ko01100,ko01230
Zmhn002227	385.11	223.06	386.121	C17H22O10	[M-H]-	4-O-Glucosyl-sinapate	Phenolic acids	Phenolic acids	-	B	168000	190000	145000	163000	155000	101000	139000	122000	114000	156000	128000	139000	168000	151000	148000	C02919	--
HJN003	385.11	223.06	386.122	C17H22O10	[M-H]-	1-O-Sinapoyl-D-glucose	Phenolic acids	Phenolic acids	-	A	282000	328000	236000	326000	187000	153000	343000	238000	252000	154000	111000	142000	221000	223000	205000	C01175	ko00940
pmn001556	401.09	119	402.095	C20H18O9	[M-H]-	Cimicifugic acid K	Phenolic acids	Phenolic acids	-	B	21200	24400	18000	66100	69400	88500	16900	31300	25500	9	9	9	34400	32000	34800	--	--
pme3007	402.99	159	404.002	C9H14N2O12P2	[M-H]-	Uridine 5'-diphosphate	Nucleotides and derivatives	Nucleotides and derivatives	27821-45-0	B	22600	21700	23500	25400	29600	26200	20100	19400	28000	18400	13400	17400	22600	22100	22100	C00015	ko00240,ko00908,ko01100
pmn001663	417.16	402.1	418.163	C22H26O8	[M-H]-	Syringaresinol	Lignans and Coumarins	Lignans	21453-69-0	B	4170	5290	3060	1590	2130	1650	8690	6670	5550	10400	2420	1240	4660	5800	4270	C10889	--
mws2523	421.08	241.1	422.083	C12H23O14P	[M-H]-	Trehalose 6-phosphate	Others	Saccharides and Alcohols	4484-88-2	B	143000	145000	140000	70500	80300	101000	174000	133000	88300	193000	178000	125000	121000	112000	113000	C00689	ko00500,ko01100,ko01110
mws1430	425.38	95.09	424.371	C30H48O	[M+H]+	Lupenone	Terpenoids	Triterpene	1617-70-5	B	137000	160000	114000	115000	100000	93600	87800	81500	84500	101000	40100	56600	20700	17100	13200	C16990	--
pmb0864	426.26	285.24	425.254	C19H40NO7P	[M+H]+	LysoPE 14:0*	Lipids	LPE	-	A	144000	147000	141000	213000	271000	215000	119000	99400	110000	201000	231000	239000	216000	191000	175000	--	--
Lmhp008337	426.26	285.24	425.254	C19H40NO7P	[M+H]+	LysoPE 14:0(2n isomer)*	Lipids	LPE	-	A	24800	24800	24900	34300	40400	31300	19400	15400	18800	24600	28500	33300	31600	28000	31200	--	--
mad1424	427.05	295.05	426.043	C17H14O13	[M+H]+	Ditartaroyl-hydroxycoumarin	Lignans and Coumarins	Coumarins	-	B	103000	96100	110000	80800	92000	95000	101000	99900	90400	79900	75700	72800	107000	90800	69600	--	--
pme2117	426	159	427.029	C10H15N5O10P2	[M-H]-	Adenosine 5'-diphosphate	Nucleotides and derivatives	Nucleotides and derivatives	58-64-0	B	300000	301000	300000	334000	348000	324000	238000	260000	285000	270000	180000	291000	298000	317000	244000	C00008	ko00190,ko00195,ko00230,ko00908,ko01100,ko01110
Cmbn007148	429.12	429.12	430.126	C22H22O9	[M-H]-	1-O-Feruloyl-3-O-caffeoylglycerol	Lipids	Glycerol ester	-	B	206000	209000	204000	9	9	9	742000	405000	310000	316000	254000	209000	237000	222000	230000	--	--
Cmzn005251	433.11	271.06	434.121	C21H22O10	[M-H]-	6-O-Caffeoylarbutin	Phenolic acids	Phenolic acids	136172-60-6	B	156000	147000	164000	35400	33400	25500	92000	120000	111000	65400	76800	36200	114000	114000	98200	--	--
HJN055	435.13	273.08	436.136	C21H24O10	[M-H]-	Dihydrocharcone-4'-O-glucoside*	Others	Others	-	A	294000	328000	260000	46200	55500	74100	176000	247000	231000	650000	686000	480000	391000	384000	374000	--	--
Lmhp008885	440.28	299.26	439.27	C20H42NO7P	[M+H]+	LysoPE 15:0(2n isomer)	Lipids	LPE	-	A	36300	33900	38800	83700	91000	70600	32400	27900	38400	66200	72900	88400	67000	61600	63000	--	--
pmb0862	440.28	184.07	439.27	C20H42NO7P	[M+H]+	LysoPC 12:0	Lipids	LPC	20559-18-6	B	3760	4250	3260	4200	4300	3800	2660	2700	2560	10500	10000	10800	9480	10300	8290	--	--
Lmhp009187	440.28	299.26	439.27	C20H42NO7P	[M+H]+	LysoPE 15:0	Lipids	LPE	-	A	118000	114000	123000	297000	355000	275000	88100	83500	115000	277000	313000	332000	244000	215000	199000	--	--
pme1014	445.3	341.3	444.303	C31H40O2	[M+H]+	Menatetrenone (Vitamin K2)	Others	Vitamin	11032-49-8	B	63500	59700	67200	53100	44500	50300	52600	52400	56500	46300	44500	40900	904000	1220000	1720000	--	--
pmb1283	448.1	163.5	447.215	C18H33N5O6S	[M+H]+	L-Glutaminyl-L-valyl-L-valyl-L-cysteine	Amino acids and derivatives	Amino acids and derivatives	-	B	76200	80200	72200	9	9	58300	89700	105000	78200	21700	24600	26600	51300	52700	50200	--	--
Lmhp009034	452.28	311.26	451.27	C21H42NO7P	[M+H]+	LysoPE 16:1*	Lipids	LPE	-	A	96100	102000	90100	398000	459000	410000	107000	84100	92500	206000	274000	241000	226000	228000	215000	--	--
Lmhp008763	452.28	311.26	451.27	C21H42NO7P	[M+H]+	LysoPE 16:1(2n isomer)*	Lipids	LPE	-	A	10800	7490	14200	50400	68200	58200	12600	13400	12600	38700	52100	37300	34400	26800	23600	--	--
pmd0160	454.29	313.27	453.286	C21H44NO7P	[M+H]+	LysoPE 16:0(2n isomer)*	Lipids	LPE	-	A	1270000	1330000	1220000	2930000	3490000	2720000	979000	958000	1320000	1610000	1960000	2130000	2050000	1830000	1820000	--	--
pmb0876	454.29	313.27	453.286	C21H44NO7P	[M+H]+	LysoPE 16:0*	Lipids	LPE	53862-35-4	A	7880000	7720000	8050000	20000000	21100000	19400000	6820000	6240000	8530000	13300000	16000000	18200000	14200000	13200000	12000000	--	--
pmn001700	455.35	455.35	456.36	C30H48O3	[M-H]-	24,30-Dihydroxy-12(13)-enolupinol	Terpenoids	Triterpene	-	A	6940	7750	6140	43400	59000	52600	9600	8130	6630	155000	345000	258000	191000	178000	163000	--	--
pmb0464	458.1	116.3	457.143	C16H27NO14	[M+H]+	L-Aspartic acid-O-diglucoside	Amino acids and derivatives	Amino acids and derivatives	-	B	2650000	3290000	2020000	1810000	3350000	3280000	1140000	2500000	2860000	599000	656000	704000	3260000	3150000	2610000	--	--
Lmhn002683	457.08	163.04	458.085	C22H18O11	[M-H]-	p-Coumaroylcaffeoyltartaric acid	Phenolic acids	Phenolic acids	-	B	90600	85600	95600	35400	32900	31300	87300	83100	105000	9	9	9	86800	55800	49800	--	--
pmb2654	460.1	117.9	461.153	C19H27NO12	[M-H]-	Anthranilate-1-O-Sophoroside	Phenolic acids	Phenolic acids	-	B	130000	127000	133000	130000	178000	172000	139000	148000	128000	510000	374000	398000	206000	202000	218000	--	--
Lmhn002321	461.07	167.04	462.08	C21H18O12	[M-H]-	Vnilloylcaffeoyltartaric acid	Phenolic acids	Phenolic acids	-	B	42700	50100	35300	7440	5960	7560	27300	36200	43100	25700	22700	23000	27900	33200	22300	--	--
pmp001307	463.31	353.2	462.298	C27H42O6	[M+H]+	Stachysterone C	Steroids	Steroid	26362-25-4	B	1490000	1290000	1690000	3790000	3700000	3390000	1180000	1470000	1320000	1230000	1130000	1430000	2020000	2000000	1810000	--	--
Lmhp009769	466.29	325.27	465.286	C22H44NO7P	[M+H]+	LysoPE 17:1*	Lipids	LPE	-	A	42100	40300	43900	124000	176000	148000	43900	37300	42900	46000	61100	61000	86800	80000	61400	--	--
Lmhp009464	466.29	325.27	465.286	C22H44NO7P	[M+H]+	LysoPE 17:1(2n isomer)*	Lipids	LPE	-	A	12600	11600	13600	26100	19200	29700	13600	9250	15300	20800	15900	16900	22300	12000	17900	--	--
pmd0130	468.31	184.07	467.301	C22H46NO7P	[M+H]+	LysoPC 14:0	Lipids	LPC	20559-16-4	A	77600	88000	67200	60400	80900	71800	57100	54500	55500	51800	62700	73100	77800	76400	66900	--	--
Hmjn008136	469.33	469.33	470.34	C30H46O4	[M-H]-	Camaldulenic acid	Terpenoids	Triterpene	71850-15-2	B	3200	3270	3130	9	9	9	9	9	9	11300	28900	33800	7330	7550	9670	--	--
Lmzn006169	471.35	471.35	472.355	C30H48O4	[M-H]-	Pomolic acid	Terpenoids	Triterpene	13849-91-7	A	6820	7050	6590	5760	15500	6960	11500	21100	7550	99500	300000	225000	62900	67700	63000	--	--
Lmhp008589	476.28	335.26	475.27	C23H42NO7P	[M+H]+	LysoPE 18:3(2n isomer)*	Lipids	LPE	-	A	1910000	1790000	2020000	2370000	2850000	2910000	2040000	2040000	2710000	1540000	2130000	1910000	2400000	2190000	2030000	--	--
Lmhp008801	476.28	335.26	475.27	C23H42NO7P	[M+H]+	LysoPE 18:3*	Lipids	LPE	-	A	2350000	2200000	2500000	2300000	2790000	2540000	2290000	2170000	3040000	1660000	2710000	2760000	2960000	2550000	2350000	--	--
pmb0881	478.29	337.27	477.286	C23H44NO7P	[M+H]+	LysoPE 18:2*	Lipids	LPE	-	A	3040000	2900000	3190000	5340000	6590000	5770000	3130000	2700000	3180000	4140000	4210000	4980000	4340000	4370000	4050000	--	--
pmb0874	478.29	337.27	477.286	C23H44NO7P	[M+H]+	LysoPE 18:2(2n isomer)*	Lipids	LPE	-	A	264000	275000	252000	531000	608000	628000	262000	258000	333000	484000	584000	568000	434000	380000	398000	--	--
Zmhn004909	477.06	169.01	478.075	C21H18O13	[M-H]-	3,4-Digalloylshikimic acid	Phenolic acids	Phenolic acids	-	B	61000	56200	65800	9	9	9	48300	42400	39700	58900	101000	49200	69600	65100	50000	--	--
Lmnn002886	477.14	179.03	478.148	C23H26O11	[M-H]-	1'-O-(3,4-Dihydroxyphenethyl)-O-caffeoyl-glucoside	Phenolic acids	Phenolic acids	-	B	12200000	10600000	13800000	250000	200000	379000	9170000	8090000	8350000	13600000	16200000	11100000	10200000	10400000	9160000	--	--
mws0289	480.31	339.29	479.301	C23H46NO7P	[M+H]+	LysoPE 18:1	Lipids	LPE	89576-29-4	A	1490000	1500000	1490000	4700000	6000000	4840000	1400000	1140000	1370000	2950000	3420000	3380000	2990000	2840000	2760000	--	--
pmb2260	480.31	184.07	479.301	C23H46NO7P	[M+H]+	LysoPC 15:1	Lipids	LPC	-	B	65500	69700	61300	111000	138000	126000	62200	47900	70700	37400	58600	55300	90800	77500	74600	--	--
pmp001303	481.32	165.1	480.309	C27H44O7	[M+H]+	Inokosterone	Steroids	Steroid	15130-85-5	B	11500000	11100000	11800000	16600000	18200000	17100000	9270000	11100000	10300000	8880000	10300000	10900000	14500000	12400000	12000000	C08819	--
pmb2319	482.32	184.07	481.317	C23H48NO7P	[M+H]+	LysoPC 15:0*	Lipids	LPC	108273-89-8	A	145000	156000	134000	205000	225000	189000	143000	95200	133000	87200	194000	193000	184000	175000	167000	--	--
pmb0883	482.32	341.31	481.317	C23H48NO7P	[M+H]+	LysoPE 18:0	Lipids	LPE	69747-55-3	B	46700	52800	40700	157000	184000	139000	57800	46400	61200	82100	114000	122000	90700	80400	67600	--	--
pmb0880	482.32	341.31	481.317	C23H48NO7P	[M+H]+	LysoPE 18:0(2n isomer)	Lipids	LPE	-	B	17900	16800	19000	56000	69500	58100	15700	15800	15000	34300	33700	36800	37200	31600	33900	--	--
Lmhp009129	482.32	184.07	481.317	C23H48NO7P	[M+H]+	LysoPC 15:0(2n isomer)*	Lipids	LPC	-	A	191000	206000	177000	260000	280000	213000	175000	151000	176000	195000	228000	243000	233000	204000	198000	--	--
Hmlp001270	485.09	153.01	484.086	C20H20O14	[M+H]+	2,3-Di-O-galloyl-D-glucose	Tannins	Tannin	-	B	3540	4580	2490	5370	3610	4860	11300	10700	7510	4730	3090	2500	4200	5840	3820	--	--
Hmyn007168	483.27	255.23	484.278	C22H45O9P	[M-H]-	LysoPG 16:0	Lipids	Glycerol ester	-	B	78400	93100	63700	61800	146000	164000	84200	48000	44900	55100	52400	63800	5200	8820	7810	--	--
Lmhn002895	487.09	193.06	488.095	C23H20O12	[M-H]-	Feruloylcaffeoyltartaric acid	Phenolic acids	Phenolic acids	-	B	12900	9910	15900	16900	18300	16300	24000	15400	17800	4280	9	9	15100	13400	11400	--	--
pma1303	492.31	184.07	491.301	C24H46NO7P	[M+H]+	LysoPC 16:2	Lipids	LPC	-	B	158000	172000	143000	166000	229000	180000	185000	158000	198000	214000	249000	255000	237000	209000	179000	--	--
pmb0863	492.31	184.07	491.301	C24H46NO7P	[M+H]+	LysoPC 16:2(2n isomer)	Lipids	LPC	-	A	52000	48400	55500	41800	53800	41200	75100	64700	88400	123000	111000	128000	109000	80200	61000	--	--
Lmhp008833	494.32	184.07	493.317	C24H48NO7P	[M+H]+	LysoPC 16:1(2n isomer)*	Lipids	LPC	-	A	75800	70700	81000	179000	335000	258000	114000	90800	71000	233000	310000	251000	191000	183000	178000	--	--
pmp001270	494.32	184.07	493.317	C24H48NO7P	[M+H]+	LysoPC 16:1*	Lipids	LPC	76790-27-7	A	565000	611000	519000	1530000	2260000	1640000	589000	604000	441000	854000	1150000	1030000	994000	943000	922000	--	--
mws0531	493.11	294.8	494.121	C26H22O10	[M-H]-	Salvianolic acid A	Phenolic acids	Phenolic acids	96574-01-5	B	449000	348000	550000	9	14200	9	9	9	9	2770000	2170000	2540000	1090000	1050000	1130000	C10492	--
pmd0132	496.34	184.07	495.332	C24H50NO7P	[M+H]+	LysoPC 16:0(2n isomer)	Lipids	LPC	-	A	3250000	3460000	3040000	4920000	5260000	4870000	2690000	2550000	3270000	2740000	2830000	3720000	3830000	3830000	3630000	--	--
pmb0855	496.34	184.07	495.332	C24H50NO7P	[M+H]+	LysoPC 16:0	Lipids	LPC	17364-16-8	A	5640000	5720000	5560000	10500000	11700000	9220000	4870000	4520000	6140000	6800000	8270000	9060000	7730000	7720000	7250000	--	--
pmp001305	497.31	351.2	496.304	C27H44O8	[M+H]+	Podecdysone C	Steroids	Steroid	19458-46-9	B	323000	314000	332000	1630000	1840000	1640000	264000	336000	280000	314000	395000	503000	667000	628000	544000	C16500	--
Lmhp009349	502.29	361.27	501.286	C25H44NO7P	[M+H]+	LysoPE 20:4(2n isomer)	Lipids	LPE	-	B	2850	2830	2870	4460	4540	4890	1820	1910	3730	4020	3870	4350	3520	4780	2930	--	--
pmn001407	503.34	279.2	504.345	C30H48O6	[M-H]-	Platycogenic acid C	Terpenoids	Triterpene	26121-81-3	A	494000	506000	482000	926000	1540000	1390000	423000	367000	475000	268000	392000	400000	673000	698000	763000	--	--
pmp001141	506.2	145	505.195	C25H31NO10	[M+H]+	Cimicifugamide	Alkaloids	Phenolamine	-	A	62700	52400	72900	15000	6140	45300	129000	73900	112000	423000	382000	573000	133000	132000	157000	--	--
Lmhp010757	506.32	365.31	505.317	C25H48NO7P	[M+H]+	LysoPE 20:2	Lipids	LPE	-	A	23800	25700	21900	78400	106000	91000	19900	18800	26500	56900	51700	64900	54400	45700	43600	--	--
Lmhp008718	506.32	184.07	505.317	C25H48NO7P	[M+H]+	LysoPC 17:2	Lipids	LPC	-	A	61600	59700	63400	74300	93600	85400	59700	58900	91300	84800	96000	107000	76000	85200	73300	--	--
Lmhp009590	508.34	184.07	507.332	C25H50NO7P	[M+H]+	LysoPC 17:1	Lipids	LPC	-	B	202000	201000	204000	275000	391000	344000	209000	179000	203000	229000	300000	296000	265000	252000	215000	--	--
pmb2406	510.36	184.07	509.348	C25H52NO7P	[M+H]+	LysoPC 17:0*	Lipids	LPC	50930-23-9	A	2840000	2940000	2740000	3530000	3460000	3030000	3480000	2000000	2390000	2420000	2920000	2660000	3070000	2930000	2740000	--	--
Lmhp010515	510.36	184.07	509.348	C25H52NO7P	[M+H]+	LysoPC 17:0(2n isomer)*	Lipids	LPC	-	A	668000	693000	642000	721000	657000	589000	842000	583000	626000	646000	636000	681000	702000	642000	649000	--	--
Lmhp009773	515.32	261.22	514.314	C27H46O9	[M+H]+	1-α-Linolenoyl-glycerol-3-O-glucoside*	Lipids	Glycerol ester	-	A	21400	19200	23600	59900	62600	61200	14300	15000	23000	12900	18000	15600	26000	28100	42300	--	--
Lmhp009526	515.32	261.22	514.314	C27H46O9	[M+H]+	2-α-Linolenoyl-glycerol-1-O-glucoside*	Lipids	Glycerol ester	-	B	22000	19600	24400	66400	85900	67000	14500	20300	22700	12600	17800	19100	41300	26100	34100	--	--
Li512115	515.12	353.09	516.127	C25H24O12	[M-H]-	Isochlorogenic acid B	Phenolic acids	Phenolic acids	14534-61-3	B	24200	26700	21800	26700	41800	24000	24500	25900	22800	15200	11500	16600	22500	17200	16000	C10468	--
pmb0865	518.32	184.07	517.317	C26H48NO7P	[M+H]+	LysoPC 18:3(2n isomer)	Lipids	LPC	-	A	19800000	19800000	19800000	13700000	16900000	15300000	18900000	18300000	24400000	11600000	17900000	17500000	19700000	18500000	17200000	--	--
pmb0854	518.32	184.07	517.317	C26H48NO7P	[M+H]+	LysoPC 18:3	Lipids	LPC	-	A	19000000	19300000	18700000	13300000	16200000	14600000	18200000	17500000	22400000	10900000	17300000	16400000	19200000	17500000	17000000	--	--
Hmbn002692	517.16	175.04	518.164	C22H30O14	[M-H]-	6'-O-Feruloyl-D-sucrose*	Phenolic acids	Phenolic acids	118230-77-6	B	11400	11700	11000	32300	22100	26000	19700	14500	18100	203000	102000	114000	67200	74000	69200	--	--
pmn001458	517.16	175	518.164	C22H30O14	[M-H]-	Sibiricose A5*	Phenolic acids	Phenolic acids	107912-97-0	B	16100	14700	17600	195000	207000	159000	31300	25500	18400	62300	179000	104000	115000	86100	94500	--	--
pmp001273	520.34	184.07	519.332	C26H50NO7P	[M+H]+	LysoPC 18:2	Lipids	LPC	-	A	12600000	12500000	12700000	12000000	13500000	12100000	12500000	11200000	13200000	11600000	12500000	14300000	13900000	12300000	12700000	--	--
pmp001251	520.34	184.07	519.332	C26H50NO7P	[M+H]+	LysoPC 18:2(2n isomer)	Lipids	LPC	-	A	679000	621000	736000	745000	889000	835000	750000	697000	868000	1210000	1130000	1190000	878000	872000	846000	--	--
pmn001378	519.19	357.14	520.194	C26H32O11	[M-H]-	Pinoresinol-4-O-glucoside	Lignans and Coumarins	Lignans	41607-20-9	B	25600	15400	35900	24600	9560	13800	9010	13200	12100	3820	15400	12700	33700	34500	34900	C17529	--
pmp001281	522.36	184.07	521.348	C26H52NO7P	[M+H]+	LysoPC 18:1	Lipids	LPC	-	A	2470000	2390000	2560000	3890000	5120000	4080000	2680000	2100000	2070000	3570000	3550000	3780000	3330000	3180000	3220000	--	--
Lmhp010190	522.36	184.07	521.348	C26H52NO7P	[M+H]+	LysoPC 18:1(2n isomer)	Lipids	LPC	-	A	5460000	5170000	5750000	11500000	16000000	13000000	6220000	4940000	5550000	14100000	13800000	12800000	10300000	9190000	8620000	--	--
mws0126	524.37	184.07	523.364	C26H54NO7P	[M+H]+	LysoPC 18:0	Lipids	LPC	19420-57-6	A	664000	671000	657000	1270000	1750000	1240000	756000	762000	1040000	708000	816000	885000	989000	1010000	884000	--	--
pmd0136	524.37	184.07	523.364	C26H54NO7P	[M+H]+	LysoPC 18:0(2n isomer)	Lipids	LPC	-	A	326000	326000	326000	495000	522000	434000	311000	209000	275000	143000	248000	229000	346000	376000	352000	--	--
Lmhn003801	531.12	337.06	532.122	C25H24O13	[M-H]-	Feruloylsinapoyltartaric acid	Phenolic acids	Phenolic acids	-	B	7360	159	14600	6200	5610	173	18100	14500	9480	17300	10800	11600	8850	10700	10000	--	--
Lmhp007598	534.36	184.07	533.348	C27H52NO7P	[M+H]+	LysoPC 19:2(2n isomer)	Lipids	LPC	-	B	31700	32900	30600	27100	29100	46800	17000	24500	27600	41900	48200	46700	68400	43000	71600	--	--
Lmhp010908	536.37	184.07	535.364	C27H54NO7P	[M+H]+	LysoPC 19:1	Lipids	LPC	-	A	4330000	4440000	4220000	3040000	3370000	2810000	5580000	3750000	4010000	3360000	3370000	3620000	3610000	3770000	3770000	--	--
Zmfn000481	535.04	323.03	536.044	C14H22N2O16P2	[M-H]-	Uridine-5'-Diphosphate-D-Xylose	Nucleotides and derivatives	Nucleotides and derivatives	3616/6/6	B	803000	723000	883000	1410000	1330000	1340000	791000	854000	940000	586000	505000	572000	1040000	960000	856000	C00190	ko00520,ko00908,ko01100
pmb0824	537.1	177.4	536.153	C25H28O13	[M+H]+	Syringic acid-4-O-(6''-feruloyl)glucoside	Phenolic acids	Phenolic acids	-	B	5780	5780	5780	58100	61300	59200	6010	6200	10100	9	9610	2530	22000	16800	16200	--	--
pmb2228	538.39	184.07	537.379	C27H56NO7P	[M+H]+	LysoPC 19:0	Lipids	LPC	108273-88-7	B	13600	13300	13900	14500	20300	14900	12000	14400	13000	29200	40700	37400	36500	33700	35100	--	--
pmp001274	542.32	483.25	541.317	C28H48NO7P	[M+H]+	2-Hydroxy-5,8,11,14,17-icosapentaenoyloxy]propyl-2-(trimethylammonio)ethyl phosphate	Alkaloids	Alkaloids	-	A	8950000	8930000	8980000	9070000	8390000	8560000	8840000	7440000	8740000	8680000	9530000	9150000	10100000	8990000	8660000	--	--
pmb3059	543.1	191.2	544.128	C19H28O18	[M-H]-	Quinic acid O-di-glucuronic acid	Organic acids	Organic acids	-	B	3620	3510	3730	4540	4960	6810	2200	3880	2720	3670	4140	3080	4730	3720	5180	--	--
Lmhp009890	546.36	184.07	545.348	C28H52NO7P	[M+H]+	LysoPC 20:3	Lipids	LPC	1199257-41-4	B	17400	16400	18500	10400	19600	20700	22000	16500	24300	15000	12600	13700	19400	17100	19300	--	--
pmd0147	548.37	184.07	547.364	C28H54NO7P	[M+H]+	LysoPC 20:2	Lipids	LPC	-	B	342000	352000	332000	660000	807000	772000	295000	288000	306000	421000	617000	635000	509000	530000	487000	--	--
Lmhp011549	550.39	184.07	549.379	C28H56NO7P	[M+H]+	LysoPC 20:1	Lipids	LPC	-	A	163000	155000	171000	235000	341000	291000	150000	134000	158000	157000	217000	270000	213000	194000	204000	--	--
mws1138	551.15	303.04	550.143	C24H26N2O13	[M+H]+	Betanin (Betanidin-5-O-glucoside)	Alkaloids	Alkaloids	7659-95-2	B	201000	227000	175000	12800	2830	10700	292000	237000	216000	292000	329000	219000	180000	164000	186000	C08540	ko00965,ko01110
Lmmn002260	551.21	389.17	552.221	C27H36O12	[M-H]-	5'-Methoxyisolariciresinol-9'-O-glucoside	Lignans and Coumarins	Lignans	-	B	21100	21200	21000	43800	26000	38800	25100	33900	33300	50800	48400	64000	35800	33800	34100	--	--
Hmyn007087	555.29	225	556.299	C25H49O11P	[M-H]-	LysoPI 16:0	Lipids	Glycerol ester	-	B	11.9	12.7	11.1	11.1	11.6	11.1	8.87	450	12.2	287	22.1	17.7	11.1	23.8	11.1	--	--
pmp000273	563.15	139.04	562.148	C30H26O11	[M+H]+	Gambiriin B3	Tannins	Tannin	76236-90-3	B	18400	24000	12800	9	9	9	13000	15600	16200	9	9	9	14900	15900	9930	C17777	--
Rfmb25702	561.2	357.13	562.205	C28H34O12	[M-H]-	Pinoresinol-4-O-(6''-acetyl)glucoside	Lignans and Coumarins	Lignans	-	B	23000	22800	23300	41000	23300	29600	20300	19900	28700	6520	9220	5320	23400	18300	16700	--	--
pmb2922	565.05	323.1	566.055	C15H24N2O17P2	[M-H]-	Uridine 5'-diphospho-D-glucose	Nucleotides and derivatives	Nucleotides and derivatives	133-89-1	A	4550000	4250000	4860000	5150000	5480000	5730000	3250000	4600000	4160000	2960000	2250000	2370000	4530000	4360000	3930000	C00029	ko00040,ko00052,ko00053,ko00240,ko00500,ko00520,ko00561,ko00908,ko01100,ko01110
pme0436	577.14	407.1	578.142	C30H26O12	[M-H]-	Procyanidin B3	Tannins	Proanthocyanidins	23567-23-9	A	18100000	23100000	13100000	9	9	9	15900000	19700000	15900000	9	9	9	13000000	13500000	11700000	--	--
pmn001667	577.14	407.1	578.142	C30H26O12	[M-H]-	Procyanidin B4	Tannins	Proanthocyanidins	29106-51-2	A	1950000	2700000	1200000	9	9	9	769000	1290000	1360000	9	9	9	1260000	1430000	1210000	C10238	--
mws0836	577.14	425.1	578.142	C30H26O12	[M-H]-	Procyanidin B1	Tannins	Proanthocyanidins	20315-25-7	A	49300	65200	33400	9	9	9	36500	47300	32200	9	9	9	34000	32100	26100	--	--
pme0434	577.14	407.1	578.142	C30H26O12	[M-H]-	Procyanidin B2	Tannins	Proanthocyanidins	29106-49-8	A	17300000	23100000	11500000	9	9	9	15500000	19300000	16700000	9	9	9	13300000	12700000	11100000	C17639	--
Lmcn003163	579.08	289.07	580.085	C28H20O14	[M-H]-	Epitheaflavic acid-3-O-Gallate	Tannins	Tannin	34218-97-8	B	7040000	8430000	5650000	9	9	9	6970000	8390000	7920000	9	9	9	3680000	2890000	2600000	--	--
Lmqn001932	579.21	417.16	580.216	C28H36O13	[M-H]-	Syringaresinol-4'-O-glucoside	Lignans and Coumarins	Lignans	7374-79-0	B	30300	19400	41300	115000	51900	74200	32100	22200	41900	14900	20300	23500	45300	34700	47600	C10890	--
pmb0492	584.28	325	583.268	C34H37N3O6	[M+H]+	N',N'',N'''-p-Coumaroyl-cinnamoyl-caffeoyl spermidine	Alkaloids	Phenolamine	-	B	33800	37600	30100	67200	76000	61400	41200	38300	43200	25700	27400	32200	40200	45400	51000	--	--
Lmqn000780	606.08	384.98	607.082	C17H27N3O17P2	[M-H]-	Uridine 5'-diphospho-N-acetylglucosamine	Alkaloids	Alkaloids	528-04-1	B	226000	217000	234000	256000	195000	238000	148000	207000	193000	118000	121000	121000	213000	222000	190000	C00043	ko00520,ko01100,ko01502
Zmhn002032	609.18	447.13	610.189	C28H34O15	[M-H]-	4-O-(6'-O-Glucosylcaffeoylglucosyl)-4-hydroxybenzyl alcohol	Phenolic acids	Phenolic acids	-	B	370000	233000	507000	588000	462000	480000	135000	160000	133000	9	9	9	276000	259000	229000	--	--
mws4134	611.14	306.08	612.152	C20H32N6O12S2	[M-H]-	Oxiglutatione	Amino acids and derivatives	Amino acids and derivatives	27025-41-8	A	317000	330000	303000	687000	556000	644000	356000	451000	457000	136000	149000	204000	410000	382000	345000	C00127	ko00480,ko01100
pmn001506	617.41	455.4	618.413	C36H58O8	[M-H]-	Oleanolic acid-3-O-glucoside	Terpenoids	Triterpene Saponin	3391-80-8	B	9	9	9	9	9	9	9	9	9	18600	61500	49000	10800	10400	12300	--	--
Rfmb26201	621.22	417.16	622.226	C30H38O14	[M-H]-	Syringaresinol-4'-O-(6''-acetyl)glucoside	Lignans and Coumarins	Lignans	-	B	288000	277000	300000	328000	217000	251000	417000	371000	364000	139000	134000	138000	308000	269000	258000	--	--
pmb2653	649.1	145	650.227	C24H42O20	[M-H]-	D(+)-Melezitose O-rhamnoside	Others	Saccharides and Alcohols	-	B	18800	21000	16700	34700	38700	42900	24600	20200	19300	57400	20400	35600	32500	36300	32600	--	--
pmb0530	664.12	136.2	663.109	C21H27N7O14P2	[M+H]+	Nicotinic acid adenine dinucleotide	Nucleotides and derivatives	Nucleotides and derivatives	53-84-9	B	326000	325000	327000	505000	600000	552000	231000	275000	364000	379000	315000	340000	490000	400000	365000	C00003	ko00190,ko00730,ko00760,ko01100
pmp001275	672.42	331.29	671.409	C31H61O14N	[M+H]+	3-Hydroxypropyl palmitate glc-glucosamine	Alkaloids	Alkaloids	-	A	249000	264000	234000	762000	727000	657000	265000	184000	268000	76600	121000	88200	324000	292000	386000	--	--
pmp001276	677.37	677.37	676.367	C33H56O14	[M+H]+	1-Linolenoyl-rac-glycerol-diglucoside	Lipids	Free fatty acids	-	A	510000	558000	461000	1430000	1430000	1660000	465000	441000	602000	186000	322000	292000	747000	663000	643000	--	--
Lmhp008744	677.37	261.22	676.367	C33H56O14	[M+H]+	1-α-Linolenoyl-glycerol-2,3-di-O-glucoside*	Lipids	Glycerol ester	-	A	16200	20400	12000	49900	42500	38300	11300	12900	18600	3970	9180	15300	28700	22400	18900	--	--
Lmhp008513	677.37	261.22	676.367	C33H56O14	[M+H]+	2-α-Linolenoyl-glycerol-1,3-di-O-glucoside*	Lipids	Glycerol ester	-	A	32700	32500	32800	115000	81800	102000	24000	24600	44400	9090	22200	20000	54500	58500	28400	--	--
Lmhp009384	679.39	263.24	678.383	C33H58O14	[M+H]+	1-Linoleoylglycerol-2,3-di-O-glucoside*	Lipids	Glycerol ester	-	A	26400	28300	24400	55700	40600	48900	35700	29100	25500	11400	20100	18400	31600	29800	43000	--	--
Lmhp009190	679.39	263.24	678.383	C33H58O14	[M+H]+	2-Linoleoylglycerol-1,3-di-O-glucoside*	Lipids	Glycerol ester	-	A	35500	37600	33300	100000	81000	108000	33700	41300	36500	30800	45700	59100	58700	72400	57200	--	--
pmp001271	679.39	263.24	678.383	C33H58O14	[M+H]+	1-Linoleoyl-sn-glycerol-diglucoside*	Lipids	Free fatty acids	-	A	29200	36300	22100	58200	57700	53000	21200	23000	21500	15900	19300	14500	44100	32000	25300	--	--
Lmmn004145	675.41	397.14	679.419	C38H60O10	[M-H]-	3-O-(2-O-Acetyl-glucosyl)oleanolic acid	Terpenoids	Triterpene	-	A	994000	982000	1010000	2690000	2470000	2790000	806000	646000	946000	367000	864000	688000	1280000	1270000	1270000	--	--
pmn001370	681.24	519.19	682.247	C32H42O16	[M-H]-	Pinoresinol-4,4'-O-di-O-glucoside	Lignans and Coumarins	Lignans	63902-38-5	B	12900	14600	11100	25400	32300	22000	5530	5200	8480	17600	33000	21400	19300	13900	11300	--	--
pmn001368	699.25	537.2	700.258	C32H44O17	[M-H]-	Olivil-4,4'-Di-O-glucoside	Lignans and Coumarins	Lignans	-	B	6370	5920	6810	15100	20300	16900	5100	8030	7610	20500	35300	23000	14200	16700	14900	--	--
pme2651	742.1	620.1	743.075	C21H28N7O17P3	[M-H]-	NADP (Nicotinamide adenine dinucleotide phosphate)	Nucleotides and derivatives	Nucleotides and derivatives	53-59-8	B	152000	147000	156000	173000	142000	172000	128000	139000	158000	158000	147000	162000	153000	145000	130000	C00006	ko00195,ko00480,ko00760,ko01100
pmn001505	763.43	763.4	764.435	C41H64O13	[M-H]-	Oleanolic acid-3-O-xylosyl(1→3)glucuronide	Terpenoids	Triterpene Saponin	-	B	108000	99800	117000	75100	20500	120000	190000	253000	155000	29400	45300	48800	96500	105000	121000	--	--
Hmmp006067	798.5	439.36	780.467	C42H68O13	[M+NH4]+	Oleanolic acid-3-O-glucosyl(1→2)glucoside*	Terpenoids	Triterpene Saponin	-	B	9	9	9	9	9	9	9	9	9	26600	36100	29800	7630	8310	8590	--	--
pmn001648	863.18	411.1	864.19	C45H36O18	[M-H]-	Cinnamtannin D1	Tannins	Tannin	97233-06-2	B	64200	90300	38000	9	9	9	45400	77700	67000	9	9	9	33200	37900	35400	C17632	--
pmn001646	865.2	577.1	866.206	C45H38O18	[M-H]-	Procyanidin C1	Tannins	Proanthocyanidins	37064-30-5	A	1590000	2090000	1100000	9	9	9	1270000	1720000	1410000	9	9	9	1260000	1180000	1120000	C17624	--
pmp000100	867.21	715.16	866.206	C45H38O18	[M+H]+	Arecatannin B1	Tannins	Tannin	79763-28-3	B	33100	52800	13400	9	9	9	17600	25100	17700	9	9	9	43300	41300	37800	C17892	--
Hmmp004534	946.54	455.35	928.504	C47H76O18	[M+NH4]+	Hederagenin-3-O-glucosyl(1-2)glucosyl(1-4)arabinoside	Terpenoids	Triterpene Saponin	149475-29-6	B	1760	2210	1300	1120	4470	1480	2200	4360	1820	1500000	1480000	1100000	644000	921000	928000	--	--
Lmmn005092	955.46	955.46	956.462	C47H72O20	[M-H]-	Medicagenic acid-3-O-glucuronide-28-O-rhamnosyl(1,2)-arabinoside	Terpenoids	Triterpene Saponin	-	B	217000	187000	246000	32300	25500	13500	479000	334000	251000	2540000	2300000	2320000	1110000	992000	1320000	--	--
Lmmn004491	987.49	987.49	988.488	C48H76O21	[M-H]-	Medicagenic acid-3-O-glucosyl-(1,6)-glucosyl-(1,3)-glucoside	Terpenoids	Triterpene Saponin	37838-43-0	B	164000	149000	179000	65800	43100	31300	307000	192000	192000	227000	134000	194000	149000	124000	144000	C08959	--
pmn001650	1153.26	575.1	1154.27	C60H50O24	[M-H]-	Cinnamtannin B2	Tannins	Tannin	88038-12-4	A	17500	27000	8000	9	9	9	9410	7350	10300	9	9	9	13600	11300	14900	C17629	--
