# Supplementary material for: Transcriptome and Metabolome Combined to Analyze Quinoa Grain Quality Differences of Different Colors Cultivars
Source: Int J Mol Sci. 2022 Oct 25;23(21):12883. doi: 10.3390/ijms232112883 (PMC9656266; doi:10.3390/ijms232112883)
Supplement: Supplementary file 1 [file ijms-23-12883-s001.zip › Table S2.xlsx]

## Sheet: Sheet1
Table S2 Analysis of phenolic acid-related metabolites in quinoa seeds of different cultivars
Differential phenolic acid	Log2FC
	BvsR	BvsW	BvsY	RvsY	WvsR	WvsY
3,4-Digalloylshikimic acid	-	−12.73	-	-	12.24	12.92
p-Coumaric acid-4-O-glucoside	-	-	−1.6	−1.42	-	−1.86
4-O-（6'-O-Glucosylcaffeoylglucosyl）-4-hydroxybenzyl alcohol	−1.37	-	−15.33	−13.95	−1.84	−15.79
1-O-Salicyl-D-glucose	-	1.34	−1.53	−1.2	−1.67	−2.87
4-O-Glucosyl-4-hydroxybenzoic acid	-	1.7	-	-	−1.52	−1.52
2-（7-Dihydroxyl）-benzofuranyl-ferulic acid	-	-	18.23	18.23	-	18.23
Trihydroxycinnamoylquinic acid	−1.3	-	-	1.13	−1.46	-
Cimicifugic acid K	-	1.82	−11.2	−11.41	−1.6	−13.02
3,4,5-Trimethoxyphenyl-1-O-Glucoside	-	-	-	1.28	-	-
Sibiricose A5	-	3.53	2.83	2.2	−2.9	-
1-O-[（E）-Caffeoyl]-D-glucose	-	1.02	-	-	−1.44	−1.92
Sinapinaldehyde	-	−1.84	-	-	1.33	1.93
2-（Formylamino）benzoic acid	-	−1.05	−2.41	−2.14	-	−1.36
p-Coumaric acid	-	−1.37	−2.55	−2.59	1.41	−1.18
Glucosyringic Acid	-	-	-	-	-	−1.04
4-Methoxycinnamic acid	-	-	−4.48	−5.25	-	−4.31
Anthranilate-1-O-Sophoroside	-	-	1.72	1.63	-	1.42
3,4-Dimethoxycinnamic acid	-	-	−3.2	−2.77	-	−3.38
Syringic acid-4-O-（6''-feruloyl）glucoside	-	3.36	-	-	−3	-
Trans-5-O-（p-Coumaroyl）shikimate	-	−1.18	−2.56	−2.73	1.34	−1.39
Caffeic aldehyde	-	-	−10.1	−10.11	-	−9.49
Benzamide	-	-	−1.45	−1.15	-	−1.99
Tyrosol	−2.61	−14.89	−14.89	−12.28	12.28	-
2-Amino-3-methoxybenzoic acid	-	-	1.24	1.54	-	1
Cinnamic acid	−1.12	−1.57	−3.66	−2.53	-	−2.09
Caffeic acid	-	-	-	1.24	-	-
Cryptochlorogenic acid	-	-	−10.79	−10.73	-	−10.6
Salicin	-	-	-	-	−1.05	-
4'-Hydroxy-3'-methoxyacetophenone （Acetovanillone）	−9.56	1.65	-	9.98	−11.21	−1.23
Syringaldehyde; 4-Hydroxy-3,5-Dimethoxybenzaldehyde	-	−1.42	-	-	-	-
Benzyl glucoside	-	-	-	-	−1.41	-
Anthranilic Acid	-	1.15	−1.23	-	−1.91	−2.38
p-Coumaraldehyde	−16.19	−16.19	−16.19	-	-	-
Coniferin	−1.65	−1.31	−1.6	-	-	-
4-Hydroxybenzaldehyde	−1.17	-	−1.3	-	-	-
Salvianolic acid A	−15.61	−6.57	2.47	18.08	-	9.04
3,4-Dihydroxybenzoic acid （Protocatechuic acid）	−1.57	−4.07	−4.2	−2.63	-	-
p-Hydroxyphenyl acetic acid	-	1.39	-	-	−1.28	-
2,5-Dihydroxybenzoic acid	−1.58	−3.96	−4.05	−2.48	2.38	-
Vanillic acid	-	1.14	-	-	-	-
Syringic acid	-	1.24	-	-	-	−1.46
Syringin	1.76	−1.44	-	−2.55	3.19	-
4-Aminosalicylic acid	−1.28	−11.24	−11.24	−9.96	9.96	-
2,4-Dinitrophenol	-	-	−1.11	−1.04	-	−1.39
1-O-Vanilloyl-D-Glucose	−1.02	−5.6	−2.7	−1.69	4.59	2.9
1'-O-（3,4-Dihydroxyphenethyl）-O-caffeoyl-glucoside	-	−5.46	-	-	4.95	5.62
Feruloylmalic acid	1.19	-	−2.59	−3.79	-	−3.13
p-Coumaroylmalic acid	-	−1.35	−3.77	−4.4	1.98	−2.42
Feruloylcaffeoyltartaric acid	-	-	-	−3.73	-	-
p-Coumaroylcaffeoyltartaric acid	-	−1.45	−13.3	−13.32	1.47	−11.85
Vnilloylcaffeoyltartaric acid	-	−2.61	-	-	2.35	1.77
Feruloyltartaric acid （Fertaric acid）	-	-	18.16	18.16	-	18.16
Vnilloylmalic acid	-	-	-	-1.31	-	-
Salicylic acid-2-O-glucoside	−2.5	−6.58	−6.82	−4.32	4.08	-
Methyl caffeate	-	−2.11	-	-	2.06	-
3-Hydroxycinnamic Acid	-	-	−2.22	−2.76	-	−2.69
Isochlorogenic acid B	-	-	-	-	-	−1.1
Protocatechuic aldehyde	-	-	1.09	-	-	-
6'-O-Feruloyl-D-sucrose	-	1.24	3.62	3	-	2.38
1-O-Sinapoyl-D-glucose	-	-	−1.06	−1.03	-	-
6-O-Caffeoylarbutin	-	−2.31	−1.39	-	1.78	-
