# Supplementary material for: Transcriptome and Metabolome Combined to Analyze Quinoa Grain Quality Differences of Different Colors Cultivars
Source: Int J Mol Sci. 2022 Oct 25;23(21):12883. doi: 10.3390/ijms232112883 (PMC9656266; doi:10.3390/ijms232112883)
Supplement: Supplementary file 1 [file ijms-23-12883-s001.zip › Table S3.xlsx]

## Sheet: Sheet1
Table S3 Analysis of nucleotides and their derivatives in quinoa seeds of different cultivars
Differential nucleotides and their derivatives	Log2FC
	BvsW	BvsY	RvsY	WvsR	WvsY
Uridine-5'-Diphosphate-D-Xylose	-	-	-	-	−1.29
2'-Deoxyadenosine	-	−1.67	−2.09	-	−1.91
2'-Deoxyuridine	-	-	-	-	−1.17
Succinyladenosine	-	-	-	−1.28	−1.25
Uridine 5'-monophosphate	-	−1.27	−1.12	-	−1.42
Cytidine 5'-monophosphate（Cytidylic acid）	-	−1.06	−1.15	-	−1.4
2'-Deoxyguanosine	-	−1.08	−1.47	-	−1.4
Guanine	-	−1.31	-	-	-
Thymidine	-	-	-	-	−1.31
Xanthine	6.27	-	-	−6.39	−6.12
Uridine 5'-diphospho-D-glucose	-	-	-	-	−1.11
Guanosine 5'-monophosphate	−1.21	−1.4	-	-	-
Adenosine 5'-monophosphate	−1.31	−1.06	-	-	-
N7-Methylguanosine	1.44	1.21	-	−1.17	-
Isoxanthopterin	-	1.39	-	-	1.04
2-Deoxyribose-5'-phosphate	−1.31	−1.77	−1.22	-	-
β-Nicotinamide mononucleotide	-	-	-	−1.13	-
Guanosine 3',5'-cyclic monophosphate	-	-	−1.08	-	-
Thymine	1.17	−1.03	−1.03	-	−2.2
Uridine	1.04	-	-	−1.13	-
