# Supplementary material for: Transcriptome and Metabolome Combined to Analyze Quinoa Grain Quality Differences of Different Colors Cultivars
Source: Int J Mol Sci. 2022 Oct 25;23(21):12883. doi: 10.3390/ijms232112883 (PMC9656266; doi:10.3390/ijms232112883)
Supplement: Supplementary file 1 [file ijms-23-12883-s001.zip › Table S4.xlsx]

## Sheet: Sheet1
Table S4 Difference analysis of lipid related metabolites in quinoa seeds among different cultivars
Difference of lipids	Log2FC
	BvsR	BvsW	BvsY	RvsY	WvsR	WvsY
Ricinoleic acid	-	-	2.85	2.96	-	2.9
12-Oxo-phytodienoic acid	-	-	−1	-	-	−1.59
13S-Hydroxy-9Z,11E,15Z-octadecatrienoic acid	-	-	−1.97	−1.55	-	−2.01
2-Dodecenedioic acid	−1.78	-	−5.37	−3.59	−2.53	−6.12
1-Monolinolein	-	1.39	-	-	−1.56	-
1-Linolenoyl-rac-glycerol-diglucoside	-	1.56	-	-	−1.58	−2.5
1-Linoleoyl-sn-glycerol-diglucoside	-	-	-	-	−1.36	−1.76
LysoPC 16:1	-	1.68	-	-	−1.73	-
9,10,13-Trihydroxy-11-Octadecenoic Acid	-	1.53	-	-	−1.63	−2.52
9,12,13-Trihydroxy-10,15-octadecadienoic acid	-	1.38	−2.98	−2.84	−1.52	−4.36
Eicosadienoic acid	-	-	2.15	2.27	-	1.83
LysoPE 16:0（2n isomer）	-	1.26	-	-	−1.49	-
LysoPC 20:2	-	1.13	-	-	−1.33	-
LysoPC 18:0（2n isomer）	-	-	-	-	-	−1.23
13S-Hydroperoxy-9Z,11E-octadecadienoic acid	-	-	-	-	−1.58	−1.13
12,13-Epoxy-9-Octadecenoic Acid	-	1.12	2.19	2.22	−1.14	1.08
Myristoleic acid	−1.5	-	−9.51	−8.01	-	−9.1
LysoPC 15:1	-	-	-	-	−1.05	−1.31
LysoPC 19:0	-	--	1.4	1.45	-	1.11
LysoPE 18:0	-	1.78	1.18	-	−1.54	-
LysoPE 18:0（2n isomer）	-	1.77	-	1.17	−1.98	-
LysoPE 16:0	-	1.36	1.01	1.14	−1.49	-
LysoPE 18:2（2n isomer）	-	1.16	1.05	-	−1.05	-
LysoPE 14:0	-	-	-	1.03	−1.09	-
LysoPC 16:2（2n isomer）	-	-	1.22	-	-	1.4
LysoPC 12:0	-	-	1.47	1.98	-	1.35
LysoPC 16:0	-	-	-	-	−1.02	-
1-Oleoyl-Sn-Glycerol	-	1.77	-	-	−2.08	−1.3
12-Hydroxydodecanoic acid	-	1.78	−9.29	−8.56	−2.51	−11.07
11-Octadecanoic acid（Vaccenic acid）	-	-	-	1.13	-	-
Elaidic Acid	-	-	1	1.18	-	-
Cis-10-Heptadecenoic Acid	-	-	2.02	2.35	−1.18	1.17
α-Linolenic Acid	-	-	1.12	1.09	-	-
γ-Linolenic Acid	-	-	1.11	1.05	-	-
Palmitoleic Acid	−1.19	-	-	-	-	-
LysoPE 18:1	-	1.79	1.12	1.32	−1.99	-
LysoPC 18:0	-	1.1	-	-	-	-
Choline Alfoscerate	-	-	−1.98	−1.53	-	−1.79
Myristic Acid	−1.15	-	-	1.23	-	1.02
2-Linoleoylglycerol	-	-	1.43	1.64	-	-
1-α-Linolenoyl-glycerol	-	-	1.03	1.18	-	-
2-α-Linolenoyl-glycerol	-	-	1.42	1.77	-	1.26
LysoPE 20:2	-	1.95	1.28	1.41	−2.08	-
LysoPC 18:1（2n isomer）	-	1.31	1.31	1.28	−1.28	-
1-α-Linolenoyl-glycerol-3-O-glucoside	-	1.52	-	-	−1.81	−1.98
LysoPE 17:1	-	1.83	-	-	−1.85	−1.41
2-α-Linolenoyl-glycerol-1-O-glucoside	-	1.73	-	-	−1.93	−2.15
1-Linoleoylglycerol-2,3-di-O-glucoside	-	-	-	-	-	−1.54
2-Linoleoylglycerol-1,3-di-O-glucoside	-	1.44	-	-	−1.37	−1.09
LysoPE 15:0	-	1.38	1.38	1.69	−1.69	-
LysoPE 16:1	-	2.14	1.32	1.35	−2.16	-
LysoPE 15:0（2n isomer）	-	1.17	1.06	1.2	−1.31	-
LysoPC 16:1（2n isomer）	-	1.76	1.8	1.53	−1.48	-
LysoPE 16:1（2n isomer）	-	2.44	1.98	1.73	−2.2	-
1-α-Linolenoyl-glycerol-2,3-di-O-glucoside	-	1.43	-	-	−1.61	−2.2
2-α-Linolenoyl-glycerol-1,3-di-O-glucoside	-	1.61	-	-	−1.68	−2.54
Crepenynic acid	-	-	1.13	1.14	-	-
13-KODE; （9Z,11E）-13-Oxooctadeca-9,11-dienoic acid	-	-	1.7	1.68	-	1.29
7S,8S-DiHODE; （9Z,12Z）-（7S,8S）-Dihydroxyoctadeca-9,12-dienoic acid	-	1.59	-	-	−1.92	−1.19
Methyl 7,10-hexadecadienoate	-	-	-	-	−1.06	−1.29
1-O-Feruloyl-3-O-caffeoylglycerol	1.23	−14.48	-	-	15.72	14.82
