# Supplementary material for: Transcriptome and Metabolome Combined to Analyze Quinoa Grain Quality Differences of Different Colors Cultivars
Source: Int J Mol Sci. 2022 Oct 25;23(21):12883. doi: 10.3390/ijms232112883 (PMC9656266; doi:10.3390/ijms232112883)
Supplement: Supplementary file 1 [file ijms-23-12883-s001.zip › Table S5.xlsx]

## Sheet: Sheet1
Table S5 Difference analysis of metabolites related to organic acids in quinoa seeds among different cultivars
Differential of organic acids	Log2FC
	BvsR	BvsW	BvsY	RvsY	WvsR	WvsY
Isocitric Acid	-	-	−1.06	-	−1.03	−1.89
4,8-Dihydroxyquinoline-2-carboxylic acid	-	1.69	2.31	2.7	−2.08	-
2,3-Dihydroxy-3-Methylbutanoic Acid	-	-	-	-	−1.19	−1.51
Methylenesuccinic acid	-	-	-	-	-	−1.31
2-Hydroxyethylphosphonic acid	-	-	-	1.05	-	-
DL-Glyceraldehyde-3-phosphate	-	-	−1.2	-	-	−1.26
3-Hydroxypropanoic acid	-	-	-	-	-	−1.32
Malonic acid	-	-	−1.63	−1.11	−1.02	−2.13
2-Isopropylmalic Acid	-	2.11	-	-	−1.99	−2.82
1-Aminocyclopropane-1-carboxylic acid	-	-	−1.28	-	-	-
Phosphoenolpyruvate	-	-	−2.22	−1.72	-	−1.89
6-Hydroxyhexanoic acid	-	1.11	-	-	−1.51	−1.81
3-Methyl-2-Oxobutanoic acid	-	-	-	-	-	−1.16
L-Homoserine	-	−1.59	-	-	1.09	-
Fumaric acid	-	-	−1.66	-	-	-
D-Xylonic acid	-	-	−2.1	−1.89	-	−2.26
Citric Acid	-	1.23	-	-	−1.13	−1.73
Quinic Acid	-	-	−1.21	-	−1.27	−2.16
L-（-）-Malic acid	-	-	-	-	−1.1	−1.37
L-Tartaric acid	−1	−3.12	−1.97	-	2.11	1.14
Anchoic Acid	-	-	-	-	-	−1.15
2-Hydroxybutyric Acid	-	-	−10.28	−10.68	-	−10.1
2-Furanoic acid	-	-	1.05	1	1.03	2.04
β-Hydroxyisovaleric acid	-	-	-	−1.24	-	-
Abscisic acid	-	-	−1.05	−1.18	-	−1.44
2-Hydroxy-4-methylpentanoic acid	-	−1.71	-	−1.28	2.01	-
2-Hydroxyhexadecanoic acid	-	1.96	1.49	1.47	−1.94	-
Dimethylmalonic acid	-	-	−1.14	−1.14	-	−1.03
2-Propylglutaric acid	-	-	-	-	−1.03	-
9-Oxononanoic acid	-	-	-	-	-	−1.26
3-Hydroxybenzoic Acid	-	1.55	-	-	−1.55	−1.85
3-Isopropylmalic Acid	-	2.23	-	-	−2	−2.97
3-Dehydro-L-Threonic Acid	-	-	-	-	-	−1.24
