# Supplementary material for: Transcriptome and Metabolome Combined to Analyze Quinoa Grain Quality Differences of Different Colors Cultivars
Source: Int J Mol Sci. 2022 Oct 25;23(21):12883. doi: 10.3390/ijms232112883 (PMC9656266; doi:10.3390/ijms232112883)
Supplement: Supplementary file 1 [file ijms-23-12883-s001.zip › Table S6.xlsx]

## Sheet: Sheet1
Table S6 Analysis of the differences of alkaloid-related metabolites in quinoa seeds among different cultivars
Differential alkaloid species	Log2FC
	BvsR	BvsW	BvsY	RvsY	WvsR	WvsY
3-Hydroxypropyl palmitate glc-glucosamine	-	1.52	−1.39	−1.33	−1.58	−2.91
Cimicifugamide	-	-	2.87	2.13	2.24	4.37
Putrescine	-	-	14.5	14.5	-	-
Acetylcholine	-	-	−1.22	-	-	−1.75
Indole 3-acetic acid （IAA）	-	-	−1.25	−1.06	-	-
N-Feruloyltryptamine	-	-	-	-1.29	1.52	-
N-Hydroxytryptamine	-	2.1	-	−	−2.09	−2.53
N',N'',N'''-p-Coumaroyl-cinnamoyl-caffeoyl spermidine	-	1.01	-	-	-	−1.26
Dopamine	−1.57	−2.81	−2.29	-	1.24	-
N-Feruloyltyramine	-	1.51	2.3	1.85	−1.06	-
Indole-3-carboxylic acid	-	-	-	1.25	-	1.39
DL-2-Aminoadipic acid	-	-	−1.16	−1.22	-	-
Betanin （Betanidin-5-O-glucoside）	-	−4.52	-	-	4.82	5
N-Oleoylethanolamine	-	1.28	-	-	−1.34	-
O-Phosphorylethanolamine	-	-	−1.11	-	-	-
5-Hydroxyindole-3-acetic acid	-	-	-	-	-	1.21
Nicotinic Acid Methyl Ester（Methyl Nicotinate）	-	1.81	-	-	−1.64	−1.87
Indole-3-carboxaldehyde	−2.67	−2.96	−3.6	-	-	-
Tryptamine	-	-	−2.47	−2.51	-	−2.93
4-Hydroxyquinoline	-	-	-	−1.06	-	-
4,6-Dihydroxyquinoline	-	1.59	-	-	−1.66	−1.24
4-Hydroxymandelonitrile	-	1.01	-	-	-	-
N-Feruloyl-3-methoxytyramine	2.02	−3.28	-	-	5.3	3.26
