# Supplementary material for: Transcriptome and Metabolome Combined to Analyze Quinoa Grain Quality Differences of Different Colors Cultivars
Source: Int J Mol Sci. 2022 Oct 25;23(21):12883. doi: 10.3390/ijms232112883 (PMC9656266; doi:10.3390/ijms232112883)
Supplement: Supplementary file 1 [file ijms-23-12883-s001.zip › Table S7.xlsx]

## Sheet: Sheet1
Table S7 Analysis of differences of sugars and alcohol-related metabolites in quinoa seeds among different cultivars
Differential sugar and alcohol types	Log2FC
	BvsR	BvsW	BvsY	RvsY	WvsR	WvsY
D-Erythrose-4-phosphate	-	1.18	-	-	−1.59	−1.47
D-Glucosamine 1-phosphate	-	1.49	-	-	−1.99	−1.92
D-Galactaric acid	-	-	−1.04	-	-	-
D-Ribose	-	1.2	-	-	−1.26	−1.7
D-Glucoronic acid	-	-	−1.62	−1.27	-	-
D-Fructose 6-phosphate	-	-	−1.36	-	-	−1.09
D-Sedoheptuiose 7-phosphate	-	1.07	-	−1.07	-	−1.35
D-Threitol	-	1.81	3.26	2.44	-	1.45
Gluconic acid	-	−1.36	−1.7	−1.35	1.01	-
Inositol	-	-	-	-	-	1.13
N-Acetyl-D-glucosamine-1-phosphate	1.04	-	1.77	-	-	1.62
D（+）-Melezitose O-rhamnoside	-	1.04	-	-	-	-
Isomaltulose	-	-	1.4	1.09	-	1.84
D-Glucurono-6,3-lactone	3.35	3.23	-	−1.22	-	−1.11
N-Acetyl-D-mannosamine	-	1.35	-	-	−1.26	−2
D-Glucose	-	1.25	-	-	−1.3	−1.93
N-Acetyl-D-galactosamine	-	1.25	-	-	−1.2	−1.77
D-（-）-Arabinose	-	-	−1.11	-	-	-
Melibiose	-	-	1.27	1.03	-	1.5
D-Threonic Acid	-	1.02	-	-	-1.46	−1.87
D-（+）-Trehalose	-	-	-	1.07	-	1.35
Lactobiose	-	-	-	-	-	1.34
