# Supplementary material for: Transcriptome and Metabolome Combined to Analyze Quinoa Grain Quality Differences of Different Colors Cultivars
Source: Int J Mol Sci. 2022 Oct 25;23(21):12883. doi: 10.3390/ijms232112883 (PMC9656266; doi:10.3390/ijms232112883)
Supplement: Supplementary file 1 [file ijms-23-12883-s001.zip › Table S8.xlsx]

## Sheet: Sheet1
Table S8 Difference analysis of lignin and coumarin-related metabolites in quinoa seeds among different cultivars
Different lignin and coumarin species	Log2FC
	BvsR	BvsW	BvsY	RvsY	WvsR	WvsY
Syringaresinol-4'-O-（6''-acetyl）glucoside	-	-	−1.07	−1.49	-	-
Pinoresinol-4-O-（6''-acetyl）glucoside	-	-	−1.71	−1.71	-	−2.16
Syringaresinol	-	−1.22	-	-	1.96	-
Ayapin	-	-	−1.21	-	-	−1.32
Pinoresinol-4-O-glucoside	−1.16	-	-	-	-	-
Pinoresinol-4,4'-O-di-O-glucoside	−1.01	1.05	-	1.91	−2.05	-
Olivil-4,4'-Di-O-glucoside	-	1.45	2.04	1.93	−1.33	-
Scopoletin （7-Hydroxy-5-methoxycoumarin）	-	−2.03	1.54	1.33	2.24	3.57
Scopoletin-7-O-glucoside （Scopolin）	-	1.18	-	-	−1.14	-
Esculin （6,7-DihydroxyCoumarin-6-glucoside）	-	-	-	-	-	−1.53
Fraxetin （7,8-Dihydroxy-6-methoxycoumarin）	-	1.1	-	-	−1.5	-
Syringaresinol-4'-O-glucoside	-	1.41	-	-	−1.33	−2.04
5'-Methoxyisolariciresinol-9'-O-glucoside	-	-	1.37	-	-	-
Scopoletin-7-O-glucuronide	-	-	-	1.71	-	-
