# Supplementary material for: Transcriptome and Metabolome Combined to Analyze Quinoa Grain Quality Differences of Different Colors Cultivars
Source: Int J Mol Sci. 2022 Oct 25;23(21):12883. doi: 10.3390/ijms232112883 (PMC9656266; doi:10.3390/ijms232112883)
Supplement: Supplementary file 1 [file ijms-23-12883-s001.zip › Table S9.xlsx]

## Sheet: Sheet1
Table S9 Difference analysis of terpene-related metabolites in quinoa among different cultivars
Differential terpenoid species	Log2FC
	BvsR	BvsW	BvsY	RvsY	WvsR	WvsY
24,30-Dihydroxy-12（13）-enolupinol	-	2.9	5.19	4.96	−2.67	2.29
Oleanolic acid-3-O-glucoside	-	-	12.22	12.22	12.22	-
Oleanolic acid-3-O-xylosyl（1→3）glucuronide	-	-	−1.4	−2.28	-	-
Platycogenic acid C	-	1.38	-	-	−1.61	−1.86
Pomolic acid	-		4.93	3.96	-	4.47
Medicagenic acid-3-O-glucuronide-28-O-rhamnosyl（1,2）-arabinoside	-	−3.19	3.46	2.75	3.9	6.65
Medicagenic acid-3-O-glucosyl-（1,6）-glucosyl-（1,3）-glucoside	-	−1.81	-	-	2.3	1.99
3-O-（2-O-Acetyl-glucosyl）oleanolic acid	-	1.41	-	-	−1.73	−2.05
Oleanolic acid-3-O-glucosyl（1→2）glucoside	-	-	11.74	11.74	-	11.74
Hederagenin-3-O-glucosyl（1-2）glucosyl（1-4）arabinoside	-	-	9.6	8.93	-	9.17
Camaldulenic acid	−8.47	−8.47	2.95	11.42	-	11.42
