# Supplementary material for: Transcriptome and Metabolome Combined to Analyze Quinoa Grain Quality Differences of Different Colors Cultivars
Source: Int J Mol Sci. 2022 Oct 25;23(21):12883. doi: 10.3390/ijms232112883 (PMC9656266; doi:10.3390/ijms232112883)
Supplement: Supplementary file 1 [file ijms-23-12883-s001.zip › Table S10.xlsx]

## Sheet: Sheet1
Table S10 Difference analysis of vitamin-related metabolites in quinoa seeds among different cultivars
Different vitamin Types	Log2FC
	BvsR	BvsW	BvsY	RvsY	WvsR	WvsY
Pyridoxal	-	-	1.31	1.57	-	-
4-Pyridoxic acid	-	−1.69	−1.01	-	1.56	-
Biotin	−1.02	1.09	1.55	2.56	−2.1	-
Pyridoxine	-	-	−2.15	−2.68	1.02	−1.67
4-Pyridoxic acid-O-glucoside	-	-	−10.3	−10.95	1.43	−9.52
Pyridoxine-5'-O-glucoside	-	-	−1.93	−1.42	-	−1.3
Nicotinate D-ribonucleoside	-	-	1.67	1.82	-	1.02
D-Pantothenic Acid	-	-	−1.08	-	-	−1.45
Riboflavin	-	1.7	-	-	−1.57	-
Nicotinamide	-	−1.1	−1.19	-	-	-
Dehydroascorbic acid	-	-	-1.91	−1.82	-	−1.66
L-Ascorbic acid	3.53	3.15	2.22	−1.31	-	-
