# Supplementary material for: Transcriptome and Metabolome Combined to Analyze Quinoa Grain Quality Differences of Different Colors Cultivars
Source: Int J Mol Sci. 2022 Oct 25;23(21):12883. doi: 10.3390/ijms232112883 (PMC9656266; doi:10.3390/ijms232112883)
Supplement: Supplementary file 1 [file ijms-23-12883-s001.zip › Table S11.xlsx]

## Sheet: Sheet1
Table S11 Analysis of differences of metabolites of other classes in quinoa seeds among different cultivars
Differences of metabolites of other classes	Log2FC
	BvsW	BvsY	RvsY	WvsR	WvsY
3-Phospho-D-glyceric acid	-	−1.94	−1.53	-	−2.3
5,7-Dihydroxychromone	2.57	-	-	−2.12	−2.36
N,N-Dimethylformamide	−1.54	−2.01	−1.5	1.03	-
Palmitaldehyde	-	−1.44	−1.42	-	−1.64
Diethanolamine	−1.26	-	-	-	-
D（+）-Melezitose O-rhamnoside	1.04	-	-	-	-
4-Methyl-5-thiazoleethanol	-	−1.89	−1.32	-	-
Phenylethanolamine	-	-	-	-	-
Phenethylamine	-	−1.45	−1.12	-	−1.97
Androsin	-	-	-	−1.87	-
Dihydrocharcone-4'-O-glucoside	−2.33	1.04	1.47	1.9	3.37
