# Supplementary material for: Transcriptome and Metabolome Combined to Analyze Quinoa Grain Quality Differences of Different Colors Cultivars
Source: Int J Mol Sci. 2022 Oct 25;23(21):12883. doi: 10.3390/ijms232112883 (PMC9656266; doi:10.3390/ijms232112883)
Supplement: Supplementary file 1 [file ijms-23-12883-s001.zip › Table S12.xlsx]

## Sheet: Sheet1
Table S12 CCA analysis of differential genes in the phenylalanine metabolism pathway in BvsR
ID	KEGG	B1	B2	B3	R1	R2	R3	W1	W2	W3	Y1	Y2	Y3
gene-LOC110732717	K00276 primary-amine oxidase [EC:1.4.3.21] | (RefSeq) primary amine oxidase-like (A)	16.26	19.25	17.56	9.03	8.41	8.9	21.27	20.76	34.61	8.7	7.64	10.15
gene-LOC110686958	K00815 tyrosine aminotransferase [EC:2.6.1.5] | (RefSeq) probable aminotransferase TAT2 (A)	2.95	3.63	3.55	0.95	1.11	1.26	6.54	6.95	7.26	1.15	1.37	1.7
gene-LOC110700148	K00815 tyrosine aminotransferase [EC:2.6.1.5] | (RefSeq) tyrosine aminotransferase-like (A)	11.96	13.95	15.67	4.34	7.49	7.08	2.59	2.29	3.92	14.32	12.99	16.66
gene-LOC110732609	K00815 tyrosine aminotransferase [EC:2.6.1.5] | (RefSeq) probable aminotransferase TAT2 (A)	9.19	9.6	8.43	1.36	3.34	5.57	6.16	8.83	8.83	2.53	2.6	3.45
gene-LOC110725774	K01426 amidase [EC:3.5.1.4] | (RefSeq) LOW QUALITY PROTEIN: uncharacterized protein LOC105643773 (A)	0.19	0.23	0.27	0	0	0	0	0.31	0.16	0	0.21	0
gene-LOC110735567	K01426 amidase [EC:3.5.1.4] | (RefSeq) LOW QUALITY PROTEIN: uncharacterized protein LOC105643773 (A)	1.3	0.58	0.22	0	0	0	2.61	5.17	8.62	0	0	0
gene-LOC110697752	K01593 aromatic-L-amino-acid/L-tryptophan decarboxylase [EC:4.1.1.28 4.1.1.105] | (RefSeq) tyrosine/DOPA decarboxylase 1-like (A)	3.01	3.67	2.73	0.19	0.04	0.11	0.23	0.3	0.13	1.01	0.67	1.14
gene-LOC110711866	K01593 aromatic-L-amino-acid/L-tryptophan decarboxylase [EC:4.1.1.28 4.1.1.105] | (RefSeq) tyrosine/DOPA decarboxylase 1-like (A)	3.08	3.45	1.56	0.08	0.06	0	0.04	0.11	0.09	1.35	0.35	1.65
gene-LOC110728031	K01593 aromatic-L-amino-acid/L-tryptophan decarboxylase [EC:4.1.1.28 4.1.1.105] | (RefSeq) tyrosine decarboxylase 1-like (A)	1.82	1.98	2.01	0.74	1.13	1.03	2.19	3.14	3.48	0.93	0.65	1.2
