# Supplementary material for: Transcriptome and Metabolome Combined to Analyze Quinoa Grain Quality Differences of Different Colors Cultivars
Source: Int J Mol Sci. 2022 Oct 25;23(21):12883. doi: 10.3390/ijms232112883 (PMC9656266; doi:10.3390/ijms232112883)
Supplement: Supplementary file 1 [file ijms-23-12883-s001.zip › Table S14.xlsx]

## Sheet: Sheet1
Table S14 CCA analysis of differential genes in the phenylalanine metabolism pathway in BvsW
ID	KEGG	B1	B2	B3	R1	R2	R3	W1	W2	W3	Y1	Y2	Y3
gene-LOC110701960	K00457 4-hydroxyphenylpyruvate dioxygenase [EC:1.13.11.27] | (RefSeq) 4-hydroxyphenylpyruvate dioxygenase-like (A)	5.74	5.63	3.14	6.63	5.75	6.2	0.32	0.11	0.39	7.41	6.52	8.56
gene-LOC110686958	K00815 tyrosine aminotransferase [EC:2.6.1.5] | (RefSeq) probable aminotransferase TAT2 (A)	2.95	3.63	3.55	0.95	1.11	1.26	6.54	6.95	7.26	1.15	1.37	1.7
gene-LOC110700147	K00815 tyrosine aminotransferase [EC:2.6.1.5] | (RefSeq) tyrosine aminotransferase-like (A)	0.76	0.67	1.33	1.27	1.1	0.97	2.48	2.13	3.18	3.7	3.48	3.81
gene-LOC110700148	K00815 tyrosine aminotransferase [EC:2.6.1.5] | (RefSeq) tyrosine aminotransferase-like (A)	11.96	13.95	15.67	4.34	7.49	7.08	2.59	2.29	3.92	14.32	12.99	16.66
gene-LOC110696163	K01426 amidase [EC:3.5.1.4] | (RefSeq) putative amidase C869.01 (A)	0	0	0	0	0	0	0.07	0.08	0.13	0	0	0
gene-LOC110708459	K01426 amidase [EC:3.5.1.4] | (RefSeq) putative amidase C869.01 (A)	0	0	0	0.01	0	0	0.13	0.05	0.06	0	0	0
gene-LOC110708607	K01426 amidase [EC:3.5.1.4] | (RefSeq) amidase 1-like (A)	6.94	8.04	8.66	5.91	6.49	6.23	14.24	21.14	20.76	7.18	7.03	7.96
gene-LOC110735567	K01426 amidase [EC:3.5.1.4] | (RefSeq) LOW QUALITY PROTEIN: uncharacterized protein LOC105643773 (A)	1.3	0.58	0.22	0	0	0	2.61	5.17	8.62	0	0	0
gene-LOC110735801	K01426 amidase [EC:3.5.1.4] | (RefSeq) LOW QUALITY PROTEIN: uncharacterized protein LOC105643773 (A)	4.85	7.89	7.24	10.51	9.16	7.55	18.36	16.45	19.44	6.87	5.23	6.87
gene-LOC110697752	K01593 aromatic-L-amino-acid/L-tryptophan decarboxylase [EC:4.1.1.28 4.1.1.105] | (RefSeq) tyrosine/DOPA decarboxylase 1-like (A)	3.01	3.67	2.73	0.19	0.04	0.11	0.23	0.3	0.13	1.01	0.67	1.14
gene-LOC110711866	K01593 aromatic-L-amino-acid/L-tryptophan decarboxylase [EC:4.1.1.28 4.1.1.105] | (RefSeq) tyrosine/DOPA decarboxylase 1-like (A)	3.08	3.45	1.56	0.08	0.06	0	0.04	0.11	0.09	1.35	0.35	1.65
gene-LOC110684583	K07253 phenylpyruvate tautomerase [EC:5.3.2.1] | (RefSeq) macrophage migration inhibitory factor homolog (A)	0	0.2	0.18	0	0	0	0.73	0.61	0.44	0.02	0	0
gene-LOC110686178	K10775 phenylalanine ammonia-lyase [EC:4.3.1.24] | (RefSeq) phenylalanine ammonia-lyase class 1-like (A)	0.11	0	0	0	0	0	1.19	0.75	1.04	1.16	0.27	0.89
gene-LOC110697690	K10775 phenylalanine ammonia-lyase [EC:4.3.1.24] | (RefSeq) phenylalanine ammonia-lyase-like (A)	36.85	38.1	31.59	20.24	19.26	22.54	15.46	14.57	15.09	27.95	22.96	35.04
gene-LOC110724960	K10775 phenylalanine ammonia-lyase [EC:4.3.1.24] | (RefSeq) phenylalanine ammonia-lyase-like (A)	68.69	69.89	62.82	38.23	38.16	51.38	29.89	30.68	33.06	33.75	27.11	46.68
gene-LOC110691006	K14454 aspartate aminotransferase, cytoplasmic [EC:2.6.1.1] | (RefSeq) aspartate aminotransferase, cytoplasmic (A)	45.6	47.47	52.77	27.7	30.29	33.26	80.21	108.97	120.81	30.14	37	38.37
gene-LOC110705616	K14454 aspartate aminotransferase, cytoplasmic [EC:2.6.1.1] | (RefSeq) aspartate aminotransferase, cytoplasmic-like (A)	70.17	62.61	67.89	50.01	57.45	58.51	30.75	36.42	29.42	33.27	31.2	36
