# Supplementary material for: Transcriptome and Metabolome Combined to Analyze Quinoa Grain Quality Differences of Different Colors Cultivars
Source: Int J Mol Sci. 2022 Oct 25;23(21):12883. doi: 10.3390/ijms232112883 (PMC9656266; doi:10.3390/ijms232112883)
Supplement: Supplementary file 1 [file ijms-23-12883-s001.zip › Table S15.xlsx]

## Sheet: Sheet1
Table S15 CCA analysis of differential metabolites in the phenylalanine metabolism pathway in BvsW
Index	Formula	Compounds	B1	B2	B3	R1	R2	R3	W1	W2	W3	Y1	Y2	Y3
Lmgn001670	C7H6O3	Salicylic acid-2-O-glucoside	424770	1834700	2500000	489640	336450	324860	22223	24470	21428	19051	19551	19016
mws2213	C9H8O2	Cinnamic acid	77285	53152	50730	20560	17613	33399	13386	20162	18965	3460	4553.7	4354.1
mws0182	C8H8O3	p-Hydroxyphenyl acetic acid	1080100	1513400	1456000	1777000	1565500	1471900	3820300	4481800	3390500	1995600	2742800	2493300
