# Supplementary material for: Transcriptome and Metabolome Combined to Analyze Quinoa Grain Quality Differences of Different Colors Cultivars
Source: Int J Mol Sci. 2022 Oct 25;23(21):12883. doi: 10.3390/ijms232112883 (PMC9656266; doi:10.3390/ijms232112883)
Supplement: Supplementary file 1 [file ijms-23-12883-s001.zip › Table S16.xlsx]

## Sheet: Sheet1
Table S16 CCA analysis of differential genes in the phenylalanine metabolism pathway in BvsY
ID	KEGG	B1	B2	B3	R1	R2	R3	W1	W2	W3	Y1	Y2	Y3
gene-LOC110690302	K00074 3-hydroxybutyryl-CoA dehydrogenase [EC:1.1.1.157] | (RefSeq) uncharacterized protein LOC110690302 (A)	4.79	4.34	5.92	5.81	5.52	5.26	5.87	7.95	7.05	12.3	13.83	12.12
gene-LOC110712386	K00276 primary-amine oxidase [EC:1.4.3.21] | (RefSeq) hypothetical protein (A)	3.39	3.67	3.95	3.28	5.23	10.63	3.04	2.8	2.4	1.08	1.43	1.8
gene-LOC110732717	K00276 primary-amine oxidase [EC:1.4.3.21] | (RefSeq) primary amine oxidase-like (A)	16.26	19.25	17.56	9.03	8.41	8.9	21.27	20.76	34.61	8.7	7.64	10.15
gene-LOC110686958	K00815 tyrosine aminotransferase [EC:2.6.1.5] | (RefSeq) probable aminotransferase TAT2 (A)	2.95	3.63	3.55	0.95	1.11	1.26	6.54	6.95	7.26	1.15	1.37	1.7
gene-LOC110700147	K00815 tyrosine aminotransferase [EC:2.6.1.5] | (RefSeq) tyrosine aminotransferase-like (A)	0.76	0.67	1.33	1.27	1.1	0.97	2.48	2.13	3.18	3.7	3.48	3.81
gene-LOC110708557	K00815 tyrosine aminotransferase [EC:2.6.1.5] | (RefSeq) probable aminotransferase TAT2 (A)	2.32	1.69	1.76	4.42	4.36	3.05	1.96	2.4	2.1	5.09	3.82	4.16
gene-LOC110732609	K00815 tyrosine aminotransferase [EC:2.6.1.5] | (RefSeq) probable aminotransferase TAT2 (A)	9.19	9.6	8.43	1.36	3.34	5.57	6.16	8.83	8.83	2.53	2.6	3.45
gene-LOC110685697	K01426 amidase [EC:3.5.1.4] | (RefSeq) putative amidase C869.01 (A)	0.18	0.12	0	0	0.03	0.03	0.03	0	0.03	0	0	0
gene-LOC110718568	K01426 amidase [EC:3.5.1.4] | (RefSeq) putative amidase C869.01 (A)	0.53	0.66	0.78	0.14	0.57	0.73	0.44	0.43	0.34	0.07	0.11	0.17
gene-LOC110724067	K01426 amidase [EC:3.5.1.4] | (RefSeq) putative amidase C869.01 (A)	0	0	0	0	0	0	0	0	0.02	0.21	0.17	0.32
gene-LOC110735567	K01426 amidase [EC:3.5.1.4] | (RefSeq) LOW QUALITY PROTEIN: uncharacterized protein LOC105643773 (A)	1.3	0.58	0.22	0	0	0	2.61	5.17	8.62	0	0	0
gene-LOC110737067	K01426 amidase [EC:3.5.1.4] | (RefSeq) putative amidase C869.01 isoform X1 (A)	0.09	0.09	0.16	0.34	0.22	0.19	0.14	0.34	0.07	0.02	0.02	0.02
gene-LOC110739617	K01426 amidase [EC:3.5.1.4] | (RefSeq) putative amidase C869.01 (A)	0.18	0.14	0.21	0	0	0.08	0.03	0.19	0.58	0	0.03	0
gene-LOC110697752	K01593 aromatic-L-amino-acid/L-tryptophan decarboxylase [EC:4.1.1.28 4.1.1.105] | (RefSeq) tyrosine/DOPA decarboxylase 1-like (A)	3.01	3.67	2.73	0.19	0.04	0.11	0.23	0.3	0.13	1.01	0.67	1.14
gene-LOC110728031	K01593 aromatic-L-amino-acid/L-tryptophan decarboxylase [EC:4.1.1.28 4.1.1.105] | (RefSeq) tyrosine decarboxylase 1-like (A)	1.82	1.98	2.01	0.74	1.13	1.03	2.19	3.14	3.48	0.93	0.65	1.2
gene-LOC110738220	K01692 enoyl-CoA hydratase [EC:4.2.1.17] | (RefSeq) probable enoyl-CoA hydratase 1, peroxisomal (A)	17.49	14.71	16.28	16.84	16.79	15.59	18.38	21.74	20.08	33.71	37.27	36.55
gene-LOC110686178	K10775 phenylalanine ammonia-lyase [EC:4.3.1.24] | (RefSeq) phenylalanine ammonia-lyase class 1-like (A)	0.11	0	0	0	0	0	1.19	0.75	1.04	1.16	0.27	0.89
gene-LOC110705616	K14454 aspartate aminotransferase, cytoplasmic [EC:2.6.1.1] | (RefSeq) aspartate aminotransferase, cytoplasmic-like (A)	70.17	62.61	67.89	50.01	57.45	58.51	30.75	36.42	29.42	33.27	31.2	36
