# Supplementary material for: Transcriptome and Metabolome Combined to Analyze Quinoa Grain Quality Differences of Different Colors Cultivars
Source: Int J Mol Sci. 2022 Oct 25;23(21):12883. doi: 10.3390/ijms232112883 (PMC9656266; doi:10.3390/ijms232112883)
Supplement: Supplementary file 1 [file ijms-23-12883-s001.zip › Table S19.xlsx]

## Sheet: Sheet1
Table S19 CCA analysis of differential metabolites in the phenylalanine metabolism pathway in RvsY
Index	Formula	Compounds	B1	B2	B3	R1	R2	R3	W1	W2	W3	Y1	Y2	Y3
mws0491	C8H11N	Phenethylamine	1528300	1059500	1170600	803320	925480	942670	1255500	2528100	1021700	470940	316390	440650
Lmgn001670	C7H6O3	Salicylic acid-2-O-glucoside	424770	1834700	2500000	489640	336450	324860	22223	24470	21428	19051	19551	19016
mws2213	C9H8O2	Cinnamic acid	77285	53152	50730	20560	17613	33399	13386	20162	18965	3460	4553.7	4354.1
Lmbn002739	C9H8O3	3-Hydroxycinnamic Acid	251080	424430	502880	609280	614640	806110	606020	725360	590170	111110	108470	79678
Zmgn002106	C11H13NO3	N-Acetyl-L-phenylalanine	439310	480800	409980	368250	364060	271460	384670	380410	432130	2224900	726810	1115800
