# Supplementary material for: Transcriptome and Metabolome Combined to Analyze Quinoa Grain Quality Differences of Different Colors Cultivars
Source: Int J Mol Sci. 2022 Oct 25;23(21):12883. doi: 10.3390/ijms232112883 (PMC9656266; doi:10.3390/ijms232112883)
Supplement: Supplementary file 1 [file ijms-23-12883-s001.zip › Table S24.xlsx]

## Sheet: Sheet1
Table S24 Correlation between differential genes and differential metabolites in phenylpropane-like biosynthesis pathways
The name of metabolites	Gene ID	PCC
Scopoletin （7-Hydroxy-5-methoxycoumarin）	gene-LOC110701713	0.93
	gene-LOC110723324	0.92
	gene-LOC110718091	0.92
	gene-LOC110711372	0.92
	gene-LOC110718757	0.9
	gene-LOC110682336	0.9
	gene-LOC110711362	0.9
	gene-LOC110688531	−0.9
	gene-LOC110709434	−0.92
	gene-LOC110695973	−0.93
	gene-LOC110684179	−0.94
	gene-LOC110715013	−0.96
p-Coumaric acid	gene-LOC110724195	0.9
Trans-5-O-（p-Coumaroyl）shikimate	gene-LOC110724195	0.92
	gene-LOC110727875	−0.9
	gene-LOC110685879	−0.91
Caffeic aldehyde	gene-LOC110716610	0.99
	gene-LOC110707139	0.98
	gene-LOC110687369	0.95
	gene-LOC110695971	0.95
	gene-LOC110727876	0.95
	gene-LOC110707500	0.93
	gene-LOC110707569	0.92
	gene-LOC110707230	0.91
	gene-LOC110719130	0.91
	gene-LOC110730368	0.91
	gene-LOC110726876	0.9
	gene-LOC110739606	−0.9
	gene-LOC110707200	−0.9
	gene-LOC110685879	−0.91
	gene-LOC110731662	−0.92
	gene-LOC110692921	−0.94
	gene-LOC110686027	−0.94
	gene-LOC110720952	−0.96
	gene-LOC110712239	−0.99
	gene-LOC110709413	−1
Cinnamic acid	gene-LOC110685747	0.92
	gene-LOC110721278	−0.9
	gene-LOC110708079	−0.91
	gene-LOC110732640	−0.92
Syringin	gene-LOC110721053	0.94
	gene-LOC110707634	−0.9
